# Supplementary material for: Temporal trends in neonatal mortality and morbidity following spontaneous and clinician-initiated preterm birth in Washington State, USA: a population-based study
Source: PubMed Central journal article supplement — BMJ Open. 2019 Feb 1;9(1):e023004. doi: 10.1136/bmjopen-2018-023004 (PMC6361413; doi:10.1136/bmjopen-2018-023004), 2019-02-01
Supplement: bmjopen-2018-023004.draft_revisions.pdf [file bmjopen-2018-023004.draft_revisions.pdf]

# BMJ Open

BMJ Open is committed to open peer review. As part of this commitment we make the peer review history of every article we publish publicly available.

When an article is published we post the peer reviewers' comments and the authors' responses online. We also post the versions of the paper that were used during peer review. These are the versions that the peer review comments apply to.

The versions of the paper that follow are the versions that were submitted during the peer review process. They are not the versions of record or the final published versions. They should not be cited or distributed as the published version of this manuscript.

BMJ Open is an open access journal and the full, final, typeset and author-corrected version of record of the manuscript is available on our site with no access controls, subscription charges or pay-per-view fees (<http://bmjopen.bmj.com>).

If you have any questions on BMJ Open's open peer review process please email [info.bmjopen@bmj.com](mailto:info.bmjopen@bmj.com)

# BMJ Open

## Temporal trends in neonatal mortality and morbidity following spontaneous and iatrogenic preterm birth: a population-based study

|                               |                                                                                                                                                                                                                                                                                                                                                                                                                                                                                                                                                                                                                                                                                                                                                                                                                                                                                                                                                                                                                                                                                                                                                                                                                                                                                                                                            |
|-------------------------------|--------------------------------------------------------------------------------------------------------------------------------------------------------------------------------------------------------------------------------------------------------------------------------------------------------------------------------------------------------------------------------------------------------------------------------------------------------------------------------------------------------------------------------------------------------------------------------------------------------------------------------------------------------------------------------------------------------------------------------------------------------------------------------------------------------------------------------------------------------------------------------------------------------------------------------------------------------------------------------------------------------------------------------------------------------------------------------------------------------------------------------------------------------------------------------------------------------------------------------------------------------------------------------------------------------------------------------------------|
| Journal:                      | <i>BMJ Open</i>                                                                                                                                                                                                                                                                                                                                                                                                                                                                                                                                                                                                                                                                                                                                                                                                                                                                                                                                                                                                                                                                                                                                                                                                                                                                                                                            |
| Manuscript ID                 | bmjopen-2018-023004                                                                                                                                                                                                                                                                                                                                                                                                                                                                                                                                                                                                                                                                                                                                                                                                                                                                                                                                                                                                                                                                                                                                                                                                                                                                                                                        |
| Article Type:                 | Research                                                                                                                                                                                                                                                                                                                                                                                                                                                                                                                                                                                                                                                                                                                                                                                                                                                                                                                                                                                                                                                                                                                                                                                                                                                                                                                                   |
| Date Submitted by the Author: | 20-Mar-2018                                                                                                                                                                                                                                                                                                                                                                                                                                                                                                                                                                                                                                                                                                                                                                                                                                                                                                                                                                                                                                                                                                                                                                                                                                                                                                                                |
| Complete List of Authors:     | <p>Richter, Lindsay; Department of Obstetrics and Gynaecology, University of British Columbia and the Children's and Women's Hospital and Health Centre of British Columbia, Vancouver, BC, Canada, Obstetrics and Gynaecology</p> <p>Ting, Joseph; Department of Pediatrics, University of British Columbia and the Children's and Women's Hospital and Health Centre of British Columbia, Vancouver, BC, Canada, Pediatrics</p> <p>Muraca, Giulia; Department of Obstetrics and Gynaecology, University of British Columbia and the Children's and Women's Hospital and Health Centre of British Columbia, Vancouver, BC, Canada, Obstetrics and Gynaecology; University of British Columbia School of Population and Public Health</p> <p>Synnes, Anne; Department of Pediatrics, University of British Columbia and the Children's and Women's Hospital and Health Centre of British Columbia, Vancouver, BC, Canada, Pediatrics</p> <p>Lim, Kenneth; Department of Obstetrics and Gynaecology, University of British Columbia and the Children's and Women's Hospital and Health Centre of British Columbia, Vancouver, BC, Canada, Obstetrics and Gynaecology</p> <p>Lisonkova, Sarka; University of British Columbia, Canada, Obstetrics and Gynaecology; University of British Columbia School of Population and Public Health</p> |
| Keywords:                     | Preterm Birth, Neonatal Mortality, Neonatal Morbidity, Trend, United States                                                                                                                                                                                                                                                                                                                                                                                                                                                                                                                                                                                                                                                                                                                                                                                                                                                                                                                                                                                                                                                                                                                                                                                                                                                                |
|                               |                                                                                                                                                                                                                                                                                                                                                                                                                                                                                                                                                                                                                                                                                                                                                                                                                                                                                                                                                                                                                                                                                                                                                                                                                                                                                                                                            |

SCHOLARONE™  
Manuscripts

1  
2  
3 **Temporal trends in neonatal mortality and morbidity following spontaneous and iatrogenic**  
4  
5  
6 **preterm birth: a population-based study**

7  
8 Lindsay Richter BSc,<sup>1</sup> Joseph Ting MBBS MPH,<sup>2</sup> Giulia M Muraca MPH,<sup>1,3</sup> Anne Synnes  
9 MDCM MHSc,<sup>2</sup> Kenneth I Lim MD,<sup>1</sup> Sarka Lisonkova MD PhD<sup>1,3</sup>

10  
11 <sup>1</sup> Department of Obstetrics and Gynaecology, University of British Columbia and the Children's  
12 and Women's Hospital and Health Centre of British Columbia, Vancouver, BC, Canada.

13 <sup>2</sup> Department of Pediatrics, University of British Columbia and Women's Hospital and Health  
14 Centre of British Columbia, Vancouver, BC, Canada.

15 <sup>3</sup> School of Population and Public Health, University of British Columbia, Vancouver, BC,  
16 Canada.  
17  
18

19  
20 Corresponding author:

21 Dr. Sarka Lisonkova

22 Department of Obstetrics & Gynaecology

23 Women's Hospital and Health Centre of British Columbia

24 Room C403, 4480 Oak Street, Vancouver, BC, Canada, V6H 3V4

25 Email: slisonkova@cfri.ca Tel: 604-875-2345 x 4793 Fax: 604-875-2987  
26  
27  
28  
29

30 **Word count:** Abstract 300; Text 3456.

31 **Funding statement:** This work was supported by a Canadian Institutes of Health Research  
32 Team grant in severe maternal morbidity (MAH-115445).

33 **Competing interests statement:** None declared.

34 **Authors' contribution statement:** SL and LR designed the study, LR and SL performed data  
35 analysis, and LR and SL wrote the first draft of the manuscript. GM, JT, AS and KL contributed  
36 to the interpretation of the results and critically revised the first draft. LR, SL, GM, JT, AS and  
37 KL approved the final version of the manuscript.

38 **Ethics approval:** All analyses were performed on publicly accessible de-identified data. An  
39 exemption from ethics approval was granted by the Department of Social and Health Services,  
40 State of Washington.  
41

42 **Data sharing statement:** Analyses were based on administrative data collected and maintained  
43 by the Department of Health, State of Washington. The availability of the data is restricted.  
44 Permission for data access can be granted after verification of the research goals by the Department  
45 of Social and Health Services, State of Washington.

46 **Acknowledgements:** SL is supported by a Michael Smith Foundation for Health Research  
47 Scholar Award. JT is supported by the Investigator Grant Award Program from British Columbia  
48 Children's Hospital Research Institute. GMM is supported by a Vanier Canada Graduate  
49 Scholarship.  
50

51 **Abbreviations:** PPRM preterm premature rupture of membranes, AOR adjusted odds ratio, CI  
52 confidence interval.  
53

54 **Key words:** Preterm Birth, Neonatal Mortality, Neonatal Morbidity, Trend, United States  
55  
56  
57

## ABSTRACT

**Objective:** After a decade of increase, the preterm birth (PTB) rate has declined with the largest decline at late preterm (34-36 weeks). We aimed to describe concomitant changes in gestational age-specific rates of neonatal mortality and morbidity following iatrogenic and spontaneous PTB.

**Design, Setting, and Participants:** This retrospective population-based study included 754,763 singleton births in Washington State, U.S.A., 2004-2013, using data from birth certificates and hospitalization records. PTB subtypes included iatrogenic delivery (labor induction and cesarean delivery without labor), preterm premature rupture of membranes (PPROM), and spontaneous onset of labor.

**Outcome Measures:** The composite outcome was defined as death or any severe neonatal morbidity (bronchopulmonary dysplasia, intraventricular hemorrhage, etc.; identified by ICD-9-CM codes). The Cochran-Armitage test was used to assess temporal trends in the outcome at gestational ages (GA) 24-27, 28-31, 32-33, and 34-36 weeks. Logistic regression yielded adjusted odds ratios per 1-year change in outcome (AOR) and 95% confidence intervals (CI).

**Results:** The rate of PTB following PPRM and spontaneous labor declined, while iatrogenic PTB increased (all  $p < 0.01$ ). Overall neonatal mortality remained unchanged (1.3%), though GA-specific iatrogenic PTB mortality varied, with a decline at 32-33 weeks (AOR 0.85, CI 0.74-0.97), and increase at 34-36 weeks (AOR 1.10, CI 1.01-1.20). The overall rate of the composite outcome increased (7.9% to 11.9%). Among late preterm infants, combined mortality or severe morbidity increased following PPRM (AOR 1.13, CI 1.08-1.18), spontaneous labor (AOR 1.09, CI 1.06-1.13), and iatrogenic delivery (AOR 1.10, CI 1.07-1.13). Neonatal sepsis rates increased among all preterm infants (AOR 1.09, CI 1.08-1.11).

**Conclusions:** The temporal decline in late PTB is a favorable trend with respect to prevention of PTB. However, these changes were associated with increased mortality among iatrogenic late preterm infants and increased combined mortality or severe morbidity among all late preterm infants, mainly due to increased sepsis rates.

## STRENGTHS AND LIMITATIONS OF THIS STUDY

- Large population-based database with detailed demographic and clinical information which allowed adjustment for temporal changes in many known risk factors for preterm birth
- Major clinical preterm birth subtypes were identified and subsequent neonatal outcomes were described by gestational age categories to provide clinically-relevant information
- Data on pregnancy and birth outcomes were collected and coded consistently over the study period
- Clinical details on severity of some neonatal morbidities including necrotizing enterocolitis and retinopathy of prematurity were not available
- Coding for neonatal sepsis did not differentiate between sepsis confirmed by blood or cerebrospinal fluid culture and a clinical diagnosis of sepsis without microbiological confirmation, or between early-onset and late-onset sepsis

## INTRODUCTION

Preterm birth, defined as birth before 37 weeks' gestation, is the leading cause of neonatal mortality and morbidity, and a major risk factor for long-term neurological and respiratory morbidity and neurodevelopmental impairment.<sup>1-3</sup> In the United States, the rate of preterm birth increased by 24% between 1990 and 2006, from 10.6 to 13.1 per 100 live births,<sup>4</sup> mainly due to an increase in obstetric intervention at late preterm (34-36 weeks' gestation).<sup>5,6</sup> More recently, preterm birth rates declined to 9.8 per 100 live births in the United States in 2016.<sup>7,8</sup> Nevertheless, the high rate of preterm birth remains a considerable concern.

Preterm birth can result from many possible etiologies.<sup>9</sup> The three major clinical subtypes of preterm birth include: iatrogenic (medically-indicated) preterm birth, preterm birth following preterm premature rupture of membranes (PPROM), and preterm birth following spontaneous labor with intact membranes.<sup>1,9</sup> Iatrogenic preterm birth, including labor induction and cesarean delivery without labor, constitutes about 30-40% of all preterm births, and preeclampsia/eclampsia and severe intrauterine growth restriction are the common indications.<sup>9-11</sup> Spontaneous preterm birth can result from multiple causes, including infection or inflammation, incompetent cervix, vascular/placental disorders (other than preeclampsia), and uterine over-distension.<sup>9</sup>

While gestational age at birth is the strongest predictor of adverse neonatal outcomes,<sup>2</sup> the subtype of preterm birth is also important. Preterm infants born to women with spontaneous onset of labor have a better prognosis than infants born following PPRM or iatrogenic intervention.<sup>5,12-16</sup> However, it is unknown whether the temporal decline in preterm birth is associated with changes in neonatal mortality and morbidity among preterm infants, including those born spontaneously and iatrogenically.

1  
2  
3 Our aim was to describe temporal trends in gestational age-specific rates of neonatal  
4 mortality and a composite adverse outcome, defined as neonatal death or any severe morbidity,  
5 among preterm infants born following PPRM, spontaneous onset of labor and iatrogenic  
6 delivery. We further examined gestational age-specific rates in the specific neonatal morbidity  
7 components included in the composite outcome.  
8  
9  
10  
11  
12  
13  
14  
15  
16

## 17 **METHODS**

### 18 **Study Population**

19 We carried out a population-based study including all singleton hospital births to mothers aged  
20 15 to 60 years in Washington State, U.S.A, between January 1, 2004, and December 31, 2013.  
21 We used information from two linked population databases: (1) live birth, fetal and infant death  
22 certificates with data on maternal demographic characteristics, obstetric history, and pregnancy  
23 and birth factors, from the Birth Events Record Database (BERD); and (2) hospitalization files  
24 with information on specific infant morbidities from the Comprehensive Hospital Abstract  
25 Reporting System (CHARS). The BERD included information abstracted by trained abstractors  
26 using standardized forms about maternal characteristics (e.g., maternal age, pre-pregnancy body  
27 mass index [BMI], race, education, marital status, smoking status, chronic hypertension, pre-  
28 pregnancy diabetes, and the type of health care insurance provider); obstetric history (e.g., parity,  
29 assisted conception); and pregnancy, labor, and birth characteristics (e.g., gestational age at  
30 delivery, use of tocolytics, use of steroids at delivery, mode of delivery, prolonged labor,  
31 congenital anomalies, neonatal death and birth outcomes). The CHARS database included  
32 information on all newborn hospitalizations in Washington State with diagnosis and procedure  
33 codes related to each hospitalization episode coded by the International Classification of  
34  
35  
36  
37  
38  
39  
40  
41  
42  
43  
44  
45  
46  
47  
48  
49  
50  
51  
52  
53  
54  
55  
56  
57  
58  
59  
60

1  
2  
3 Diseases, 9<sup>th</sup> Revision, Clinical Modification (ICD-9-CM). The completeness and accuracy of  
4 these databases was monitored by the Washington State Department of Health with annual  
5 assessments and consistency checks.<sup>17-19</sup> Previous validation studies of the linked dataset showed  
6 that the positive and negative predictive values for delivery characteristics were above 80% and  
7 98%, respectively.<sup>20,21</sup> Gestational age at delivery was based on ultrasound dating, and last  
8 menstrual period dating was used for women with missing ultrasound data. We excluded infants  
9 born at less than 24 weeks' and greater than 45 weeks' gestation, and those with missing data on  
10 gestational age. We further excluded stillborn infants and those with missing mode of delivery  
11 for analyses of neonatal outcomes following preterm birth.  
12  
13  
14  
15  
16  
17  
18  
19  
20  
21  
22  
23  
24  
25

### 26 **Classification of Preterm Birth**

27  
28 Preterm birth was defined as live birth at 24 to 36 weeks' gestation. Preterm birth subtypes were  
29 categorized as follows: (1) spontaneous preterm births following PPROM (>12 hours); (2)  
30 medically-indicated iatrogenic preterm births following labor induction or cesarean delivery  
31 without labor; and (3) all others as spontaneous preterm births following spontaneous labor onset  
32 with intact membranes.  
33  
34  
35  
36  
37  
38  
39  
40  
41  
42

### 43 **Outcome Measures and Covariates**

44 The primary outcomes were neonatal mortality and a composite adverse outcome including death  
45 and any severe neonatal morbidity. Neonatal mortality was defined as death of an infant that  
46 occurred within the first 28 days after birth, including deaths in the delivery room, in-hospital  
47 deaths, and deaths after hospital discharge. Severe neonatal morbidity was identified using ICD-  
48 9-CM codes and included (a) bronchopulmonary dysplasia (BPD); (b) intraventricular  
49  
50  
51  
52  
53  
54  
55  
56  
57  
58  
59  
60



1  
2  
3 hemorrhage grade  $\geq 3$  (IVH); (c) periventricular leukomalacia (PVL); (d) retinopathy of  
4  
5 prematurity (ROP); (e) necrotizing enterocolitis (NEC), (f) neonatal sepsis; (g) convulsions of  
6  
7 newborn; and (h) severe birth trauma (Appendix Table 1).  
8  
9

10 Temporal changes in maternal characteristics over the study period were examined,  
11  
12 including maternal age (<20, 20-29, 30-39, 40+ years); pre-pregnancy BMI (underweight <18.5  
13  
14 kg/m<sup>2</sup>, normal BMI 18.5-24.9 kg/m<sup>2</sup>, overweight 25-29.9 kg/m<sup>2</sup>, and obese  $\geq 30$  kg/m<sup>2</sup>); race  
15  
16 (non-Hispanic White, African American, Native American, Hispanic, and other); maternal  
17  
18 education ( $\leq 8$  years vs.  $> 8$  years); smoking during pregnancy (yes/no); marital status  
19  
20 (married/common law vs. other); parity (prior live births, yes/no); chronic hypertension (yes/no);  
21  
22 pre-pregnancy diabetes (yes/no); assisted conception (yes/no); use of steroids (yes/no); use of  
23  
24 tocolytics (yes/no); and type of health insurance coverage (Medicaid, self-pay, private, other).  
25  
26  
27

28 We also examined temporal trends in infant characteristics including gestational ages in  
29  
30 completed weeks (within gestational age categories), small-for-gestational age infant (SGA,  
31  
32  $< 10^{\text{th}}$  percentile; yes/no), infant's sex (male/female), congenital anomalies, and stillbirths.  
33  
34

35 Congenital anomalies were identified from BERD and included the following conditions  
36  
37 observed within first 24 hours after birth: anencephaly, meningomyelocele or spina bifida,  
38  
39 cyanotic congenital heart disease, congenital diaphragmatic hernia, omphalocele, gastroschisis,  
40  
41 limb reduction, cleft lip, cleft palate, Down syndrome, chromosomal disorders, and hypospadias.  
42  
43  
44 Stillbirth was defined as spontaneous intrauterine death of a fetus. Gestational age-specific rates  
45  
46 of stillbirths were calculated using the fetuses-at-risk (FAR) approach.<sup>22</sup> Under this approach,  
47  
48 ongoing pregnancies (fetuses in-utero) at each gestation were used as denominators (the  
49  
50 appropriate at-risk population) for the calculation of gestational age-specific stillbirth rates.<sup>22,23</sup>  
51  
52  
53  
54  
55  
56  
57  
58  
59  
60

## Statistical Analyses

The preterm birth rate was calculated as a proportion of live births at 24 to 36 weeks' gestation among infants born alive at  $\geq 24$  weeks. Gestational age-specific temporal trends were described as proportions of extremely preterm births (24-27 weeks), very preterm (28-31 weeks), moderately preterm (32-33 weeks), and late preterm births (34-36 weeks). The Cochran-Armitage test was used to assess the statistical significance of temporal trends over the years. The rates of neonatal mortality and the composite outcome of neonatal death or severe morbidity were also contrasted between years 2004-2006 vs. 2011-13, using rate differences (RD) and 95% confidence intervals (CI).

Logistic regression was used to assess temporal trends in adverse neonatal outcomes adjusted for temporal changes in maternal age, pre-pregnancy BMI, race, education, smoking, marital status, parity, chronic hypertension, pre-pregnancy diabetes, assisted conception, health insurance provider, gestational age, SGA infant, sex, and congenital anomalies. Calendar year was modelled as a continuous variable. Temporal trends in adverse outcomes were expressed as the average annual change in the odds of neonatal mortality and combined neonatal death or severe neonatal morbidity with adjusted odds ratios (AOR) and 95% CI.

## Additional analyses

Temporal trends in the individual components of the composite outcome were examined as secondary outcomes using logistic regression models as described above. These analyses were performed including all preterm live born infants, and also for subgroups of infants born at late preterm, at 28-33 weeks, and at 24-27 weeks' gestation.

1  
2  
3 All analyses were carried out using SAS 9.4 (SAS Institute Inc., Cary, NC, U.S.A.). Missing  
4 values for BMI (approximately 10%) were imputed using multiple imputation (PROC MI). Other  
5 missing values were <3% of the total, and these records were not included in the multivariable  
6 analyses. All analyses were performed on publicly accessible de-identified data. An exemption  
7 from ethics approval was granted by the Department of Social and Health Services, State of  
8 Washington.

## 19 RESULTS

### 21 Study Population

23 Overall, 871 649 singleton births occurred in Washington State from 2004 to 2013. We excluded  
24 births at <24 or >45 weeks' gestation, multiple births, births that occurred outside of Washington  
25 State and out-of-hospital births, as well as births that could not be matched with hospital records  
26 (N=116 886, 13.4%). The study population included 754 763 singleton infants born in hospital at  
27  $\geq 24$  weeks; of these, 2 549 infants were stillborn (0.34%). Further, births with missing  
28 information on mode of delivery (N=14 503, 1.9%) were excluded for analyses of preterm birth  
29 rates by type of delivery (live births included 737 711 infants; Appendix Figure 1).

30  
31  
32  
33  
34  
35  
36  
37  
38  
39  
40 The rate of stillbirth increased slightly from 3.2 per 1000 fetuses-at-risk (FAR) in 2004-  
41 2006 to 3.7 per 1000 FAR in 2011-2013 ( $p=0.002$ ). Stillbirth rates increased at 24-27 weeks  
42 (from 0.7 to 1.0 per 1000 FAR,  $p=0.003$ ), and at 28-31 weeks' gestation (from 0.4 to 0.7 per  
43 1000 FAR,  $p=0.002$ ; Table 1).

44  
45  
46  
47  
48  
49 Maternal characteristics changed over the study period; women who delivered in 2011-  
50 2013 were older, more educated, and had higher pre-pregnancy BMI than those who gave birth  
51 in 2004-2006 (Table 1). The proportions of births to mothers of Hispanic and African American  
52  
53  
54  
55  
56  
57

origin, unmarried mothers, and nulliparous mothers increased, while the proportions of mothers who smoked during pregnancy decreased over time. More mothers had chronic hypertension or pre-pregnancy diabetes, and more pregnancies occurred from assisted conception in 2011-2013 than in 2004-2006. The use of antenatal steroids for lung maturation at delivery increased over the study period, while the use of tocolytics declined. All temporal changes were statistically significant ( $p < 0.001$ , Table 1).

**Table 1.** Changes in maternal and infant characteristics among live born or stillborn singleton infants ( $\geq 24$  weeks' gestation), Washington State, U.S.A., 2004-2013.

| Characteristics                  | N (%) by period |                |                | p-value* |
|----------------------------------|-----------------|----------------|----------------|----------|
|                                  | 2004-2006       | 2007-2010      | 2011-2013      |          |
| Total births                     | 219 233         | 310 101        | 225 429        |          |
| Maternal age                     |                 |                |                |          |
| <20 years                        | 18 454 (8.4)    | 24 985 (8.1)   | 13 603 (6.0)   | <0.001   |
| 20-29                            | 114 244 (52.1)  | 161 041 (51.9) | 112 427 (49.9) | <0.001   |
| 30-39                            | 80 300 (36.6)   | 115 004 (37.1) | 92 175 (40.9)  | <0.001   |
| $\geq 40$                        | 6 235 (2.8)     | 9 071 (2.9)    | 7 224 (3.2)    | <0.001   |
| Maternal BMI ( $\text{kg/m}^2$ ) |                 |                |                |          |
| Underweight (<18.5)              | 6 467 (3.0)     | 8 619 (2.8)    | 6 477 (2.9)    | <0.001   |
| Normal (18.5-24.9)               | 91 968 (42.0)   | 135 270 (43.6) | 97 451 (43.2)  | <0.001   |
| Overweight (25-29.9)             | 47 444 (21.6)   | 74 137 (23.9)  | 55 439 (24.6)  | <0.001   |
| Obese ( $\geq 30$ )              | 41 138 (18.8)   | 67 336 (21.7)  | 53 556 (23.8)  | <0.001   |
| Missing values                   | 21 216 (14.7)   | 24 739 (8.0)   | 12 506 (5.6)   | <0.001   |
| Maternal race                    |                 |                |                |          |
| Non-Hispanic White               | 143 356 (65.4)  | 195 980 (63.2) | 141 132 (62.6) | <0.001   |
| African American                 | 8 964 (4.1)     | 14 050 (4.5)   | 11 098 (4.9)   | <0.001   |
| Native American                  | 4 503 (2.1)     | 6 194 (2.0)    | 4 265 (1.9)    | <0.001   |
| Hispanic                         | 40 603 (18.5)   | 60 889 (19.6)  | 42 543 (18.9)  | 0.004    |
| Other                            | 20 558 (9.4)    | 31 814 (10.3)  | 25 266 (11.2)  | <0.001   |
| Maternal education ( $\leq 8$ )  | 9 958 (4.5)     | 11 439 (3.7)   | 6 334 (2.8)    | <0.001   |

|                                           |                 |                   |                   |                  |
|-------------------------------------------|-----------------|-------------------|-------------------|------------------|
| years)                                    |                 |                   |                   |                  |
| Smoking during pregnancy                  | 22 073 (10.1)   | 30 434 (9.8)      | 20 339 (9.0)      | <b>&lt;0.001</b> |
| Unmarried                                 | 69 033 (31.5)   | 106 787 (34.4)    | 77 143 (34.2)     | <b>&lt;0.001</b> |
| No prior live births                      | 88 552 (40.4)   | 129 513 (41.8)    | 92 232 (40.9)     | <b>&lt;0.001</b> |
| Chronic hypertension                      | 2 650 (1.2)     | 4 017 (1.3)       | 3 002 (1.3)       | <b>&lt;0.001</b> |
| Pre-pregnancy diabetes                    | 1 367 (0.6)     | 2 350 (0.8)       | 1 755 (0.8)       | <b>&lt;0.001</b> |
| Assisted conception                       | 1 551 (0.7)     | 2 849 (0.9)       | 2 487 (1.1)       | <b>&lt;0.001</b> |
| Use of tocolytics                         | 3 754 (1.7)     | 6 018 (1.9)       | 2 840 (1.3)       | <b>&lt;0.001</b> |
| Steroids use                              | 1 761 (0.8)     | 3 386 (1.1)       | 2 541 (1.1)       | <b>&lt;0.001</b> |
| 24-33 weeks delivery                      | 726/3617 (20.1) | 1 517/5331 (28.5) | 1 215/4259 (28.5) | <b>&lt;0.001</b> |
| 34-36 weeks delivery                      | 546/12808 (4.3) | 976/16895 (5.8)   | 711/12072 (5.9)   | <b>&lt;0.001</b> |
| Type of health insurance                  |                 |                   |                   |                  |
| Medicaid                                  | 83 608 (38.1)   | 122 929 (39.6)    | 91 829 (40.7)     | <b>&lt;0.001</b> |
| Self-Pay                                  | 2 100 (1.0)     | 2 708 (0.9)       | 2 561 (1.1)       | <b>&lt;0.001</b> |
| Private                                   | 109 452 (49.9)  | 162 128 (52.3)    | 115 198 (51.1)    | <b>&lt;0.001</b> |
| Other**                                   | 13 375 (6.1)    | 17 112 (5.5)      | 12 013 (5.3)      | <b>&lt;0.001</b> |
| Gestational age                           |                 |                   |                   |                  |
| 24-27 weeks                               | 678 (0.3)       | 997 (0.3)         | 820 (0.4)         | <b>0.002</b>     |
| 28-31                                     | 1 299 (0.6)     | 1 830 (0.6)       | 1 520 (0.7)       | <b>0.002</b>     |
| 32-33                                     | 1 640 (0.8)     | 2504 (0.8)        | 1 919 (0.9)       | <b>&lt;0.001</b> |
| 34-36                                     | 12 808 (5.8)    | 16 895 (5.4)      | 12 072 (5.4)      | <b>&lt;0.001</b> |
| 37+                                       | 202 808 (92.5)  | 287 875 (92.8)    | 209 098 (92.8)    | <b>&lt;0.001</b> |
| SGA infant (<10 <sup>th</sup> percentile) | 1 767 (11.5)    | 2 701 (12.8)      | 2 122 (13.6)      | <b>&lt;0.001</b> |
| Infant sex (male)                         | 112 128 (51.2)  | 158 291 (51.0)    | 116 049 (51.5)    | <b>0.026</b>     |
| Congenital anomalies***                   | 996 (0.5)       | 1 527 (0.5)       | 1 133 (0.5)       | 0.105            |
| Stillbirths [N, per 1000 FAR]             |                 |                   |                   |                  |
| 24-27 weeks                               | 149 (0.7)       | 224 (0.7)         | 219 (1.0)         | <b>0.003</b>     |
| 28-31                                     | 97 (0.4)        | 185 (0.6)         | 152 (0.7)         | <b>0.002</b>     |
| 32-33                                     | 77 (0.4)        | 97 (0.3)          | 61 (0.3)          | 0.331            |
| 34-36                                     | 137 (0.6)       | 194 (0.6)         | 160 (0.7)         | 0.381            |

|                                |              |              |              |                  |
|--------------------------------|--------------|--------------|--------------|------------------|
| ≥37                            | 23 (1.1)     | 323 (1.1)    | 243 (1.2)    | 0.659            |
| All (24-45)                    | 691 (3.2)    | 1023 (3.3)   | 835 (3.7)    | <b>0.002</b>     |
| Preterm live births by subtype |              |              |              |                  |
| [N, % by GA category]          |              |              |              |                  |
| 24-27 weeks                    | 489          | 746          | 598          | <b>0.002</b>     |
| PPROM                          | 181 (37.0)   | 198 (26.5)   | 130 (21.7)   | <b>&lt;0.001</b> |
| Spontaneous labor              | 135 (27.6)   | 208 (27.9)   | 189 (31.6)   | 0.098            |
| Iatrogenic delivery            | 173 (35.4)   | 340 (45.6)   | 279 (46.7)   | <b>&lt;0.001</b> |
| 28-31                          | 1 135        | 1 603        | 1 357        | <b>0.002</b>     |
| PPROM                          | 295 (26.0)   | 350 (21.8)   | 264 (19.5)   | <b>&lt;0.001</b> |
| Spontaneous labor              | 357 (31.5)   | 482 (30.1)   | 416 (30.7)   | 0.998            |
| Iatrogenic delivery            | 483 (42.6)   | 771 (48.1)   | 677 (49.9)   | <b>&lt;0.001</b> |
| 32-33                          | 1 469        | 2 347        | 1 848        | <b>&lt;0.001</b> |
| PPROM                          | 383 (26.1)   | 495 (21.1)   | 410 (22.2)   | <b>&lt;0.001</b> |
| Spontaneous labor              | 530 (36.1)   | 809 (34.5)   | 649 (35.1)   | 0.679            |
| Iatrogenic delivery            | 556 (37.8)   | 1 043 (44.4) | 789 (42.7)   | <b>&lt;0.001</b> |
| 34-36                          | 12 249       | 16 352       | 11 821       | <b>&lt;0.001</b> |
| PPROM                          | 1 912 (15.6) | 2 224 (13.6) | 1 673 (14.2) | <b>0.018</b>     |
| Spontaneous labor              | 5 770 (47.1) | 7 673 (46.9) | 5 530 (46.8) | 0.261            |
| Iatrogenic delivery            | 4 567 (37.3) | 6 455 (39.5) | 4 618 (39.1) | <b>0.004</b>     |
| All (24-36)                    | 15 342       | 21 048       | 15 624       | <b>&lt;0.001</b> |
| PPROM                          | 2 771 (18.1) | 3 267 (15.5) | 2 477 (15.9) | <b>&lt;0.001</b> |
| Spontaneous labor              | 6 792 (44.3) | 9 172 (43.6) | 6 784 (43.4) | <b>&lt;0.001</b> |
| Iatrogenic delivery            | 5 779 (37.7) | 8 609 (40.9) | 6 363 (40.7) | <b>0.009</b>     |

BMI, pre-pregnancy body mass index; FAR, fetuses-at-risk; GA, gestational age; SGA denotes small-for-gestational-age.

Bolded value indicates statistical significance at  $p < 0.05$

\* p-value for temporal trend over all study years (the Cochran-Armitage test)

\*\* Other medical insurance includes other government insurance, student insurance, Indian Health Care, and other programs.

\*\*\* Includes the following conditions observed within first 24 hours after birth: anencephaly, meningomyelocele or spina bifida, cyanotic congenital heart disease, congenital diaphragmatic hernia, omphalocele, gastroschisis, limb reduction, cleft lip, cleft palate, Down syndrome, chromosomal disorders, and hypospadias.

Note: Some percentages do not add up due to missing values; missing values <3% are not shown.

### **Preterm Birth Rates**

There were 737 711 singleton live births between 2004 and 2013; out of these, 52 014 infants were born preterm (7.1%). Among the preterm infants, 16.4% were born following PPRM, 43.7% were born following spontaneous onset of labor, and 39.9% were born following iatrogenic delivery. The overall preterm birth rate declined from 7.3% in 2004-2006 to 7.0% of singleton live births in 2011-2013. This decline was attributed to the decline in spontaneous delivery following PPRM (1.3% to 1.1%), and spontaneous onset of labor (3.2% to 3.0%). In contrast, iatrogenic preterm birth increased slightly from 2.7% to 2.9%. All temporal trends were statistically significant ( $p<0.01$ , Figure 1).

Gestational age-specific trends in the type of preterm birth varied (Figure 2). There were 1 833 live births at 24-27 weeks (0.2%); of these 27.8% were PPRM, 29.0% were spontaneous onset of labor, and 43.2% were iatrogenic delivery. At 28-31 weeks, there were 4 095 live births (0.6%); 22.3% were PPRM, 30.6% were spontaneous onset of labor, and 47.2% were iatrogenic. At 32-33 weeks, there were 5 664 live births (0.8%); 22.7% were PPRM, 35.1% were spontaneous onset of labor, and 42.2% were iatrogenic. At 34-36 weeks, there were 40,422 live births (5.5%); 14.4% were PPRM, 46.9% were spontaneous onset of labor, and 38.7% were iatrogenic. The overall preterm birth rate increased in all gestational age categories except for late preterm births where the rate declined from 5.8% to 5.3% (all  $p<0.01$ ). In each gestational age category, the iatrogenic preterm birth rate increased, and the PPRM preterm birth rate declined over time (all  $p<0.05$ ).

## Neonatal Mortality

Neonatal mortality remained unchanged over time (1.3%, Table 2). Neonatal mortality increased among late preterm infants between 2004-06 and 2011-13 (RD 1.9 per 1000 infants, 95% CI 0.2-3.6 per 1000; average change per year AOR was 1.064, 95% CI 1.003-1.129). Overall, higher neonatal mortality was among infants delivered following PPRM (1.7%) and iatrogenic delivery (1.6%) as compared with spontaneous delivery (0.8%).

A significant decline in mortality was observed among infants born following iatrogenic delivery at 32-33 weeks, from 2.5% in 2004-2006 to 1.0% in 2011-2013 (AOR 0.85, 95% CI 0.74-0.97; Table 3). In contrast, neonatal mortality increased from 0.5% to 0.8% (AOR 1.10, 95% CI 1.01-1.20) among infants following iatrogenic delivery at 34-36 weeks.

**Table 2.** Gestational age-specific rates of adverse neonatal outcomes among singleton preterm infants, Washington State, U.S.A., 2004-2013.

| Outcome and gestational age category        | Rates per 100 live births |            |                           | Adjusted odds ratio per 1-year change† (95% CI) |
|---------------------------------------------|---------------------------|------------|---------------------------|-------------------------------------------------|
|                                             | N (Rate)                  |            | Rate difference (95% CI)  |                                                 |
|                                             | 2004-2006                 | 2011-2013  |                           |                                                 |
| <b>Neonatal death</b>                       |                           |            |                           |                                                 |
| 24-27 weeks                                 | 76 (15.5)                 | 85 (14.2)  | -1.33 (-5.59, 2.93)       | 0.97 (0.92-1.03)                                |
| 28-31                                       | 55 (4.9)                  | 40 (3.0)   | -1.90 (-3.44, -0.36)      | 0.95 (0.89-1.01)                                |
| 32-33                                       | 23 (1.6)                  | 18 (1.0)   | -0.59 (-1.37, 0.19)       | 0.93 (0.84-1.02)                                |
| 34-36                                       | 43 (0.4)                  | 64 (0.5)   | <b>+0.19 (0.02, 0.36)</b> | <b>1.06 (1.00-1.13)</b>                         |
| All (24-36)                                 | 197 (1.3)                 | 207 (1.3)  | +0.04 (-0.21, 0.29)       | 0.99 (0.95-1.02)                                |
| <b>Neonatal death/<br/>severe morbidity</b> |                           |            |                           |                                                 |
| 24-27 weeks                                 | 353 (72.2)                | 429 (71.7) | -0.45 (-5.82, 4.92)       | 1.00 (0.96-1.04)                                |
| 28-31                                       | 383 (33.7)                | 496 (36.6) | +2.81 (-0.95, 6.57)       | <b>1.03 (1.00-1.06)</b>                         |
| 32-33                                       | 166 (11.3)                | 302 (16.3) | <b>+5.04 (2.70, 7.38)</b> | <b>1.05 (1.02-1.08)</b>                         |
| 34-36                                       | 307 (2.5)                 | 639 (5.4)  | <b>+2.90 (2.41, 3.39)</b> | <b>1.10 (1.08-1.12)</b>                         |



|             |             |              |                           |                         |
|-------------|-------------|--------------|---------------------------|-------------------------|
| All (24-36) | 1 209 (7.9) | 1 866 (11.9) | <b>+4.06 (3.40, 4.73)</b> | <b>1.06 (1.05-1.08)</b> |
|-------------|-------------|--------------|---------------------------|-------------------------|

CI, confidence interval; severe morbidity includes BPD, IVH grade $\geq$ 3, PVL, ROP, NEC, neonatal sepsis, convulsions of newborn, and severe birth trauma.

Adjusted odds ratios express the average annual change in the odds of the outcome

Bolded value indicates statistical significance at  $p < 0.05$

†Calendar year was modelled as a continuous variable; adjusted for temporal changes in maternal age, BMI, race, education, smoking, marital status, parity, chronic hypertension, pre-pregnancy diabetes, assisted conception, health insurance provider, gestational age, SGA infant, sex, and congenital anomalies.

**Table 3.** Gestational age-specific rates of neonatal death by subtype of preterm birth, Washington State, U.S.A., 2004-2013.

| Gestational age category and preterm birth subtype | Neonatal death<br>[N (per 100 live births)] |           |           | Adjusted odds ratio per 1-year change†<br>(95% CI) |
|----------------------------------------------------|---------------------------------------------|-----------|-----------|----------------------------------------------------|
|                                                    | 2004-2006                                   | 2007-2010 | 2011-2013 |                                                    |
| 24-27 weeks                                        |                                             |           |           |                                                    |
| PPROM                                              | 27 (14.9)                                   | 30 (15.2) | 18 (13.9) | 1.05 (0.94-1.17)                                   |
| Spontaneous labor                                  | 21 (15.6)                                   | 34 (16.4) | 26 (13.8) | 0.95 (0.86-1.06)                                   |
| Iatrogenic delivery                                | 28 (16.2)                                   | 47 (13.8) | 41 (14.7) | 0.94 (0.86-1.03)                                   |
| 28-31 weeks                                        |                                             |           |           |                                                    |
| PPROM                                              | 14 (4.8)                                    | 13 (3.7)  | 5 (1.9)   | 0.92 (0.78-1.07)                                   |
| Spontaneous labor                                  | 11 (3.1)                                    | 15 (3.1)  | 9 (2.2)   | 0.91 (0.77-1.06)                                   |
| Iatrogenic delivery                                | 30 (6.2)                                    | 22 (2.9)  | 26 (3.8)  | 0.96 (0.88-1.06)                                   |
| 32-33 weeks                                        |                                             |           |           |                                                    |
| PPROM                                              | 2 (0.5)                                     | 2 (0.4)   | 5 (1.2)   | 1.08 (0.80-1.45)                                   |
| Spontaneous labor                                  | 7 (1.3)                                     | 12 (1.5)  | 5 (0.8)   | 0.97 (0.83-1.13)                                   |
| Iatrogenic delivery                                | 14 (2.5)                                    | 16 (1.5)  | 8 (1.0)   | <b>0.85 (0.74-0.97)</b>                            |
| 34-36 weeks                                        |                                             |           |           |                                                    |
| PPROM                                              | 14 (0.7)                                    | 11 (0.5)  | 7 (0.4)   | 0.97 (0.84-1.12)                                   |
| Spontaneous labor                                  | 7 (0.1)                                     | 23 (0.3)  | 22 (0.4)  | 1.08 (0.96-1.20)                                   |
| Iatrogenic delivery                                | 22 (0.5)                                    | 33 (0.5)  | 35 (0.8)  | <b>1.10 (1.01-1.20)</b>                            |
| All (24-36 weeks)                                  |                                             |           |           |                                                    |
| PPROM                                              | 57 (2.1)                                    | 56 (1.7)  | 35 (1.4)  | 1.00 (0.93-1.07)                                   |
| Spontaneous labor                                  | 46 (0.7)                                    | 84 (0.9)  | 62 (0.9)  | 0.98 (0.92-1.04)                                   |

|                     |          |           |           |                  |
|---------------------|----------|-----------|-----------|------------------|
| Iatrogenic delivery | 94 (1.6) | 118 (1.4) | 110 (1.7) | 0.98 (0.94-1.03) |
|---------------------|----------|-----------|-----------|------------------|

PPROM, preterm premature rupture of membranes; CI, confidence interval

Adjusted odds ratios express the average annual change in the odds of neonatal death

Bolded value indicates statistical significance at  $p < 0.05$

†Calendar year was modelled as a continuous variable; adjusted for temporal changes in maternal age, BMI, race, education, smoking, marital status, parity, chronic hypertension, pre-pregnancy diabetes, assisted conception, health insurance provider, gestational age, SGA infant, sex, and congenital anomalies

### **Composite outcome: Neonatal Mortality or Severe Morbidity**

The rate of combined mortality or severe morbidity increased from 7.9% in 2004-2006 to 11.9% in 2011-2013 (AOR 1.06, 95% CI 1.05-1.08; Table 2). This increase was predominately due to an increase in combined mortality or severe morbidity among infants born at 32-33 weeks and 34-36 weeks' gestation (RD 5.04, 95% CI 2.70-7.38, and RD 2.90, 95% CI 2.41-3.39, respectively, both  $p < 0.001$ ); the relative average increase in combined neonatal mortality or severe morbidity was 5% per year among infants born at 32-33 weeks (AOR 1.05, 95% CI 1.02-1.08), and 10% per year among infants born at 34-36 weeks (AOR 1.10, 95% CI 1.08-1.12).

The rate of composite neonatal mortality or severe morbidity increased in each preterm birth subtype (all  $p < 0.001$ , Table 4). The rate was highest among infants born following PPROM (14.8%), and these infants had the largest relative increase (10% per year) in combined mortality or severe morbidity over the study period (AOR 1.10, 95% CI 1.07-1.13). Gestational age-specific analyses of trends in combined neonatal mortality or severe morbidity showed an increase in rates among infants born at 34-36 weeks (in all types of preterm birth), and increases in rates among infants born following PPROM at 32-33 weeks (AOR 1.12, 95% CI 1.06-1.19) and at 28-31 weeks (AOR 1.07, 95% CI 1.02-1.13). In addition, a significant increase in combined neonatal mortality or severe morbidity was observed among infants born following spontaneous onset of labor at 24-27 weeks' gestation. In contrast, iatrogenic delivery at 24-27

weeks was associated with a decline in the rate of composite adverse outcome (AOR 0.93, 95% CI 0.87-0.99).

**Table 4.** Gestational age-specific rates of neonatal death/severe morbidity by subtype of preterm birth, Washington State, U.S.A., 2004-2013.

| Gestational age category and preterm birth subtype | Neonatal death/severe morbidity<br>[N (per 100 live births)] |             |            | Adjusted odds ratio per 1-year change†<br>(95% CI) |
|----------------------------------------------------|--------------------------------------------------------------|-------------|------------|----------------------------------------------------|
|                                                    | 2004-2006                                                    | 2007-2010   | 2011-2013  |                                                    |
| 24-27 weeks                                        |                                                              |             |            |                                                    |
| PPROM                                              | 133 (73.5)                                                   | 149 (75.4)  | 98 (75.4)  | 1.01 (0.94-1.10)                                   |
| Spontaneous labor                                  | 89 (65.9)                                                    | 149 (71.6)  | 142 (75.1) | <b>1.09 (1.01-1.17)</b>                            |
| Iatrogenic delivery                                | 131 (75.7)                                                   | 242 (71.2)  | 189 (67.7) | <b>0.93 (0.87-0.99)</b>                            |
| 28-31 weeks                                        |                                                              |             |            |                                                    |
| PPROM                                              | 101 (34.2)                                                   | 120 (34.3)  | 112 (42.4) | <b>1.07 (1.02-1.13)</b>                            |
| Spontaneous labor                                  | 112 (31.4)                                                   | 147 (30.5)  | 144 (34.6) | 1.02 (0.98-1.08)                                   |
| Iatrogenic delivery                                | 170 (35.2)                                                   | 259 (33.6)  | 240 (35.5) | 1.02 (0.98-1.06)                                   |
| 32-33 weeks                                        |                                                              |             |            |                                                    |
| PPROM                                              | 42 (11.0)                                                    | 79 (16.0)   | 90 (22.0)  | <b>1.12 (1.06-1.19)</b>                            |
| Spontaneous labor                                  | 60 (11.3)                                                    | 138 (17.1)  | 87 (13.4)  | 1.01 (0.96-1.07)                                   |
| Iatrogenic delivery                                | 64 (11.5)                                                    | 161 (15.4)  | 125 (15.8) | 1.04 (0.99-1.08)                                   |
| 34-36 weeks                                        |                                                              |             |            |                                                    |
| PPROM                                              | 67 (3.5)                                                     | 140 (6.3)   | 129 (7.7)  | <b>1.13 (1.08-1.18)</b>                            |
| Spontaneous labor                                  | 111 (1.9)                                                    | 300 (3.9)   | 245 (4.4)  | <b>1.09 (1.06-1.13)</b>                            |
| Iatrogenic delivery                                | 129 (2.8)                                                    | 350 (5.4)   | 265 (5.7)  | <b>1.10 (1.07-1.13)</b>                            |
| All (24-36 weeks)                                  |                                                              |             |            |                                                    |
| PPROM                                              | 343 (12.4)                                                   | 488 (14.9)  | 429 (17.3) | <b>1.10 (1.07-1.13)</b>                            |
| Spontaneous labor                                  | 372 (5.5)                                                    | 734 (8.0)   | 618 (9.1)  | <b>1.06 (1.04-1.09)</b>                            |
| Iatrogenic delivery                                | 494 (8.6)                                                    | 1012 (11.8) | 819 (12.9) | <b>1.05 (1.03-1.07)</b>                            |

PPROM, preterm premature rupture of membranes; CI, confidence interval, severe morbidity includes BPD, IVH grade $\geq$ 3, PVL, ROP, NEC, neonatal sepsis, convulsions of newborn, and severe birth trauma.

Adjusted odds ratios express the average annual change in the odds of neonatal death and/or morbidity

1  
2  
3 Bolded value indicates statistical significance at  $p < 0.05$

4 †Calendar year was modelled as a continuous variable; adjusted for temporal changes in  
5 maternal age, BMI, race, education, smoking, marital status, parity, chronic hypertension, pre-  
6 pregnancy diabetes, assisted conception, health insurance provider, gestational age, SGA infant,  
7 sex, and congenital anomalies  
8  
9

## 10 11 12 **Additional analyses**

13  
14 The most prominent temporal trend in the rates of specific severe neonatal morbidities was an  
15 increase in the rate of neonatal sepsis, from 4.5% in 2004-06 to 8.5% in 2011-2013 (AOR 1.09,  
16 95% CI 1.08-1.11). The rate of sepsis increased substantially among late preterm infants from  
17 1.7% to 4.5% (AOR 1.12, 95% CI 1.10-1.14), infants born at 28-33 weeks (AOR 1.07, 95% CI  
18 1.05-1.10), and those born at 24-27 weeks (AOR 1.05, 95% CI 1.01-1.09). In contrast, the rate of  
19 BPD among preterm infants decreased from 2.0% to 1.7% (AOR 0.95, 95% CI 0.93-0.98;  
20 Appendix Table 2), mainly in infants born at 28-33 weeks (AOR 0.93, 95% CI 0.89-0.97).  
21  
22  
23  
24  
25  
26  
27  
28  
29  
30  
31

## 32 **DISCUSSION**

33  
34 Our findings show a decline in the preterm birth rate in Washington State between 2004 and  
35 2013 that was predominately due to a decline in spontaneous preterm birth (PPROM and  
36 spontaneous preterm labor), while iatrogenic preterm deliveries increased slightly. These  
37 changes were associated with increased mortality among late preterm infants born following  
38 iatrogenic delivery and increased rates of the composite outcome of neonatal mortality or severe  
39 morbidity among all late preterm infants. The rise in neonatal morbidity was driven mainly by  
40 the increase in the rate of neonatal sepsis.  
41  
42  
43  
44  
45  
46  
47  
48  
49

50  
51 After a large increase in the preterm birth rate in the United States in the early 2000s, a  
52 decline was observed from 12.8% in 2006 to 9.8% in 2016.<sup>4-8</sup> A recent study by Gyamfi-  
53 Bannerman *et al.* showed a decline in both iatrogenic and spontaneous preterm birth rates  
54  
55  
56  
57

1  
2  
3 between 2005 and 2012.<sup>10</sup> Our study provides more detailed information on preterm birth  
4 categories and describes temporal trends in neonatal outcomes adjusted for changes in important  
5 risk factors.  
6  
7  
8  
9

10         Obstetric interventions, changes in practice patterns, and implementation of specific  
11 evidence-based guidelines for high-risk women may be reasons behind the decline in preterm  
12 birth following spontaneous onset of labor. The use of 17  $\alpha$ -hydroxyprogesterone caproate (17P)  
13 and cerclage for women with previous spontaneous preterm births, and the use of vaginal  
14 progesterone for select women with short cervical length and without prior preterm birth  
15 progressively increased between 2006 and 2013 and may have led to a decline in spontaneous  
16 preterm births.<sup>6,24-28</sup> More aggressive pursuit of expectant management in PPRM, preeclampsia  
17 and intrauterine growth restriction may have led to a delivery at later gestation in high-risk  
18 mothers.<sup>29-31</sup> Other changes including declines in births to teenage mothers and multiple births  
19 may have contributed to an overall decline in the preterm birth rate, while increases in maternal  
20 age, obesity, and assisted conception have likely contributed to an increase in iatrogenic delivery  
21 in general.<sup>32-35</sup>  
22  
23  
24  
25  
26  
27  
28  
29  
30  
31  
32  
33  
34  
35  
36  
37

38         In 1999 and 2009, the American College of Obstetrics and Gynecologists (ACOG)  
39 advocated against elective deliveries under 39 weeks of gestation in an effort to prevent non-  
40 medically-indicated preterm births and the potentially avoidable morbidity associated with these  
41 deliveries.<sup>36,37</sup> Previous studies have shown that timely medically-indicated iatrogenic delivery  
42 can prevent stillbirth and reduce neonatal mortality.<sup>23,38,39</sup> A population-based study of all births  
43 in the United States showed that the 68% increase in iatrogenic preterm births between 1995 and  
44 2005 was not associated with increased rates of neonatal mortality/morbidity.<sup>5</sup> In our study, the  
45 small increase in iatrogenic interventions was associated with reduced mortality at 32-33 weeks  
46  
47  
48  
49  
50  
51  
52  
53  
54  
55  
56  
57  
58  
59  
60

1  
2  
3 and reduced mortality/severe morbidity at 24-27 weeks. However, at late preterm, declines in  
4 spontaneous and PPRM birth and increases in iatrogenic delivery were associated with  
5 increased mortality/severe morbidity.  
6  
7  
8  
9

10 The increase in neonatal sepsis was observed in all subtypes of late preterm birth, which  
11 points to possible common causes relatively independent of delivery type. The unfavorable  
12 trends in adverse neonatal outcomes in our study warrant further investigation, as past trends in  
13 the rate of clinical sepsis (defined broadly as ‘other infection specific to neonatal period’) in the  
14 first 3 months after birth showed a small decline between 1988 and 2006 among preterm infants  
15 in the U.S.A.<sup>40</sup> The reasons behind the increased rates of sepsis in our study may include  
16 temporal changes in the proportion of vulnerable infants, increased use of antenatal steroids, or  
17 changes in antibiotic use and antibiotic resistance.<sup>40,41</sup> Currently, there is lack of clinical  
18 diagnostic criteria or ideal laboratory marker for neonatal sepsis with excellent sensitivity for  
19 daily clinical operations, rendering the assessment of variation in the incidence rates of neonatal  
20 sepsis difficult.<sup>41-43</sup> Antibiotics are essential in the treatment of bacterial sepsis, and are the most  
21 commonly used medications in neonatal intensive units; however, overly liberal antimicrobial  
22 use has been associated with increased adverse neonatal outcomes.<sup>44</sup> A large population study in  
23 California showed substantial variations in antibiotic use that was not related to proven infection,  
24 NEC, surgical case volume, or Neonatal Intensive Care Unit (NICU) mortality, especially among  
25 community and intermediate NICUs.<sup>44</sup>  
26  
27  
28  
29  
30  
31  
32  
33  
34  
35  
36  
37  
38  
39  
40  
41  
42  
43  
44  
45  
46

47 The strengths of our study include a large population-based database with detailed  
48 information on demographic and clinical risk factors (e.g., BMI, assisted conception) and  
49 obstetric history (e.g., parity, prior adverse outcomes). We were, therefore, able to adjust for  
50 temporal changes in a large spectrum of known risk factors for preterm birth. Data on pregnancy  
51  
52  
53  
54  
55  
56  
57  
58  
59  
60

1  
2  
3 and birth outcomes were collected consistently over the study period, and neonatal morbidity  
4  
5 was also coded consistently using exclusively ICD-9-CM during the entire study period. The  
6  
7 ICD-9-CM code for neonatal sepsis did not change over the study period, and there was no  
8  
9 indication of any major changes in clinical diagnostic criteria.  
10  
11

12 This study has a few limitations. First, clinical details on severity of some neonatal  
13  
14 morbidity were not available, for example, the NEC Stage I or ROP Grade I, both of which can  
15  
16 be treated conservatively. This led to the inclusion of infants with less severe NEC and ROP or  
17  
18 other components of the composite outcome. Second, the ICD-9-CM code for neonatal sepsis did  
19  
20 not differentiate between sepsis confirmed by blood or cerebrospinal fluid culture and a clinical  
21  
22 diagnosis of sepsis without microbiological confirmation, or between early-onset and late-onset  
23  
24 sepsis. This could lead to over-diagnosis of neonatal infection. Third, information on iatrogenic  
25  
26 termination of pregnancy was not available, thus we could not account for these temporal  
27  
28 changes. However, the vast majority of iatrogenic pregnancy terminations would be included as  
29  
30 stillbirths in this study. Fourth, potential errors and omissions are inevitable in large databases;  
31  
32 these may have led to non-differential misclassification, which may have resulted in the  
33  
34 underestimation of temporal trends. Fifth, the data sources had detailed information on mode of  
35  
36 delivery that allowed accurate categorization of preterm birth subtypes; however, this  
37  
38 categorization may have overestimated the proportion of deliveries following PPROM.<sup>45</sup> Lastly,  
39  
40 a relatively large number of temporal trends were assessed, possibly rendering some trends  
41  
42 statistically significant due to chance.  
43  
44  
45  
46  
47  
48  
49  
50  
51  
52  
53  
54  
55  
56  
57  
58  
59  
60

## CONCLUSION

Our objectives were to assess temporal trends in gestational age-specific rates of neonatal mortality and a composite outcome of neonatal mortality/severe morbidity among preterm infants. The small decline in the preterm birth rate in Washington State from 2004 to 2013 was predominantly due to a decline in the rates of spontaneous onset of labor and PPRM at late preterm. This was associated with increased neonatal mortality among late preterm infants born iatrogenically, and increased composite outcome including neonatal death or severe morbidity among all late preterm infants. The increase in adverse neonatal outcomes among late preterm infants and increase in sepsis rates among all preterm infants warrant further investigation. Our findings serve as hypothesis generating for further research and are important for identifying areas for improvement in obstetric and neonatal health care.



## REFERENCES

1. Goldenberg RL, Culhane JF, Iams JD, et al. Epidemiology and cause of preterm birth. *Lancet* 2008;371:75-84.
2. Saigal S, Doyle LW. An overview of mortality and sequelae of preterm birth from infancy to adulthood. *Lancet* 2008;371:261-269.
3. Kramer MS, Demissie K, Yang H, et al. The contribution of mild and moderate preterm birth to infant mortality. Fetal and infant health study group of the Canadian perinatal surveillance system. *JAMA* 2000;284:843-849.
4. Martin JA, Osterman MJ, Sutton PD. Are preterm births on the decline in the United States? Recent data from the National Vital Statistics System. *NCHS Data Brief* 2010;39:1-8.
5. Lisonkova S, Hutcheon JA, Joseph KS. Temporal trends in neonatal outcomes following iatrogenic preterm delivery. *BMC Pregnancy and Childbirth* 2011;11:39.
6. Schoen CN, Tabbah S, Iams JD, et al. Why the United States preterm birth rate is declining. *Am J Obstet Gynecol* 2015;213(2):175-180.
7. Martin JA, Hamilton BE, Osterman MJ, et al. Births: Final data for 2015. *Natl Vital Stat Rep* 2017;66(1):1-69.
8. Hamilton BE, Martin JA, Osterman MJ, et al. Births: Provisional data for 2016. Vital statistics rapid release; report no 2. Hyattsville, MD: National Center for Health Statistics. June 2017. Available from: <https://www.cdc.gov/nchs/data/vsrr/report002.pdf> . [Accessed February 17, 2018].
9. Villar J, Papageorgiou AT, Knight HE, et al. The preterm birth syndrome: a prototype phenotypic classification. *Am J Obstet Gynecol* 2012;206(2):119-123.
10. Gyamfi-Bannerman C, Ananth CV. Trends in spontaneous and indicated preterm delivery among singleton gestations in the United States, 2005-2012. *Obstet Gynecol* 2014;124(6):1069-1074.
11. Margerison-Zilko CE, Talge NM, Holzman C. Preterm delivery trends by maternal race/ethnicity in the United States, 2006-2012. *Ann Epidemiol* 2017;27(11):689-694.
12. Ananth CV, Vintzileos AM. Maternal-fetal conditions necessitating a medical intervention resulting in preterm birth. *Am J Obstet Gynecol* 2006;195(6):1557-1563.
13. Reddy UM, Ko CW, Raju TN, et al. Delivery indications at late-preterm gestations and infant mortality rates in the United States. *Pediatrics* 2009;124(1):234-240.
14. Morken NH, Kallen K, Jacobsson B. Outcomes of preterm children according to type of delivery onset: a nationwide population-based study. *Paediatr Perinat Epidemiol* 2007;21(5):458-464.
15. Kamath-Rayne BD, DeFranco EA, Chung E, et al. Subtypes of preterm birth and the risk of postneonatal Death. *J Pediatr* 2013;162(1):28-34.
16. Chen A, Feresu SA, Barsoom MJ. Heterogeneity of preterm birth subtypes in relation to neonatal death. *Obstet Gynecol* 2009;114(3):516-522.
17. Birth Data Quality Technical Notes. Washington State Department of Health Center for Health Statistics, July 2016. Available from: <http://www.doh.wa.gov/Portals/1/Documents/5300/TechnicalNotes.pdf> . [Accessed February 17, 2018].
18. CHARS Reports. Hospital Inpatient Discharge Database Reports 2010-2016. Available from: <http://www.doh.wa.gov/ForPublicHealthandHealthcareProviders/HealthcareProfessionalsandF>

- 1  
2  
3 facilities/DataReportingandRetrieval/HospitalInpatientDatabaseCHARS . [Accessed  
4 February 17, 2018].
- 5 19. Procedure Manual For Submitting Discharge Data UB-40 and 837I 5010. Washington State  
6 Department of Health Comprehensive Abstract Reporting System January 28, 2011, Revised  
7 September 21, 2013. Available from:  
8 [http://www.doh.wa.gov/Portals/1/Documents/5300/CHARS-UB04-5010-CompanionGuide-](http://www.doh.wa.gov/Portals/1/Documents/5300/CHARS-UB04-5010-CompanionGuide-R5.pdf)  
9 [R5.pdf](http://www.doh.wa.gov/Portals/1/Documents/5300/CHARS-UB04-5010-CompanionGuide-R5.pdf) . [Accessed February 17, 2018].
  - 10 20. Lydon-Rochelle MT, Holt VL, Cardenas V, et al. The reporting of pre-existing maternal  
11 medical conditions and complications of pregnancy on birth certificates and in hospital  
12 discharge data. *Am J Obstet Gynecol* 2005;193(1):125-134.
  - 13 21. Lydon-Rochelle MT, Holt VL, Nelson JC, et al. Accuracy of reporting maternal in-hospital  
14 diagnoses and intrapartum procedures in Washington State linked birth records. *Paediatr*  
15 *Perinat Epidemiol* 2005;19(6):460-471.
  - 16 22. Joseph KS. Incidence-based measures of birth, growth restriction, and death can free  
17 perinatal epidemiology from erroneous concepts of risk. *J Clin Epidemiol* 2004;57(9):889-  
18 897.
  - 19 23. Joseph KS. Theory of obstetrics: an epidemiologic framework for justifying medically  
20 indicated early delivery. *BMC Pregnancy and Childbirth* 2007;7:4.
  - 21 24. Gyamfi-Bannerman C, Thorn EA, Blackwell SC, et al. Antenatal betamethasone for women  
22 at risk for late preterm delivery. *N Engl J Med* 2016;374(14):1311-1320.
  - 23 25. Henderson ZT, Power ML, Berghella V, et al. Attitudes and practices regarding use of  
24 progesterone to prevent preterm births. *Am J Perinatol* 2009;26(7):529-536.
  - 25 26. Fonseca EB, Celik E, Parra M, et al. Progesterone and the risk of preterm birth among  
26 women with a short cervix. *N Engl J Med* 2007;357(5):462-469.
  - 27 27. Berghella V, Rafael TJ, Szychowski JM, et al. Cerclage for short cervix on ultrasonography  
28 in women with singleton gestations and previous preterm birth: a meta-analysis. *Obstet*  
29 *Gynecol* 2011;117(3):663-671.
  - 30 28. Werner EF, Han CS, Pettker CM, et al. Universal cervical-length screening to prevent  
31 preterm birth: a cost-effectiveness analysis. *Ultrasound Obstet Gynecol* 2011;38(1):32-37.
  - 32 29. Morris JM, Roberts CL, Bowen JR, et al. Immediate delivery compared with expectant  
33 management after preterm pre-labour rupture of the membranes close to term (PPROMT  
34 trial): a randomised controlled trial. *Lancet* 2016 Jan 30;387(10017):444-452.
  - 35 30. Koopmans CM, Bijlenga D, Groen H, et al. Induction of labour versus expectant monitoring  
36 for gestational hypertension or mild pre-eclampsia after 36 weeks' gestation (HYPITAT): a  
37 multicentre, open-label randomised controlled trial. *Lancet* 2009;374(9694):979-988.
  - 38 31. Lees C, Marlow N, Arabin B, et al. Perinatal morbidity and mortality in early-onset fetal  
39 growth restriction: cohort outcomes of the trial of randomized umbilical and fetal flow in  
40 Europe (TRUFFLE). *Ultrasound Obstet Gynecol* 2013;42(4):400-408.
  - 41 32. Ogden CL, Carroll MD, Kit BK, et al. Prevalence of childhood and adult obesity in the  
42 United States, 2011-2012. *JAMA* 2014;311(8):806-814.
  - 43 33. Centers for Disease Control and Prevention. Assisted reproductive technology (ART).  
44 Available from: <http://www.cdc.gov/art> . [Accessed February 17, 2018].
  - 45 34. Lisonkova S, Muraca GM, Potts J, et al. Association between prepregnancy body mass  
46 index and severe maternal morbidity. *JAMA* 2017;318(18):1777-1786.
  - 47 35. Lisonkova S, Potts J, Muraca GM, et al. Maternal age and severe maternal morbidity:  
48 population-based retrospective cohort study. *PloS Med* 2017;14(5):e1002307.
  - 49  
50  
51  
52  
53  
54  
55  
56  
57

- 1
- 2
- 3
- 4 36. American College of Obstetricians and Gynecologists. Induction of labor. ACOG practice
- 5 bulletin no. 10. Washington, DC. *ACOG* 1999.
- 6 37. American College of Obstetricians and Gynecologists. Induction of labor. ACOG practice
- 7 bulletin no. 107. *Obstet Gynecol.* 2009;114:386-397.
- 8 38. Chang HH, Larson J, Blencowe H, et al. Preventing preterm births: analysis of trends and
- 9 potential reductions with interventions in 39 countries with very high human development
- 10 index. *Lancet* 2013;381(9862):223-234.
- 11 39. Lisonkova S, Sabr Y, Butler B, et al. International comparisons of preterm birth rates: higher
- 12 rates of late preterm birth are associated with lower rates of stillbirth and neonatal death.
- 13 *BJOG* 2012;119(13):1630-1639.
- 14 40. Lukacs SL, Schrag SJ. Clinical sepsis in neonates and young infants, United States, 1988-
- 15 2006. *J Pediatr* 2012;160(6):960-965.
- 16 41. Ting JY, Synnes A, Roberts A, et al. Association between antibiotic use and neonatal
- 17 mortality and morbidities in very low-birth-weight infants without culture-proven sepsis or
- 18 necrotizing enterocolitis. *JAMA Pediatr* 2016;170(12):1181-1187.
- 19 42. Wynn JL. Defining neonatal sepsis. *Curr Opin Pediatr* 2016;28(2):135-140.
- 20 43. Ng PC, Ma TP, Lam HS. The use of laboratory biomarkers for surveillance, diagnosis and
- 21 prediction of clinical outcomes in neonatal sepsis and necrotising enterocolitis. *Arch Dis*
- 22 *Child Fetal Neonatal Ed* 2015;100(5):F448-F452.
- 23 44. Schulman J, Dimand RJ, Lee HC, et al. Neonatal intensive care unit antibiotic use.
- 24 *Pediatrics* 2015;135(5):826-833.
- 25 45. Stout MJ, Macones GA, Tuuli MG. Accuracy of birth certificate data for classifying preterm
- 26 birth. *Paediatr Perinat Epidemiol* 2017;31(3):245-249.
- 27
- 28
- 29
- 30
- 31
- 32
- 33
- 34
- 35
- 36
- 37
- 38
- 39
- 40
- 41
- 42
- 43
- 44
- 45
- 46
- 47
- 48
- 49
- 50
- 51
- 52
- 53
- 54
- 55
- 56
- 57
- 58
- 59
- 60

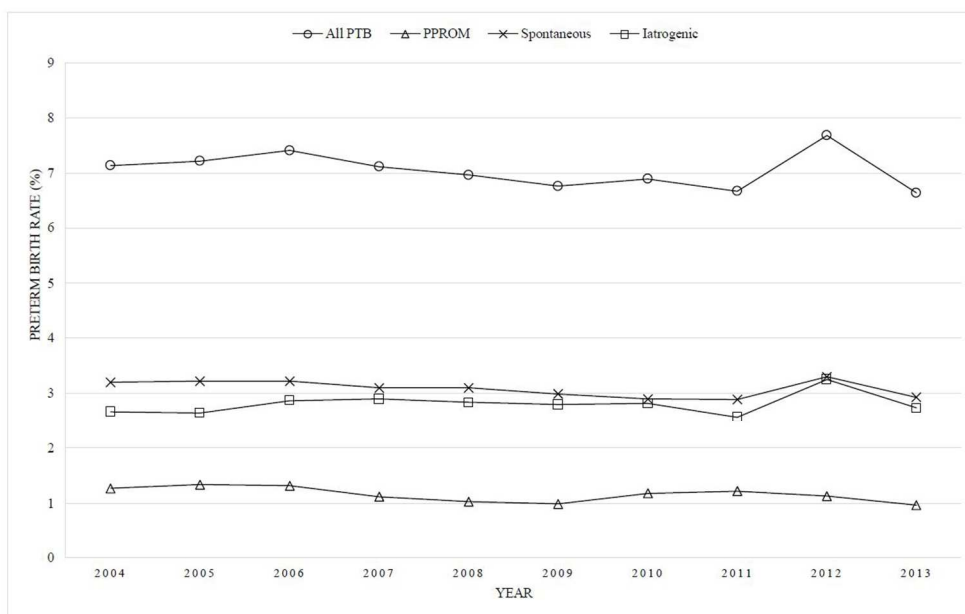

Figure 1. Temporal trends in the rates of singleton preterm birth following PPROM, spontaneous labor and iatrogenic delivery, Washington State, U.S.A., 2004-2013.

225x143mm (144 x 144 DPI)

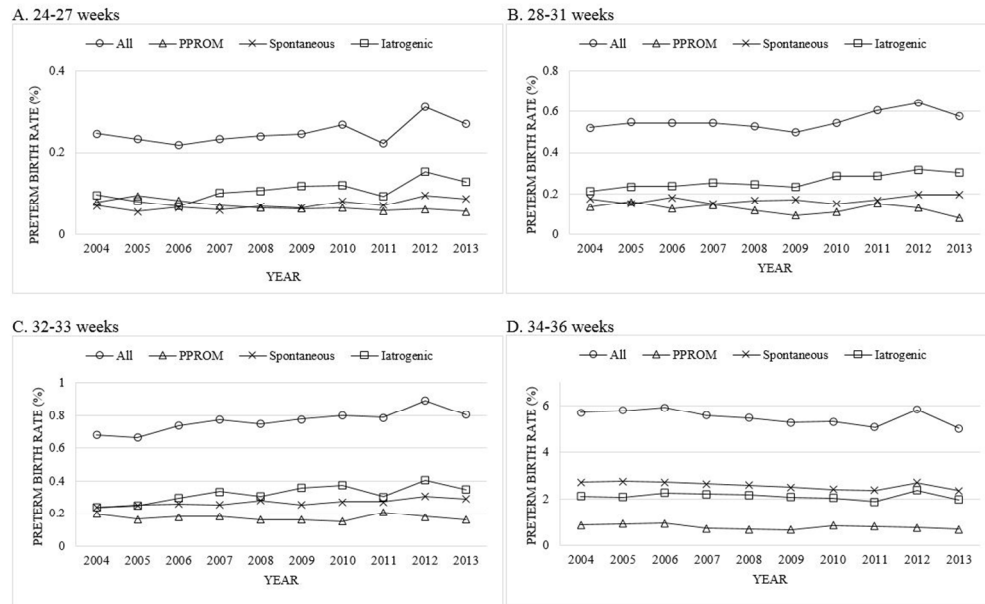

Figure 2. Temporal trends in gestational-age specific preterm birth rates following PPROM, spontaneous labor and iatrogenic delivery, Washington State, U.S.A., 2004-2013.

207x128mm (144 x 144 DPI)

**Appendix Table 1.** Severe neonatal morbidity components and ICD-9-CM codes.

| Neonatal morbidity                                                                                                                                                                                                                                                                                                                                                                                                                                                                                                                                    | ICD-9-CM code            |
|-------------------------------------------------------------------------------------------------------------------------------------------------------------------------------------------------------------------------------------------------------------------------------------------------------------------------------------------------------------------------------------------------------------------------------------------------------------------------------------------------------------------------------------------------------|--------------------------|
| <b>Bronchopulmonary dysplasia</b>                                                                                                                                                                                                                                                                                                                                                                                                                                                                                                                     | 770.7                    |
| <b>Intraventricular hemorrhage</b><br>Grade III – bleeding with enlargement of ventricle<br>Grade IV – bleeding into cerebral cortex                                                                                                                                                                                                                                                                                                                                                                                                                  | 772.13<br>772.14         |
| <b>Periventricular leukomalacia</b>                                                                                                                                                                                                                                                                                                                                                                                                                                                                                                                   | 779.7                    |
| <b>Retinopathy of prematurity</b>                                                                                                                                                                                                                                                                                                                                                                                                                                                                                                                     | 362.2                    |
| <b>Necrotizing enterocolitis</b>                                                                                                                                                                                                                                                                                                                                                                                                                                                                                                                      | 777.5                    |
| <b>Sepsis</b><br>Septicemia of newborn                                                                                                                                                                                                                                                                                                                                                                                                                                                                                                                | 771.81                   |
| <b>Convulsions</b><br>Fits in newborn; seizures in newborn                                                                                                                                                                                                                                                                                                                                                                                                                                                                                            | 779.0                    |
| <b>Severe birth trauma</b><br>Subdural and cerebral hemorrhage (whether described as due to birth trauma or to intrapartum anoxia or hypoxia; subdural hematoma (localized); tentorial tear<br>Epicranial subaponeurotic hemorrhage (massive); subgaleal hemorrhage<br>Injury to spine and spinal cord including:<br>Dislocation of spine or spinal cord due to birth trauma<br>Fracture of spine or spinal cord due to birth trauma<br>Laceration of spine or spinal cord due to birth trauma<br>Rupture of spine or spinal cord due to birth trauma | 767.0<br>767.11<br>767.4 |

**Appendix Figure 1.** Study population flow chart, Washington State, U.S.A., 2004-2013.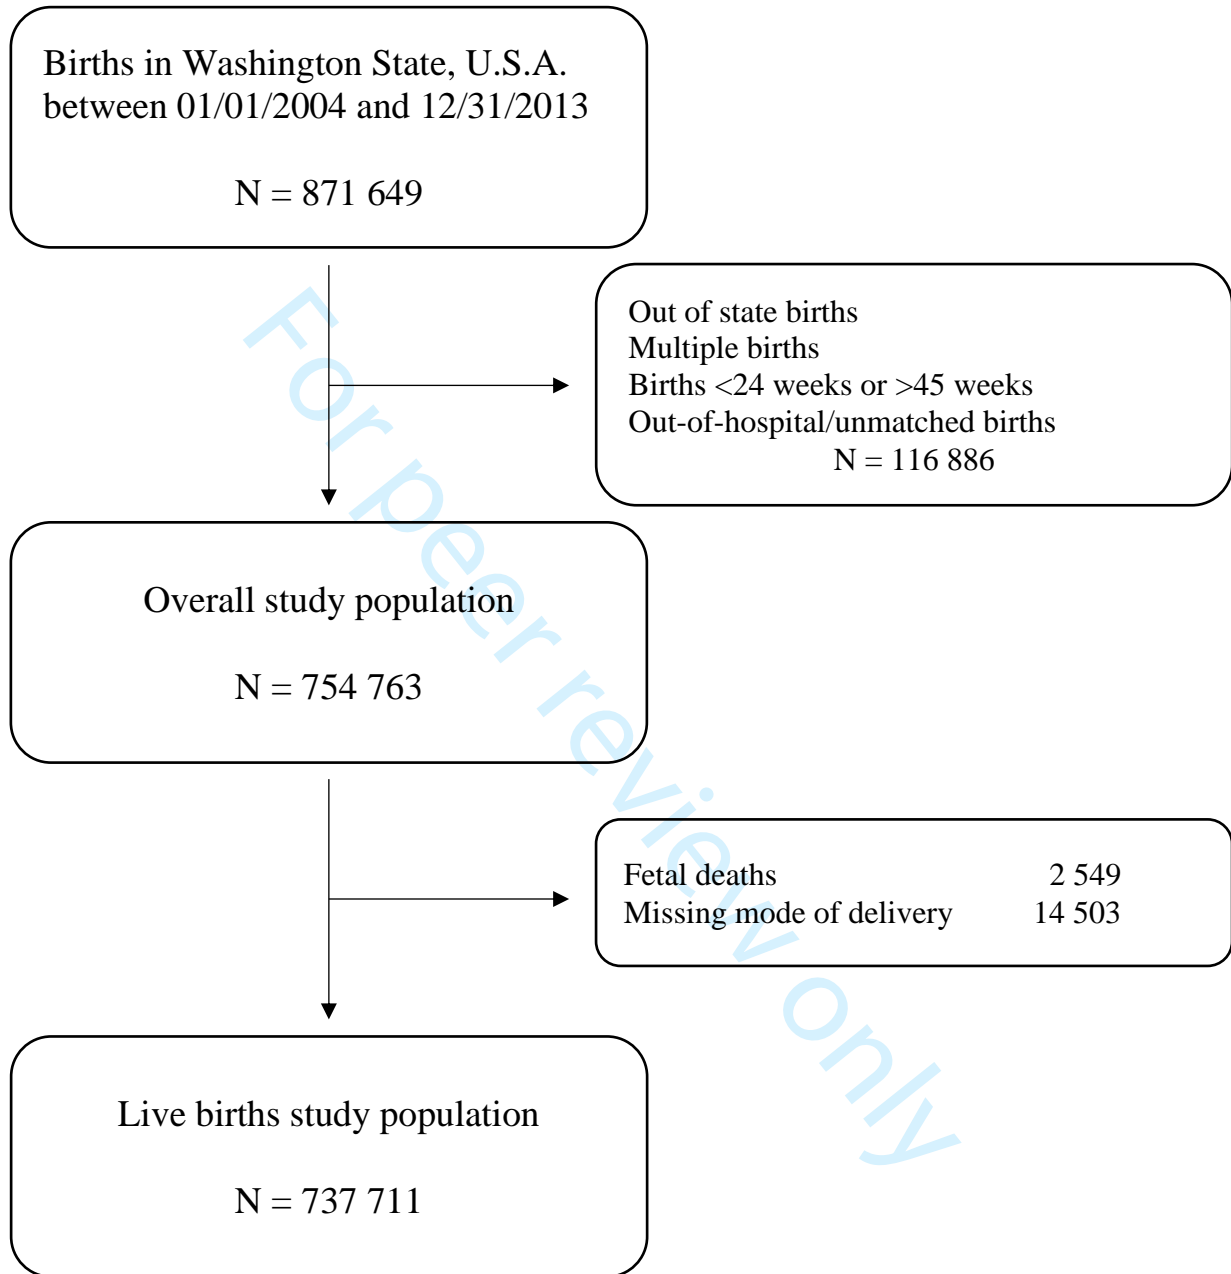

1  
2  
3 **Appendix Table 2.** Temporal trends in gestational-specific rates of severe neonatal morbidity  
4 components, Washington State, U.S.A., 2004-2013.  
5  
6  
7  
8  
9  
10  
11  
12  
13  
14  
15  
16  
17  
18  
19  
20  
21  
22  
23  
24  
25  
26  
27  
28  
29  
30  
31  
32  
33  
34  
35  
36  
37  
38  
39  
40  
41  
42  
43  
44  
45  
46  
47  
48  
49  
50  
51  
52  
53  
54  
55  
56  
57  
58  
59  
60

For peer review only



| Neonatal Morbidity            | Rates of Outcome by Period<br>[N (per 100 live births)] |             | Adjusted Odds Ratio†<br>(95% CI) |
|-------------------------------|---------------------------------------------------------|-------------|----------------------------------|
|                               | 2004-2006                                               | 2011-2013   |                                  |
| <b>All PTB (24-36 weeks)</b>  |                                                         |             |                                  |
| BPD                           | 306 (2.0)                                               | 269 (1.7)   | <b>0.95 (0.93-0.98)</b>          |
| IVH (grade $\geq 3$ )         | 72 (0.5)                                                | 61 (0.4)    | <b>0.95 (0.90-1.00)</b>          |
| PVL                           | 13 (0.1)                                                | 27 (0.2)    | 1.10 (1.00-1.22)                 |
| ROP                           | 60 (0.4)                                                | 86 (0.6)    | 1.02 (0.98-1.07)                 |
| NEC                           | 129 (0.8)                                               | 173 (1.1)   | 1.02 (0.99-1.06)                 |
| Sepsis                        | 686 (4.5)                                               | 1 331 (8.5) | <b>1.09 (1.08-1.11)</b>          |
| Convulsions                   | 53 (0.4)                                                | 62 (0.4)    | 1.00 (0.94-1.04)                 |
| Severe birth trauma           | 29 (0.2)                                                | 26 (0.2)    | 0.96 (0.89-1.04)                 |
| <b>Late PTB (34-36 weeks)</b> |                                                         |             |                                  |
| BPD                           | 6 (0.1)                                                 | 4 (0.0)     | 0.96 (0.81-1.12)                 |
| IVH (grade $\geq 3$ )         | 3 (0.0)                                                 | 3 (0.0)     | 0.97 (0.78-1.21)                 |
| PVL                           | 0 (0.0)                                                 | 0 (0.0)     | 1.05 (0.64-1.72)                 |
| ROP                           | 0 (0.0)                                                 | 2 (0.0)     | 1.56 (0.85-2.87)                 |
| NEC                           | 16 (0.1)                                                | 21 (0.2)    | 1.04 (0.95-1.14)                 |
| Sepsis                        | 211 (1.7)                                               | 530 (4.5)   | <b>1.12 (1.10-1.14)</b>          |
| Convulsions                   | 26 (0.2)                                                | 28 (0.2)    | 1.01 (0.93-1.09)                 |
| Severe birth trauma           | 16 (0.1)                                                | 14 (0.1)    | 0.97 (0.87-1.08)                 |
| <b>PTB at 28-33 weeks</b>     |                                                         |             |                                  |
| BPD                           | 121 (4.7)                                               | 95 (3.0)    | <b>0.93 (0.89-0.97)</b>          |
| IVH (grade $\geq 3$ )         | 24 (0.9)                                                | 19 (0.6)    | 0.92 (0.84-1.01)                 |
| PVL                           | 8 (0.3)                                                 | 15 (0.5)    | 1.06 (0.93-1.21)                 |
| ROP                           | 35 (1.3)                                                | 63 (2.0)    | 1.05 (0.99-1.11)                 |
| NEC                           | 76 (2.9)                                                | 89 (2.8)    | 1.00 (0.95-1.05)                 |
| Sepsis                        | 306 (11.8)                                              | 554 (17.3)  | <b>1.07 (1.05-1.10)</b>          |
| Convulsions                   | 19 (0.7)                                                | 20 (0.6)    | 0.96 (0.87-1.05)                 |
| Severe birth trauma           | 9 (0.4)                                                 | 9 (0.3)     | 0.95 (0.82-1.11)                 |
| <b>PTB at 24-27 weeks</b>     |                                                         |             |                                  |

|                       |            |            |                         |
|-----------------------|------------|------------|-------------------------|
| BPD                   | 179 (36.6) | 170 (28.4) | 0.97 (0.94-1.01)        |
| IVH (grade $\geq 3$ ) | 45 (9.2)   | 39 (6.5)   | 0.95 (0.88-1.01)        |
| PVL                   | 5 (1.0)    | 12 (2.0)   | 1.13 (0.96-1.32)        |
| ROP                   | 25 (5.1)   | 21 (3.5)   | 0.95 (0.87-1.02)        |
| NEC                   | 37 (7.6)   | 63 (10.5)  | 1.04 (0.98-1.10)        |
| Sepsis                | 169 (34.6) | 247 (41.3) | <b>1.05 (1.01-1.09)</b> |
| Convulsions           | 8 (1.6)    | 14 (2.3)   | 1.02 (0.91-1.14)        |
| Severe birth trauma   | 4 (0.8)    | 3 (0.5)    | 0.94 (0.76-1.15)        |

CI, confidence interval; PTB, preterm birth; BPD, bronchopulmonary dysplasia; IVH, intraventricular hemorrhage; PVL, periventricular leukomalacia; ROP, retinopathy of prematurity; NEC, necrotizing enterocolitis.

Adjusted odds ratios express the average annual change in the odds for each morbidity.

Bolded value indicates statistical significance at  $p < 0.05$

†Calendar year was modelled as a continuous variable; adjusted for temporal changes in maternal age, BMI, race, education, smoking, marital status, parity, chronic hypertension, pre-pregnancy diabetes, assisted conception, health insurance provider, gestational age, SGA infant, sex, and congenital anomalies. NOTE: some covariates were excluded from the regression models due to collinearity.

## STROBE Statement—checklist of items that should be included in reports of observational studies

|                              | Item No | Recommendation                                                                                                                                                                                                                                                                                                                                                                                                                                                                                                                                                                                                                                                                                                                     |
|------------------------------|---------|------------------------------------------------------------------------------------------------------------------------------------------------------------------------------------------------------------------------------------------------------------------------------------------------------------------------------------------------------------------------------------------------------------------------------------------------------------------------------------------------------------------------------------------------------------------------------------------------------------------------------------------------------------------------------------------------------------------------------------|
| <b>Title and abstract</b>    | 1       | Indicate the study's design with a commonly used term in the title or the abstract<br><b>a population-based study; title page</b><br>(b) Provide in the abstract an informative and balanced summary of what was done and what was found<br><b>This was done; abstract, page 2</b>                                                                                                                                                                                                                                                                                                                                                                                                                                                 |
| <b>Introduction</b>          |         |                                                                                                                                                                                                                                                                                                                                                                                                                                                                                                                                                                                                                                                                                                                                    |
| Background/rationale         | 2       | Explain the scientific background and rationale for the investigation being reported<br><b>This was done, page 4-5</b>                                                                                                                                                                                                                                                                                                                                                                                                                                                                                                                                                                                                             |
| Objectives                   | 3       | State specific objectives, including any prespecified hypotheses<br><b>This was done, page 5</b>                                                                                                                                                                                                                                                                                                                                                                                                                                                                                                                                                                                                                                   |
| <b>Methods</b>               |         |                                                                                                                                                                                                                                                                                                                                                                                                                                                                                                                                                                                                                                                                                                                                    |
| Study design                 | 4       | Present key elements of study design early in the paper<br><b>This was done, page 5</b>                                                                                                                                                                                                                                                                                                                                                                                                                                                                                                                                                                                                                                            |
| Setting                      | 5       | Describe the setting, locations, and relevant dates, including periods of recruitment, exposure, follow-up, and data collection<br><b>This was done, page 5</b>                                                                                                                                                                                                                                                                                                                                                                                                                                                                                                                                                                    |
| Participants                 | 6       | (a) <i>Cohort study</i> —Give the eligibility criteria, and the sources and methods of selection of participants. Describe methods of follow-up<br><i>Case-control study</i> —Give the eligibility criteria, and the sources and methods of case ascertainment and control selection. Give the rationale for the choice of cases and controls<br><i>Cross-sectional study</i> —Give the eligibility criteria, and the sources and methods of selection of participants<br><b>This was done, page 5-6</b><br>(b) <i>Cohort study</i> —For matched studies, give matching criteria and number of exposed and unexposed<br><i>Case-control study</i> —For matched studies, give matching criteria and the number of controls per case |
| Variables                    | 7       | Clearly define all outcomes, exposures, predictors, potential confounders, and effect modifiers. Give diagnostic criteria, if applicable<br><b>This was done, page 6-7</b>                                                                                                                                                                                                                                                                                                                                                                                                                                                                                                                                                         |
| Data sources/<br>measurement | 8*      | For each variable of interest, give sources of data and details of methods of assessment (measurement). Describe comparability of assessment methods if there is more than one group<br><b>This was done, page 5-6</b>                                                                                                                                                                                                                                                                                                                                                                                                                                                                                                             |
| Bias                         | 9       | Describe any efforts to address potential sources of bias<br><b>This was done, page 6-7 (inclusion/exclusion criteria, consistent use of case ascertainment by ICD-9-CM codes from administrative data to avoid recall bias or diagnostic bias)</b>                                                                                                                                                                                                                                                                                                                                                                                                                                                                                |
| Study size                   | 10      | Explain how the study size was arrived at<br><b>This was done, page 5 (population-based)</b>                                                                                                                                                                                                                                                                                                                                                                                                                                                                                                                                                                                                                                       |
| Quantitative variables       | 11      | Explain how quantitative variables were handled in the analyses. If applicable, describe which groupings were chosen and why                                                                                                                                                                                                                                                                                                                                                                                                                                                                                                                                                                                                       |

| <b>This was done, page 6-8</b> |    |                                                                                                                         |
|--------------------------------|----|-------------------------------------------------------------------------------------------------------------------------|
| Statistical methods            | 12 | (a) Describe all statistical methods, including those used to control for confounding                                   |
| <b>This was done, page 8</b>   |    |                                                                                                                         |
|                                |    | (b) Describe any methods used to examine subgroups and interactions                                                     |
| <b>This was done, page 8</b>   |    |                                                                                                                         |
|                                |    | (c) Explain how missing data were addressed <b>page 9</b>                                                               |
|                                |    | (d) <i>Cohort study</i> —If applicable, explain how loss to follow-up was addressed                                     |
|                                |    | <i>Case-control study</i> —If applicable, explain how matching of cases and controls was addressed                      |
|                                |    | <i>Cross-sectional study</i> —If applicable, describe analytical methods taking account of sampling strategy <b>n/a</b> |
|                                |    | (e) Describe any sensitivity analyses <b>not included</b>                                                               |

Continued on next page

**Results**

|                  |     |                                                                                                                                                                                                                                                                                                                                                                                                                                                                                                         |
|------------------|-----|---------------------------------------------------------------------------------------------------------------------------------------------------------------------------------------------------------------------------------------------------------------------------------------------------------------------------------------------------------------------------------------------------------------------------------------------------------------------------------------------------------|
| Participants     | 13* | (a) Report numbers of individuals at each stage of study—eg numbers potentially eligible, examined for eligibility, confirmed eligible, included in the study, completing follow-up, and analysed<br><b>This was done, page 9</b><br>(b) Give reasons for non-participation at each stage <b>This was done, page 9</b><br>(c) Consider use of a flow diagram <b>This was done, Appendix Figure 1</b>                                                                                                    |
| Descriptive data | 14* | (a) Give characteristics of study participants (eg demographic, clinical, social) and information on exposures and potential confounders <b>This was done, Table 1</b><br>(b) Indicate number of participants with missing data for each variable of interest <b>This was done, Table 1</b><br>(c) <i>Cohort study</i> —Summarise follow-up time (eg, average and total amount)                                                                                                                         |
| Outcome data     | 15* | <i>Cohort study</i> —Report numbers of outcome events or summary measures over time<br><i>Case-control study</i> —Report numbers in each exposure category, or summary measures of exposure<br><i>Cross-sectional study</i> —Report numbers of outcome events or summary measures <b>This was done, page 10-12, Table 1, Table 2, Table 3, Table 4, Figure 1, Figure 2</b>                                                                                                                              |
| Main results     | 16  | (a) Give unadjusted estimates and, if applicable, confounder-adjusted estimates and their precision (eg, 95% confidence interval). Make clear which confounders were adjusted for and why they were included <b>This was done, Table 2, Table 3, Table 4</b><br>(b) Report category boundaries when continuous variables were categorized <b>This was done</b><br>(c) If relevant, consider translating estimates of relative risk into absolute risk for a meaningful time period <b>This was done</b> |
| Other analyses   | 17  | Report other analyses done—eg analyses of subgroups and interactions, and sensitivity analyses <b>This was done, page 12, Appendix Table 2</b>                                                                                                                                                                                                                                                                                                                                                          |

**Discussion**

|                  |    |                                                                                                                                                                                                          |
|------------------|----|----------------------------------------------------------------------------------------------------------------------------------------------------------------------------------------------------------|
| Key results      | 18 | Summarise key results with reference to study objectives <b>This was done, page 13</b>                                                                                                                   |
| Limitations      | 19 | Discuss limitations of the study, taking into account sources of potential bias or imprecision. Discuss both direction and magnitude of any potential bias <b>This was done, page 15-16</b>              |
| Interpretation   | 20 | Give a cautious overall interpretation of results considering objectives, limitations, multiplicity of analyses, results from similar studies, and other relevant evidence <b>This was done, page 16</b> |
| Generalisability | 21 | Discuss the generalisability (external validity) of the study results <b>This was done, page 13-14</b>                                                                                                   |

**Other information**

|         |    |                                                                                                                                                                                            |
|---------|----|--------------------------------------------------------------------------------------------------------------------------------------------------------------------------------------------|
| Funding | 22 | Give the source of funding and the role of the funders for the present study and, if applicable, for the original study on which the present article is based <b>This was done, page 1</b> |
|---------|----|--------------------------------------------------------------------------------------------------------------------------------------------------------------------------------------------|

\*Give information separately for cases and controls in case-control studies and, if applicable, for exposed and unexposed groups in cohort and cross-sectional studies.

**Note:** An Explanation and Elaboration article discusses each checklist item and gives methodological background and published examples of transparent reporting. The STROBE checklist is best used in conjunction with this article (freely available on the Web sites of PLoS Medicine at <http://www.plosmedicine.org/>, Annals of Internal Medicine at <http://www.annals.org/>, and Epidemiology at <http://www.epidem.com/>). Information on the STROBE Initiative is available at [www.strobe-statement.org](http://www.strobe-statement.org).

# BMJ Open

## Temporal trends in neonatal mortality and morbidity following spontaneous and clinician-initiated preterm birth in Washington State, U.S.A.: a population-based study

|                                 |                                                                                                                                                                                                                                                                                                                                                                                                                                                                                                                                                                                                                                                                                                                                                                                                                                                                                                                                                                                                                                                                                                                                                                                                                                                                                                                 |
|---------------------------------|-----------------------------------------------------------------------------------------------------------------------------------------------------------------------------------------------------------------------------------------------------------------------------------------------------------------------------------------------------------------------------------------------------------------------------------------------------------------------------------------------------------------------------------------------------------------------------------------------------------------------------------------------------------------------------------------------------------------------------------------------------------------------------------------------------------------------------------------------------------------------------------------------------------------------------------------------------------------------------------------------------------------------------------------------------------------------------------------------------------------------------------------------------------------------------------------------------------------------------------------------------------------------------------------------------------------|
| Journal:                        | <i>BMJ Open</i>                                                                                                                                                                                                                                                                                                                                                                                                                                                                                                                                                                                                                                                                                                                                                                                                                                                                                                                                                                                                                                                                                                                                                                                                                                                                                                 |
| Manuscript ID                   | bmjopen-2018-023004.R1                                                                                                                                                                                                                                                                                                                                                                                                                                                                                                                                                                                                                                                                                                                                                                                                                                                                                                                                                                                                                                                                                                                                                                                                                                                                                          |
| Article Type:                   | Research                                                                                                                                                                                                                                                                                                                                                                                                                                                                                                                                                                                                                                                                                                                                                                                                                                                                                                                                                                                                                                                                                                                                                                                                                                                                                                        |
| Date Submitted by the Author:   | 12-Sep-2018                                                                                                                                                                                                                                                                                                                                                                                                                                                                                                                                                                                                                                                                                                                                                                                                                                                                                                                                                                                                                                                                                                                                                                                                                                                                                                     |
| Complete List of Authors:       | Richter, Lindsay; Department of Obstetrics and Gynaecology, University of British Columbia and the Children's and Women's Hospital and Health Centre of British Columbia, Vancouver, BC, Canada, Obstetrics and Gynaecology<br>Ting, Joseph; Department of Pediatrics, University of British Columbia and the Children's and Women's Hospital and Health Centre of British Columbia, Vancouver, BC, Canada, Pediatrics<br>Muraca, Giulia; Department of Obstetrics and Gynaecology, University of British Columbia and the Children's and Women's Hospital and Health Centre of British Columbia, Vancouver, BC, Canada, Obstetrics and Gynaecology; University of British Columbia School of Population and Public Health<br>Synnes, Anne; Department of Pediatrics, University of British Columbia and the Children's and Women's Hospital and Health Centre of British Columbia, Vancouver, BC, Canada, Pediatrics<br>Lim, Kenneth; Department of Obstetrics and Gynaecology, University of British Columbia and the Children's and Women's Hospital and Health Centre of British Columbia, Vancouver, BC, Canada, Obstetrics and Gynaecology<br>Lisonkova, Sarka; University of British Columbia, Canada, Obstetrics and Gynaecology; University of British Columbia School of Population and Public Health |
| <b>Primary Subject Heading</b>: | Epidemiology                                                                                                                                                                                                                                                                                                                                                                                                                                                                                                                                                                                                                                                                                                                                                                                                                                                                                                                                                                                                                                                                                                                                                                                                                                                                                                    |
| Secondary Subject Heading:      | Obstetrics and gynaecology, Epidemiology, Paediatrics                                                                                                                                                                                                                                                                                                                                                                                                                                                                                                                                                                                                                                                                                                                                                                                                                                                                                                                                                                                                                                                                                                                                                                                                                                                           |
| Keywords:                       | Preterm Birth, Neonatal Mortality, Neonatal Morbidity, Trend, United States                                                                                                                                                                                                                                                                                                                                                                                                                                                                                                                                                                                                                                                                                                                                                                                                                                                                                                                                                                                                                                                                                                                                                                                                                                     |
|                                 |                                                                                                                                                                                                                                                                                                                                                                                                                                                                                                                                                                                                                                                                                                                                                                                                                                                                                                                                                                                                                                                                                                                                                                                                                                                                                                                 |

SCHOLARONE™  
Manuscripts

1  
2  
3 **Temporal trends in neonatal mortality and morbidity following spontaneous and clinician-**  
4  
5 **initiated preterm birth in Washington State, U.S.A.: a population-based study**  
6  
7

8 Lindsay Richter BSc,<sup>1</sup> Joseph Ting MBBS MPH,<sup>2</sup> Giulia M Muraca MPH PhD,<sup>1,3</sup> Anne Synnes  
9 MDCM MHSc,<sup>2</sup> Kenneth I Lim MD,<sup>1</sup> Sarka Lisonkova MD PhD<sup>1,3</sup>  
10

11 <sup>1</sup> Department of Obstetrics and Gynaecology, University of British Columbia and the Children's  
12 and Women's Hospital and Health Centre of British Columbia, Vancouver, BC, Canada.

13 <sup>2</sup> Department of Pediatrics, University of British Columbia and Women's Hospital and Health  
14 Centre of British Columbia, Vancouver, BC, Canada.

15 <sup>3</sup> School of Population and Public Health, University of British Columbia, Vancouver, BC,  
16 Canada.  
17  
18

19  
20 Corresponding author:

21 Dr. Sarka Lisonkova

22 Department of Obstetrics & Gynaecology

23 Women's Hospital and Health Centre of British Columbia

24 Room C403, 4480 Oak Street, Vancouver, BC, Canada, V6H 3V4

25 Email: slisonkova@cfri.ca Tel: 604-875-2345 x 4793 Fax: 604-875-2987  
26  
27  
28  
29

30 **Word count:** Abstract 300; Text 4178.

31 **Funding statement:** This work was supported by a Canadian Institutes of Health Research  
32 Team grant in severe maternal morbidity (MAH-115445).

33 **Competing interests statement:** None declared.

34 **Authors' contribution statement:** SL and LR designed the study, LR and SL performed data  
35 analysis, and LR and SL wrote the first draft of the manuscript. GM, JT, AS and KL contributed  
36 to the interpretation of the results and critically revised the first draft. LR, SL, GM, JT, AS and  
37 KL approved the final version of the manuscript.

38 **Ethics approval:** All analyses were performed on publicly accessible de-identified data. An  
39 exemption from ethics approval was granted by the Department of Social and Health Services,  
40 State of Washington.  
41

42 **Data sharing statement:** Analyses were based on administrative data collected and maintained  
43 by the Department of Health, State of Washington. The availability of the data is restricted.  
44 Permission for data access can be granted after verification of the research goals by the Department  
45 of Social and Health Services, State of Washington.

46 **Acknowledgements:** SL is supported by a Michael Smith Foundation for Health Research  
47 Scholar Award. JT is supported by the Investigator Grant Award Program from British Columbia  
48 Children's Hospital Research Institute. GMM is supported by a Vanier Canada Graduate  
49 Scholarship.  
50

51 **Abbreviations:** PPRM preterm premature rupture of membranes, AOR adjusted odds ratio, CI  
52 confidence interval.  
53

54 **Key words:** Preterm Birth, Neonatal Mortality, Neonatal Morbidity, Trend, United States  
55  
56  
57

## ABSTRACT

**Objective:** After a decade of increase, the preterm birth (PTB) rate has declined in the United States since 2006, with the largest decline at late preterm (34-36 weeks). We described concomitant changes in gestational age-specific rates of neonatal mortality and morbidity following spontaneous and clinician-initiated PTB among singleton infants.

**Design, Setting, and Participants:** This retrospective population-based study included 754,763 singleton births in Washington State, U.S.A., 2004-2013, using data from birth certificates and hospitalization records. PTB subtypes included preterm premature rupture of membranes (PPROM), spontaneous onset of labor, and clinician-initiated delivery.

**Outcome Measures:** The primary outcomes were neonatal mortality and a composite outcome including death or severe neonatal morbidity. Temporal trends in the outcomes and individual morbidities were assessed by PTB subtype. Logistic regression yielded adjusted odds ratios (AOR) per 1-year change in outcome and 95% confidence intervals (CI).

**Results:** The rate of PTB following PPRM and spontaneous labor declined, while clinician-initiated PTB increased (all p-values<0.01). Overall neonatal mortality remained unchanged (1.3%; AOR 0.99, CI 0.95-1.02), though gestational age-specific mortality following clinician-initiated PTB declined at 32-33 weeks (AOR 0.85, CI 0.74-0.97), and increased at 34-36 weeks (AOR 1.10, CI 1.01-1.20). The overall rate of the composite outcome increased (from 7.9% to 11.9%; AOR 1.06, CI 1.05-1.08). Among late preterm infants, combined mortality or severe morbidity increased following PPRM (AOR 1.13, CI 1.08-1.18), spontaneous labor (AOR 1.09, CI 1.06-1.13), and clinician-initiated delivery (AOR 1.10, CI 1.07-1.13). Neonatal sepsis rates increased among all preterm infants (AOR 1.09, CI 1.08-1.11).

**Conclusions:** Timing of obstetric interventions is associated with infant health outcomes at preterm. The temporal decline in late PTB among singleton infants was associated with increased mortality among late preterm infants born following clinician-initiated delivery and increased combined mortality or severe morbidity among all late preterm infants, mainly due to increased rate of sepsis.



## STRENGTHS AND LIMITATIONS OF THIS STUDY

- Large population-based database with detailed demographic and clinical information which allowed adjustment for temporal changes in many known risk factors for preterm birth
- Major clinical preterm birth subtypes were identified and subsequent neonatal outcomes were described by gestational age categories to provide clinically-relevant information
- Data on pregnancy and birth outcomes were collected and coded consistently over the study period
- Clinical details on severity of some neonatal morbidities including necrotizing enterocolitis and retinopathy of prematurity were not available
- Coding for neonatal sepsis did not differentiate between sepsis confirmed by blood or cerebrospinal fluid culture and a clinical diagnosis of sepsis without microbiological confirmation, or between early-onset and late-onset sepsis

## INTRODUCTION

Preterm birth, defined as birth before 37 weeks' gestation, is the leading cause of neonatal mortality and morbidity, and a major risk factor for long-term neurological and respiratory morbidity and neurodevelopmental impairment.(1–3) In the United States, the rate of preterm birth increased by 24% between 1990 and 2006, from 10.6 to 13.1 per 100 live births, mainly due to an increase in obstetric intervention at late preterm (34–36 weeks' gestation).(4–6) More recently, preterm birth rates declined to 9.8 per 100 live births in the United States in 2015.(7,8) Nevertheless, the high rate of preterm birth remains a considerable concern.

Preterm birth can result from many possible etiologies.(9) The three major clinical subtypes of preterm birth include: clinician-initiated preterm birth, preterm birth following preterm premature rupture of membranes (PPROM), and preterm birth following spontaneous labor with intact membranes.(1,9) Clinician-initiated preterm birth, including labor induction and cesarean delivery without labor, constitutes about 30–40% of all preterm births, and pre-eclampsia/eclampsia and severe intrauterine growth restriction are the common indications.(9–11) Spontaneous preterm birth can result from multiple causes, including infection or inflammation, incompetent cervix, vascular/placental disorders (other than preeclampsia), and uterine over-distension.(9)

While gestational age at birth is the strongest predictor of adverse neonatal outcomes, the subtype of preterm birth is also important. Preterm infants born to women with spontaneous onset of labor have a better prognosis than infants born following clinician-initiated delivery.(5,12–15) However, it is unknown whether the temporal decline in preterm birth is associated with changes in neonatal mortality and morbidity among preterm infants.

1  
2  
3 Our aim was to describe temporal trends in gestational age-specific rates of neonatal  
4 mortality and a composite adverse outcome, defined as neonatal death or any severe morbidity,  
5 among preterm infants born following PPRM, spontaneous onset of labor and clinician-  
6 initiated delivery. We further examined gestational age-specific rates in the specific neonatal  
7 morbidity components included in the composite outcome.  
8  
9  
10  
11  
12  
13  
14  
15  
16

## 17 **METHODS**

### 18 **Study Population**

19 We carried out a population-based study including all singleton hospital births to mothers aged  
20 15 to 60 years in Washington State, U.S.A., between January 1, 2004, and December 31, 2013.  
21 We used information from two linked population databases: (1) live birth, fetal and infant death  
22 certificates with data on maternal demographic characteristics, obstetric history, and pregnancy  
23 and birth factors, from the Birth Events Record Database (BERD); and (2) hospitalization files  
24 with information on specific infant morbidities from the Comprehensive Hospital Abstract  
25 Reporting System (CHARS). The BERD included information abstracted by trained abstractors  
26 using standardized forms about maternal characteristics (e.g., maternal age, pre-pregnancy body  
27 mass index [BMI], race, education, marital status, smoking status, chronic hypertension, pre-  
28 pregnancy diabetes, and the type of health care insurance provider); obstetric history (e.g., parity,  
29 assisted conception); and pregnancy, labor, and birth characteristics (e.g., gestational age at  
30 delivery, use of tocolytics, use of steroids at delivery, mode of delivery, prolonged labor,  
31 congenital anomalies, neonatal death and birth outcomes). The CHARS database included  
32 information on all newborn hospitalizations in Washington State with diagnosis and procedure  
33 codes related to each hospitalization episode coded by the International Classification of  
34  
35  
36  
37  
38  
39  
40  
41  
42  
43  
44  
45  
46  
47  
48  
49  
50  
51  
52  
53  
54  
55  
56  
57  
58  
59  
60

1  
2  
3 Diseases, 9<sup>th</sup> Revision, Clinical Modification (ICD-9-CM). The completeness and accuracy of  
4 these databases was monitored by the Washington State Department of Health with annual  
5 assessments and consistency checks.(16–18) Records flagged with inconsistent or out-of-range  
6 entries were addressed systematically through hospital review and correction. The frequency of  
7 diagnostic and procedure codes was monitored in annual reports.(18) Previous validation studies  
8 of the linked dataset showed that the positive and negative predictive values (PPV and NPV) for  
9 delivery characteristics were above 80% and 98%, respectively; (19,20) for example, labor  
10 induction had PPV 89.0% and NPV 94.5%.(20) Gestational age at delivery was based on  
11 ultrasound dating, and last menstrual period dating was used for women with missing ultrasound  
12 data. We excluded infants born at less than 24 weeks' and greater than 45 weeks' gestation, and  
13 those with missing data on gestational age from the overall study population. After analysis of  
14 temporal trends in stillbirth, we excluded stillborn infants and those with missing mode of  
15 delivery to limit the analyses of neonatal outcomes following various types of preterm birth to  
16 live births only.  
17  
18  
19  
20  
21  
22  
23  
24  
25  
26  
27  
28  
29  
30  
31  
32  
33  
34  
35  
36  
37

### 38 **Classification of Preterm Birth**

39  
40 Preterm birth was defined as live birth at 24 to 36 weeks' gestation. Preterm birth subtypes were  
41 categorized using the following algorithm: (1) first, spontaneous preterm births following  
42 PPRM (>12 hours); (2) second, clinician-initiated preterm births following labor induction or  
43 cesarean delivery without labor; and (3) third, all other births were classified as spontaneous  
44 preterm births following spontaneous labor onset with intact membranes (Supplementary File 1,  
45 items no 62, 64, 65).  
46  
47  
48  
49  
50  
51  
52  
53  
54  
55  
56  
57  
58  
59  
60

## Outcome Measures and Covariates

The primary outcomes were neonatal mortality and a composite adverse outcome including death or severe neonatal morbidity. Neonatal mortality was defined as death of an infant that occurred within the first 28 days after birth, including deaths in the delivery room, in-hospital deaths, and deaths after hospital discharge. Severe neonatal morbidity was identified using ICD-9-CM codes and included (a) bronchopulmonary dysplasia (BPD); (b) intraventricular hemorrhage grade  $\geq 3$  (IVH); (c) periventricular leukomalacia (PVL); (d) retinopathy of prematurity (ROP); (e) necrotizing enterocolitis (NEC), (f) neonatal sepsis; (g) convulsions of newborn; and (h) severe birth trauma (Appendix Table 1).

Temporal changes in maternal characteristics over the study period were examined, including maternal age (<20, 20-29, 30-39, 40+ years); pre-pregnancy BMI (underweight <18.5 kg/m<sup>2</sup>, normal BMI 18.5-24.9 kg/m<sup>2</sup>, overweight 25-29.9 kg/m<sup>2</sup>, and obese  $\geq 30$  kg/m<sup>2</sup>); race (non-Hispanic White, African American, Native American, Hispanic, and other); maternal education ( $\leq 8$  years vs. >8 years); smoking during pregnancy (yes/no); marital status (married/common law vs. other); parity (prior live births, yes/no); chronic hypertension (yes/no); pre-pregnancy diabetes (yes/no); assisted conception (yes/no); use of steroids (yes/no); use of tocolytics (yes/no); and type of health insurance coverage (Medicaid, self-pay, private, other).

We also examined temporal trends in infant characteristics including gestational ages in completed weeks (within gestational age categories), small-for-gestational age infant (SGA, <10<sup>th</sup> percentile (21); yes/no), infant's sex (male/female), congenital anomalies, and stillbirths.

Congenital anomalies were identified from BERD and included the following conditions observed within first 24 hours after birth: anencephaly, meningomyelocele or spina bifida, cyanotic congenital heart disease, congenital diaphragmatic hernia, omphalocele, gastroschisis,

1  
2  
3 limb reduction, cleft lip, cleft palate, Down syndrome, chromosomal disorders, and hypospadias.  
4  
5 Stillbirth was defined as spontaneous intrauterine death of a fetus. Gestational age-specific rates  
6  
7 of stillbirths were calculated using the fetuses-at-risk (FAR) approach.(22) Under this approach,  
8  
9 ongoing pregnancies (fetuses in-utero) at each gestation were used as denominators (the  
10  
11 appropriate at-risk population) for the calculation of gestational age-specific stillbirth  
12  
13 rates.(22,23)  
14  
15

### 19 **Statistical Analyses**

20  
21 The preterm birth rate was calculated as a proportion of live births at 24 to 36 weeks' gestation  
22  
23 among infants born alive at  $\geq 24$  weeks. Gestational age-specific temporal trends were described  
24  
25 as proportions of extremely preterm births (24-27 weeks), very preterm (28-31 weeks),  
26  
27 moderately preterm (32-33 weeks), and late preterm births (34-36 weeks). The Cochran-  
28  
29 Armitage test was used to assess the statistical significance of temporal trends over the years.  
30  
31 The rates of neonatal mortality and the composite outcome of neonatal death or severe morbidity  
32  
33 were also contrasted between years 2004-2006 vs. 2011-13, using rate ratio (RR) and rate  
34  
35 difference (RD) and 95% confidence intervals (CI).  
36  
37  
38  
39

40 Logistic regression was used to assess temporal trends in adverse neonatal outcomes  
41  
42 adjusted for temporal changes in risk factors that may have changed over the study period:  
43  
44 maternal age, pre-pregnancy BMI, race, education, smoking, marital status, parity, chronic  
45  
46 hypertension, pre-pregnancy diabetes, assisted conception, health insurance provider, gestational  
47  
48 age, SGA infant, sex, and congenital anomalies. Calendar year was modelled as a continuous  
49  
50 variable. Temporal trends in adverse outcomes were expressed as the average annual change in  
51  
52  
53  
54  
55  
56  
57  
58  
59  
60

1  
2  
3 the odds of neonatal mortality and combined neonatal death or severe neonatal morbidity with  
4  
5 adjusted odds ratios (AOR) and 95% CI.  
6  
7  
8  
9

### 10 **Additional Analyses**

11  
12 Temporal trends in the individual components of the composite outcome were examined as  
13  
14 secondary outcomes using logistic regression models as described above. These analyses were  
15  
16 performed including all preterm live born infants, and also for subgroups of infants born at late  
17  
18 preterm, at 28-33 weeks, and at 24-27 weeks' gestation.  
19  
20  
21  
22  
23

24 All analyses were carried out using SAS 9.4 (SAS Institute Inc., Cary, NC, U.S.A.). Missing  
25  
26 values for BMI (approximately 10%) were imputed using multiple imputation (PROC MI). Other  
27  
28 missing values were <3.0% of the total, and the complete case multivariable analysis excluded  
29  
30 7.0% of preterm births. All p-values are reported as recommended by the American Statistical  
31  
32 Association.(24) All analyses were performed on publicly accessible de-identified data. An  
33  
34 exemption from ethics approval was granted by the Department of Social and Health Services,  
35  
36 State of Washington.  
37  
38  
39  
40  
41

### 42 **Patient and Public Involvement**

43  
44 No patients or public were directly involved in this study.  
45  
46  
47  
48  
49  
50  
51  
52  
53  
54  
55  
56  
57  
58  
59  
60

## RESULTS

### Study Population

Overall, 871 649 singleton births occurred in Washington State from 2004 to 2013. We excluded births at <24 or >45 weeks' gestation, multiple births, births that occurred outside of Washington State and out-of-hospital births, as well as births that could not be matched with hospital records (N=116 886, 13.4%). The study population included 754 763 singleton infants born in hospital at  $\geq 24$  weeks; of these, 2 549 infants were stillborn (0.34%). Further, births with missing information on mode of delivery (N=14 503, 1.9%) were excluded for analyses of preterm birth rates by type of delivery (live births included 737 711 infants; Appendix Figure 1).

The rate of stillbirth increased slightly from 3.2 per 1000 total births in 2004-2006 to 3.7 in 2011-2013 ( $p=0.002$ ). Stillbirth rates increased at 24-27 weeks (from 0.7 to 1.0 per 1000 fetuses-at-risk (FAR),  $p=0.003$ ), and at 28-31 weeks' gestation (from 0.4 to 0.7 per 1000 FAR,  $p=0.002$ ; Appendix Figure 2).

Maternal characteristics changed over the study period; women who delivered in 2011-2013 were older, more educated, and had higher pre-pregnancy BMI than those who gave birth in 2004-2006 (Table 1). The proportions of births to mothers of Hispanic and African American origin, unmarried mothers, and nulliparous mothers increased, while the proportions of mothers who smoked during pregnancy decreased over time. More mothers had chronic hypertension or pre-pregnancy diabetes, and more pregnancies occurred from assisted conception in 2011-2013 than in 2004-2006. The use of antenatal steroids for lung maturation at delivery increased over the study period, while the use of tocolytics declined. All temporal changes were statistically significant ( $p<0.001$ , Table 1).

**Table 1.** Maternal and infant characteristics among all singleton infants born at  $\geq 24$  weeks' gestation), Washington State, U.S.A., 2004-2013.



| Characteristic                            | All Years<br>(2004-2013) | Period 1<br>(2004-2006) | Period 2<br>(2011-2013) | p-value*<br>(Period 1 vs.<br>Period 2) |
|-------------------------------------------|--------------------------|-------------------------|-------------------------|----------------------------------------|
| Total singleton births                    | 754 763                  | 219 233                 | 225 429                 |                                        |
| Maternal age (years)                      |                          |                         |                         | <0.001                                 |
| <20                                       | 57 042 (7.5)             | 18 454 (8.4)            | 13 603 (6.0)            |                                        |
| 20-29                                     | 387 712 (51.4)           | 114 244 (52.1)          | 112 427 (49.9)          |                                        |
| 30-39                                     | 287 479 (38.1)           | 80 300 (36.6)           | 92 175 (40.9)           |                                        |
| ≥40                                       | 22 530 (3.0)             | 6 235 (2.8)             | 7 224 (3.2)             |                                        |
| Maternal BMI (kg/m <sup>2</sup> )         |                          |                         |                         | <0.001                                 |
| Underweight (<18.5)                       | 21 563 (2.9)             | 6 467 (3.0)             | 6 477 (2.9)             |                                        |
| Normal (18.5-24.9)                        | 324 689 (43.0)           | 91 968 (42.0)           | 97 451 (43.2)           |                                        |
| Overweight (25-29.9)                      | 177 020 (23.5)           | 47 444 (21.6)           | 55 439 (24.6)           |                                        |
| Obese (≥30)                               | 162 030 (21.5)           | 41 138 (18.8)           | 53 556 (23.8)           |                                        |
| Missing values                            | 69 461 (9.2)             | 32 216 (14.7)           | 12 506 (5.6)            |                                        |
| Maternal race                             |                          |                         |                         | <0.001                                 |
| Non-Hispanic White                        | 480 468 (63.7)           | 143 356 (65.4)          | 141 132 (62.6)          |                                        |
| African American                          | 34 112 (4.5)             | 8 964 (4.1)             | 11 098 (4.9)            |                                        |
| Native American                           | 14 962 (2.0)             | 4 503 (2.1)             | 4 265 (1.9)             |                                        |
| Hispanic                                  | 144 035 (19.1)           | 40 603 (18.5)           | 42 543 (18.9)           |                                        |
| Other                                     | 77 638 (10.3)            | 20 558 (9.4)            | 25 266 (11.2)           |                                        |
| Type of health insurance                  |                          |                         |                         | <0.001                                 |
| Medicaid                                  | 298 366 (39.5)           | 83 608 (38.1)           | 91 829 (40.7)           |                                        |
| Self-Pay                                  | 7 369 (1.0)              | 2 100 (1.0)             | 2 561 (1.1)             |                                        |
| Private                                   | 386 778 (51.2)           | 109 452 (49.9)          | 115 198 (51.1)          |                                        |
| Other**                                   | 42 500 (5.6)             | 13 375 (6.1)            | 12 013 (5.3)            |                                        |
| Maternal education (≤8 years)             | 27 731 (3.6)             | 9 958 (4.5)             | 6 334 (2.8)             | <0.001                                 |
| Smoking during pregnancy                  | 72 846 (9.7)             | 22 073 (10.1)           | 20 339 (9.0)            | <0.001                                 |
| Unmarried                                 | 252 963 (33.5)           | 69 033 (31.5)           | 77 143 (34.2)           | <0.001                                 |
| No prior live births                      | 310 297 (41.1)           | 88 552 (40.4)           | 92 232 (40.9)           | <0.001                                 |
| Chronic hypertension                      | 9 669 (1.3)              | 2 650 (1.2)             | 3 002 (1.3)             | 0.003                                  |
| Pre-pregnancy diabetes                    | 5 472 (0.7)              | 1 367 (0.6)             | 1 755 (0.8)             | <0.001                                 |
| Assisted conception                       | 6 887 (0.9)              | 1 551 (0.7)             | 2 487 (1.1)             | <0.001                                 |
| Gestational age (weeks)                   |                          |                         |                         | <0.001                                 |
| 24-27                                     | 2 495 (0.3)              | 678 (0.3)               | 820 (0.4)               |                                        |
| 28-31                                     | 4 649 (0.6)              | 1 299 (0.6)             | 1 520 (0.7)             |                                        |
| 32-33                                     | 6 063 (0.8)              | 1 640 (0.8)             | 1 919 (0.9)             |                                        |
| 34-36                                     | 41 775 (5.5)             | 12 808 (5.8)            | 12 072 (5.4)            |                                        |
| ≥37                                       | 699 781 (92.7)           | 202 808 (92.5)          | 209 098 (92.8)          |                                        |
| SGA infant (<10 <sup>th</sup> percentile) | 6 590 (0.9)              | 1 767 (0.8)             | 2 122 (0.9)             | <0.001                                 |
| Infant sex (male)                         | 386 468 (51.2)           | 112 128 (51.2)          | 116 049 (51.5)          | 0.026                                  |
| Congenital anomalies***                   | 3 656 (0.5)              | 996 (0.5)               | 1 133 (0.5)             | 0.066                                  |

BMI, pre-pregnancy body mass index; SGA, small-for-gestational-age

\* p-value for Chi-square test comparing Period 1 and 2.

\*\* Includes other government insurance, student insurance, Indian Health Care, and other programs.

\*\*\* Includes the following conditions observed within first 24 hours after birth: anencephaly, meningomyelocele or spina bifida, cyanotic congenital heart disease, congenital diaphragmatic hernia, omphalocele, gastroschisis, limb reduction, cleft lip, cleft palate, Down syndrome, chromosomal disorders, and hypospadias.

Note: Some percentages do not add up due to missing values; missing values <3% are not shown.

### Preterm Birth Rates

There were 737 711 singleton live births between 2004 and 2013; out of these, 52 014 infants were born preterm (7.1%). Among the preterm infants, 16.4% were born following PPRM, 43.7% were born following spontaneous onset of labor, and 39.9% were born following clinician-initiated delivery (Appendix Table 2). The overall preterm birth rate declined from 7.3% in 2004-2006 to 7.0% of singleton live births in 2011-2013. This decline was attributed to the decline in spontaneous delivery following PPRM (1.3% to 1.1%), and spontaneous onset of labor (3.2% to 3.0%). In contrast, clinician-initiated preterm birth increased slightly from 2.7% to 2.9% (all p-values for trend <0.01; Figure 1).

Gestational age-specific trends in the type of preterm birth varied (Figure 2). There were 1 833 live births at 24-27 weeks (0.2%); of these 27.8% were PPRM, 29.0% were spontaneous onset of labor, and 43.2% were clinician-initiated delivery. At 28-31 weeks, there were 4 095 live births (0.6%); 22.3% were PPRM, 30.6% were spontaneous onset of labor, and 47.2% were clinician-initiated. At 32-33 weeks, there were 5 664 live births (0.8%); 22.7% were PPRM, 35.1% were spontaneous onset of labor, and 42.2% were clinician-initiated. At 34-36 weeks, there were 40,422 live births (5.5%); 14.4% were PPRM, 46.9% were spontaneous onset of labor, and 38.7% were clinician-initiated. The overall preterm birth rate increased in all gestational age categories except for late preterm births where the rate declined from 5.8% to

5.3% (all  $p < 0.01$ ). In each gestational age category, the clinician-initiated preterm birth rate increased, and the PPRM preterm birth rate declined over time (all  $p < 0.05$ ).

### Neonatal Mortality

Neonatal mortality remained unchanged over time (1.3%, Table 2). Neonatal mortality increased among late preterm infants between 2004-06 and 2011-13 (RR 1.25, 95% CI 0.85-1.84; average change per year AOR 1.064, 95% CI 1.003-1.129; Table 2). Overall, higher neonatal mortality was among infants delivered following PPRM (1.7%) and clinician-initiated delivery (1.6%) as compared with spontaneous delivery (0.8%).

A significant decline in mortality was observed among infants born following clinician-initiated delivery at 32-33 weeks, from 2.5% in 2004-2006 to 1.0% in 2011-2013 (RR 0.40, 95% CI 0.17-0.95; AOR 0.85, 95% CI 0.74-0.97; Table 3). In contrast, neonatal mortality increased from 0.5% to 0.8% (RR 1.60, 95% CI 0.94-2.73; AOR 1.10, 95% CI 1.01-1.20) among infants following clinician-initiated delivery at 34-36 weeks.

**Table 2.** Gestational age-specific rates of adverse neonatal outcomes among singleton preterm infants, Washington State, U.S.A., 2004-2013.

| Outcome and gestational age category | Rates per 100 live births |            |                     | Adjusted odds ratio per 1-year change† (95% CI) |
|--------------------------------------|---------------------------|------------|---------------------|-------------------------------------------------|
|                                      | N (Rate)                  |            | Rate ratio (95% CI) |                                                 |
|                                      | 2004-2006                 | 2011-2013  |                     |                                                 |
| Neonatal death                       |                           |            |                     |                                                 |
| 24-27 weeks                          | 76 (15.5)                 | 85 (14.2)  | 0.92 (0.67-1.25)    | 0.97 (0.92-1.03)                                |
| 28-31                                | 55 (4.9)                  | 40 (3.0)   | 0.61 (0.41-0.92)    | 0.95 (0.89-1.01)                                |
| 32-33                                | 23 (1.6)                  | 18 (1.0)   | 0.63 (0.34-1.16)    | 0.93 (0.84-1.02)                                |
| 34-36                                | 43 (0.4)                  | 64 (0.5)   | 1.25 (0.85-1.84)    | 1.06 (1.00-1.13)                                |
| All (24-36)                          | 197 (1.3)                 | 207 (1.3)  | 1.00 (0.82-1.22)    | 0.99 (0.95-1.02)                                |
| Neonatal death/severe morbidity      |                           |            |                     |                                                 |
| 24-27 weeks                          | 353 (72.2)                | 429 (71.7) | 0.99 (0.86-1.14)    | 1.00 (0.96-1.04)                                |
| 28-31                                | 383 (33.7)                | 496 (36.6) | 1.08 (0.95-1.24)    | 1.03 (1.00-1.06)                                |
| 32-33                                | 166 (11.3)                | 302 (16.3) | 1.44 (1.19-1.74)    | 1.05 (1.02-1.08)                                |
| 34-36                                | 307 (2.5)                 | 639 (5.4)  | 2.16 (1.89-2.47)    | 1.10 (1.08-1.12)                                |

All (24-36) 1 209 (7.9) 1 866 (11.9) 1.51 (1.40-1.62) 1.06 (1.05-1.08)

CI, confidence interval; severe morbidity includes BPD, IVH grade $\geq$ 3, PVL, ROP, NEC, neonatal sepsis, convulsions of newborn, and severe birth trauma.

Adjusted odds ratios express the average annual change in the odds of the outcome.

†Calendar year was modelled as a continuous variable; adjusted for temporal changes in maternal age, BMI, race, education, smoking, marital status, parity, chronic hypertension, pre-pregnancy diabetes, assisted conception, health insurance provider, gestational age, SGA infant, sex, and congenital anomalies.

**Table 3.** Gestational age-specific rates of neonatal death by subtype of preterm birth, Washington State, U.S.A., 2004-2013.

| Gestational age category and preterm birth subtype | Neonatal death                    |           | Rate ratio (95% CI) | Adjusted odds ratio per 1-year change† (95% CI) |
|----------------------------------------------------|-----------------------------------|-----------|---------------------|-------------------------------------------------|
|                                                    | N (per 100 live births) 2004-2006 | 2011-2013 |                     |                                                 |
| 24-27 weeks                                        |                                   |           |                     |                                                 |
| PPROM                                              | 27 (14.9)                         | 18 (13.9) | 0.93 (0.51-1.69)    | 1.05 (0.94-1.17)                                |
| Spontaneous labor                                  | 21 (15.6)                         | 26 (13.8) | 0.88 (0.50-1.57)    | 0.95 (0.86-1.06)                                |
| Clinician-initiated                                | 28 (16.2)                         | 41 (14.7) | 0.91 (0.56-1.47)    | 0.94 (0.86-1.03)                                |
| 28-31 weeks                                        |                                   |           |                     |                                                 |
| PPROM                                              | 14 (4.8)                          | 5 (1.9)   | 0.40 (0.14-1.10)    | 0.92 (0.78-1.07)                                |
| Spontaneous labor                                  | 11 (3.1)                          | 9 (2.2)   | 0.71 (0.30-1.71)    | 0.91 (0.77-1.06)                                |
| Clinician-initiated                                | 30 (6.2)                          | 26 (3.8)  | 0.61 (0.36-1.04)    | 0.96 (0.88-1.06)                                |
| 32-33 weeks                                        |                                   |           |                     |                                                 |
| PPROM                                              | 2 (0.5)                           | 5 (1.2)   | 2.40 (0.47-12.37)   | 1.08 (0.80-1.45)                                |
| Spontaneous labor                                  | 7 (1.3)                           | 5 (0.8)   | 0.62 (0.20-1.94)    | 0.97 (0.83-1.13)                                |
| Clinician-initiated                                | 14 (2.5)                          | 8 (1.0)   | 0.40 (0.17-0.95)    | 0.85 (0.74-0.97)                                |
| 34-36 weeks                                        |                                   |           |                     |                                                 |
| PPROM                                              | 14 (0.7)                          | 7 (0.4)   | 0.57 (0.23-1.42)    | 0.97 (0.84-1.12)                                |
| Spontaneous labor                                  | 7 (0.1)                           | 22 (0.4)  | 4.00 (1.71-9.36)    | 1.08 (0.96-1.20)                                |
| Clinician-initiated                                | 22 (0.5)                          | 35 (0.8)  | 1.60 (0.94-2.73)    | 1.10 (1.01-1.20)                                |
| All (24-36 weeks)                                  |                                   |           |                     |                                                 |
| PPROM                                              | 57 (2.1)                          | 35 (1.4)  | 0.67 (0.44-1.02)    | 1.00 (0.93-1.07)                                |
| Spontaneous labor                                  | 46 (0.7)                          | 62 (0.9)  | 1.29 (0.88-1.88)    | 0.98 (0.92-1.04)                                |
| Clinician-initiated                                | 94 (1.6)                          | 110 (1.7) | 1.06 (0.81-1.40)    | 0.98 (0.94-1.03)                                |

PPROM, preterm premature rupture of membranes; CI, confidence interval

Adjusted odds ratios express the average annual change in the odds of neonatal death.

†Calendar year was modelled as a continuous variable; adjusted for temporal changes in maternal age, BMI, race, education, smoking, marital status, parity, chronic hypertension, pre-pregnancy diabetes, assisted conception, health insurance provider, gestational age, SGA infant, sex, and congenital anomalies.

### **Composite outcome: Neonatal Mortality or Severe Morbidity**

The rate of combined mortality or severe morbidity increased from 7.9% in 2004-2006 to 11.9% in 2011-2013 (RR 1.51, 95% CI 1.40-1.62; average change per year AOR 1.06, 95% CI 1.05-1.08; Table 2). This increase was predominately due to an increase in combined mortality or severe morbidity among infants born at 32-33 weeks and 34-36 weeks' gestation (RR 1.44, 95% CI 1.19-1.74, and RR 2.16, 95% CI 1.89-2.47, respectively); the relative average increase in the odds of combined neonatal mortality or severe morbidity was 5% per year among infants born at 32-33 weeks (AOR 1.05, 95% CI 1.02-1.08), and 10% per year among infants born at 34-36 weeks (AOR 1.10, 95% CI 1.08-1.12). Rate differences are shown in Appendix Table 3.

The rate of composite neonatal mortality or severe morbidity increased in each preterm birth subtype (all  $p < 0.001$ , Table 4). The rate was highest among infants born following PPROM (14.8%), and these infants had the largest relative increase (10% per year) in combined mortality or severe morbidity over the study period (AOR 1.10, 95% CI 1.07-1.13). Gestational age-specific analyses of trends in combined neonatal mortality or severe morbidity showed an increase in the rates among infants born at 34-36 weeks in all subtypes of preterm birth (PPROM: RR 2.20, 95% CI 1.64-2.96; spontaneous: RR 2.32, 95% CI 1.85-2.90; clinician-initiated: RR 2.04, 95% CI 1.65-2.51; Table 4), and increases in the rates among infants born following PPROM at 28-31 weeks (AOR 1.07, 95% CI 1.02-1.13) and 32-33 weeks (AOR 1.12, 95% CI 1.06-1.19). In addition, a significant increase in combined neonatal mortality or severe morbidity was observed among infants born following spontaneous-onset of labor at 24-27 weeks' gestation (AOR 1.09, 95% CI 1.01-1.17). In contrast, clinician-initiated delivery at 24-27 weeks was associated with a decline in the rate of composite adverse outcome (AOR 0.93, 95% CI 0.87-0.99).

**Table 4.** Gestational age-specific rates of neonatal death/severe morbidity by subtype of preterm birth, Washington State, U.S.A., 2004-2013.

| Gestational age category and preterm birth subtype | Neonatal death/severe morbidity |            | Rate ratio (95% CI) | Adjusted odds ratio per 1-year change† (95% CI) |
|----------------------------------------------------|---------------------------------|------------|---------------------|-------------------------------------------------|
|                                                    | N (per 100 live births)         |            |                     |                                                 |
|                                                    | 2004-2006                       | 2011-2013  |                     |                                                 |
| 24-27 weeks                                        |                                 |            |                     |                                                 |
| PPROM                                              | 133 (73.5)                      | 98 (75.4)  | 1.03 (0.79-1.33)    | 1.01 (0.94-1.10)                                |
| Spontaneous labor                                  | 89 (65.9)                       | 142 (75.1) | 1.14 (0.87-1.49)    | 1.09 (1.01-1.17)                                |
| Clinician-initiated                                | 131 (75.7)                      | 189 (67.7) | 0.89 (0.72-1.12)    | 0.93 (0.87-0.99)                                |
| 28-31 weeks                                        |                                 |            |                     |                                                 |
| PPROM                                              | 101 (34.2)                      | 112 (42.4) | 1.24 (0.95-1.62)    | 1.07 (1.02-1.13)                                |
| Spontaneous labor                                  | 112 (31.4)                      | 144 (34.6) | 1.10 (0.86-1.41)    | 1.02 (0.98-1.08)                                |
| Clinician-initiated                                | 170 (35.2)                      | 240 (35.5) | 1.01 (0.83-1.23)    | 1.02 (0.98-1.06)                                |
| 32-33 weeks                                        |                                 |            |                     |                                                 |
| PPROM                                              | 42 (11.0)                       | 90 (22.0)  | 2.00 (1.39-2.88)    | 1.12 (1.06-1.19)                                |
| Spontaneous labor                                  | 60 (11.3)                       | 87 (13.4)  | 1.19 (0.85-1.65)    | 1.01 (0.96-1.07)                                |
| Clinician-initiated                                | 64 (11.5)                       | 125 (15.8) | 1.37 (1.02-1.86)    | 1.04 (0.99-1.08)                                |
| 34-36 weeks                                        |                                 |            |                     |                                                 |
| PPROM                                              | 67 (3.5)                        | 129 (7.7)  | 2.20 (1.64-2.96)    | 1.13 (1.08-1.18)                                |
| Spontaneous labor                                  | 111 (1.9)                       | 245 (4.4)  | 2.32 (1.85-2.90)    | 1.09 (1.06-1.13)                                |
| Clinician-initiated                                | 129 (2.8)                       | 265 (5.7)  | 2.04 (1.65-2.51)    | 1.10 (1.07-1.13)                                |
| All (24-36 weeks)                                  |                                 |            |                     |                                                 |
| PPROM                                              | 343 (12.4)                      | 429 (17.3) | 1.40 (1.21-1.61)    | 1.10 (1.07-1.13)                                |
| Spontaneous labor                                  | 372 (5.5)                       | 618 (9.1)  | 1.65 (1.45-1.88)    | 1.06 (1.04-1.09)                                |
| Clinician-initiated                                | 494 (8.6)                       | 819 (12.9) | 1.50 (1.34-1.68)    | 1.05 (1.03-1.07)                                |

PPROM, preterm premature rupture of membranes; CI, confidence interval, severe morbidity includes BPD, IVH grade $\geq$ 3, PVL, ROP, NEC, neonatal sepsis, convulsions of newborn, and severe birth trauma.

Adjusted odds ratios express the average annual change in the odds of neonatal death and/or morbidity.

†Calendar year was modelled as a continuous variable; adjusted for temporal changes in maternal age, BMI, race, education, smoking, marital status, parity, chronic hypertension, pre-pregnancy diabetes, assisted conception, health insurance provider, gestational age, SGA infant, sex, and congenital anomalies.

### Additional analyses

The most prominent temporal trend in the rates of specific severe neonatal morbidities was an increase in the rate of neonatal sepsis, from 4.5% in 2004-06 to 8.5% in 2011-2013 (AOR 1.09, 95% CI 1.08-1.11). The rate of sepsis increased substantially among late preterm infants from 1.7% to 4.5% (AOR 1.12, 95% CI 1.10-1.14), infants born at 28-33 weeks (AOR 1.07, 95% CI

1  
2  
3 1.05-1.10), and those born at 24-27 weeks (AOR 1.05, 95% CI 1.01-1.09). In contrast, the rate of  
4 BPD among preterm infants decreased from 2.0% to 1.7% (AOR 0.95, 95% CI 0.93-0.98;  
5 Appendix Table 4), mainly in infants born at 28-33 weeks (AOR 0.93, 95% CI 0.89-0.97).  
6  
7  
8  
9  
10  
11

## 12 **DISCUSSION**

13  
14 Our findings show a decline in the preterm birth rate in Washington State between 2004 and  
15 2013 that was predominately due to a decline in spontaneous preterm birth (PPROM and  
16 spontaneous preterm labor), while clinician-initiated preterm deliveries increased slightly. These  
17 changes were associated with increased mortality among late preterm infants born following  
18 clinician-initiated delivery and increased rates of the composite outcome of neonatal mortality or  
19 severe morbidity among all late preterm infants. The rise in neonatal morbidity was driven  
20 mainly by the increase in the rate of neonatal sepsis.  
21  
22  
23  
24  
25  
26  
27  
28  
29

30  
31 After a large increase in the preterm birth rate in the United States in the early 2000s, a  
32 decline was observed from 12.8% in 2006 to 9.8% in 2015.(4–8) A recent study by Gyamfi-  
33 Bannerman *et al.* showed a decline in both clinician-initiated and spontaneous preterm birth rates  
34 between 2005 and 2012.(10) Our study provides more detailed information on preterm birth  
35 categories and describes temporal trends in neonatal outcomes adjusted for changes in important  
36 risk factors.  
37  
38  
39  
40  
41  
42  
43

44  
45 Obstetric interventions, changes in practice patterns, and implementation of specific  
46 evidence-based guidelines for high-risk women may be reasons behind the decline in preterm  
47 birth following spontaneous onset of labor. The use of 17  $\alpha$ -hydroxyprogesterone caproate (17P)  
48 for women with previous spontaneous preterm births, and the use of vaginal progesterone for  
49 select women with short cervical length and without prior preterm birth progressively increased  
50  
51  
52  
53  
54  
55  
56  
57



1  
2  
3 between 2006 and 2013 and may have led to a decline in spontaneous preterm births.(6,25–29)  
4  
5 More aggressive pursuit of expectant management in PPRM, preeclampsia and intrauterine  
6  
7 growth restriction may have led to a delivery at later gestation in high-risk mothers.(30–32)  
8  
9  
10 Other changes including declines in births to teenage mothers may have contributed to an overall  
11  
12 decline in the preterm birth rate, while increases in maternal age, obesity, and assisted  
13  
14 conception have likely contributed to an increase in clinician-initiated delivery in general.(33–  
15  
16  
17 35)

18  
19 In 1999 and 2009, the American College of Obstetrics and Gynecologists (ACOG)  
20  
21 advocated against elective deliveries under 39 weeks of gestation in an effort to prevent non-  
22  
23 medically-indicated preterm births and the potentially avoidable morbidity associated with these  
24  
25 deliveries.(36,37) Previous studies have shown that timely medically-indicated clinician-initiated  
26  
27 delivery can prevent stillbirth and reduce neonatal mortality.(23,38,39) A population-based study  
28  
29 of all births in the United States showed that the 68% increase in clinician-initiated preterm  
30  
31 births between 1995 and 2005 was not associated with increased rates of neonatal  
32  
33 mortality/morbidity.(5) In our study, the small increase in clinician-initiated interventions was  
34  
35 associated with reduced mortality at 32-33 weeks and reduced mortality/severe morbidity at 24-  
36  
37 27 weeks. However, at late preterm, declines in spontaneous and PPRM birth and increases in  
38  
39 clinician-initiated delivery were associated with increased rates of mortality/severe morbidity.  
40  
41 This may be due temporal increase in maternal chronic morbid conditions that we did not adjust  
42  
43 for in our study, for example, asthma, autoimmune conditions, or respiratory morbidity.  
44  
45  
46  
47  
48

49 The increase in neonatal sepsis was observed in all subtypes of late preterm birth, which  
50  
51 points to possible common causes relatively independent of delivery type. However, the  
52  
53 pathology of neonatal sepsis can vary by preterm birth subtype (for example, originating from  
54  
55  
56  
57



1  
2  
3 the effects of chorioamnionitis in PPRM, or IUGR in clinician-initiated delivery), and the  
4  
5 uniform increase may be due to the broad definition of sepsis in our study, which included early  
6  
7 and late onset sepsis. This unfavorable trend in adverse neonatal outcomes in our study thus  
8  
9 warrants further investigation, as prior studies of clinical sepsis (defined broadly as ‘other  
10  
11 infection specific to neonatal period’) in the first 3 months after birth showed a small decline  
12  
13 between 1988 and 2006 among preterm infants in the U.S.A.(40) The reasons behind the  
14  
15 increased rates of sepsis in our study may include temporal changes in the proportion of  
16  
17 vulnerable infants, increased use of antenatal steroids, or changes in antibiotic use and antibiotic  
18  
19 resistance.(40,41) Currently, there is lack of clinical diagnostic criteria or ideal laboratory marker  
20  
21 for neonatal sepsis with excellent sensitivity for daily clinical operations, rendering the  
22  
23 assessment of variation in the incidence rates of neonatal sepsis difficult.(41–43) Antibiotics are  
24  
25 essential in the treatment of bacterial sepsis, and are the most commonly used medications in  
26  
27 neonatal intensive units; however, overly liberal antimicrobial use has been associated with  
28  
29 increased adverse neonatal outcomes.(44) A large population study in California showed  
30  
31 substantial variations in antibiotic use that was not related to proven infection, NEC, surgical  
32  
33 case volume, or Neonatal Intensive Care Unit (NICU) mortality, especially among community  
34  
35 and intermediate NICUs.(44) Unified diagnostic criteria and antimicrobial policies are needed to  
36  
37 further examine and address this issue.  
38  
39  
40  
41  
42  
43

44  
45 The strengths of our study include a large population-based database with detailed  
46  
47 information on demographic and clinical risk factors (e.g., BMI, assisted conception) and  
48  
49 obstetric history (e.g., parity, prior adverse outcomes). We were, therefore, able to adjust for  
50  
51 temporal changes in a large spectrum of known risk factors for preterm birth. Data on pregnancy  
52  
53 and birth outcomes were collected consistently over the study period, and neonatal morbidity  
54  
55  
56  
57

1  
2  
3 was also coded consistently using exclusively ICD-9-CM during the entire study period. The  
4 ICD-9-CM code for neonatal sepsis did not change over the study period, and there was no  
5  
6 ICD-9-CM code for neonatal sepsis did not change over the study period, and there was no  
7  
8 indication of any major changes in clinical diagnostic criteria.  
9

10 This study has a few limitations. First, clinical details on severity of some neonatal  
11 morbidity were not available, for example, the NEC Stage I or ROP Grade I, both of which can  
12 be treated conservatively. This led to the inclusion of infants with less severe NEC and ROP or  
13 other components of the composite outcome. Second, the ICD-9-CM code for neonatal sepsis did  
14 not differentiate between sepsis confirmed by blood or cerebrospinal fluid culture and a clinical  
15 diagnosis of sepsis without microbiological confirmation, or between early-onset and late-onset  
16 sepsis. This could lead to over-diagnosis of neonatal infection. Third, information on iatrogenic  
17 termination of pregnancy was not available, thus we could not account for these temporal  
18 changes. However, the vast majority of iatrogenic pregnancy terminations is likely to occur prior  
19 to 24 weeks gestation; terminations beyond 23 weeks would be included as stillbirths in this  
20 study. Temporal changes in gestational age-specific stillbirth rates showed small increases in  
21 stillbirth rates at 24-27 weeks and 28-31 weeks, which augments the upward trend in adverse  
22 neonatal outcome (mortality or severe morbidity) at 28-31 weeks gestation. Fourth, potential  
23 errors and omissions are inevitable in large databases; these may have led to non-differential  
24 misclassification, which may have resulted in the underestimation of temporal trends. Fifth, the  
25 data sources had detailed information on mode of delivery that allowed accurate categorization  
26 of preterm birth subtypes; however, this categorization may have overestimated the proportion of  
27 deliveries following PPROM.<sup>(45)</sup> Data collection had not changed over the study period,  
28 however, changes in physician's preferences for specific mode of delivery (e.g., trial of labor  
29 before cesarean delivery) may be responsible for year-to-year fluctuation in temporal trends in  
30  
31  
32  
33  
34  
35  
36  
37  
38  
39  
40  
41  
42  
43  
44  
45  
46  
47  
48  
49  
50  
51  
52  
53  
54  
55  
56  
57  
58  
59  
60

1  
2  
3 preterm birth subtypes. Lastly, a relatively large number of temporal trends were assessed,  
4  
5 possibly rendering some trends statistically significant due to chance. In addition, singleton  
6  
7 infants excluded due to out-of-hospital delivery or missing values may have impacted our results,  
8  
9 however, non-hospital births are more likely to be term deliveries without complications  
10  
11 requiring hospitalization.  
12  
13

14 Washington State has one of the lowest preterm birth rates in the USA, and lowest infant  
15  
16 mortality rates;(46) however, the ranking is very much dependent on the ethnicity, age, and  
17  
18 socioeconomic status composition of the obstetric population.(46) We adjusted for a number of  
19  
20 these indices thus our results are relevant to other states in the U.S.A. and high-income countries  
21  
22 in general.  
23  
24  
25  
26  
27  
28  
29  
30  
31  
32  
33  
34  
35  
36  
37  
38  
39  
40  
41  
42  
43  
44  
45  
46  
47  
48  
49  
50  
51  
52  
53  
54  
55  
56  
57  
58  
59  
60

## CONCLUSION

Our objectives were to assess temporal trends in gestational age-specific rates of neonatal mortality and a composite outcome of neonatal mortality or severe morbidity among preterm infants. The small decline in the preterm birth rate in Washington State from 2004 to 2013 was predominantly due to a decline in the rates of spontaneous onset of labor and PPRM at late preterm. This was associated with increased neonatal mortality among late preterm infants born following clinician-initiated delivery, and increased rate of composite outcome including neonatal death or severe morbidity among all late preterm infants. The increase in adverse neonatal outcomes among late preterm infants and increase in sepsis rates among all preterm infants warrant further investigation. Our results are important for identifying areas for improvement in obstetric and neonatal health care, and serve as hypothesis generating findings to direct further research.

1  
2  
3 List of tables:  
4

5 Table 1. Maternal and infant characteristics among all singleton infants born at  $\geq 24$  weeks'  
6 gestation), Washington State, U.S.A., 2004-2013.  
7

8 Table 2. Gestational age-specific rates of adverse neonatal outcomes among singleton preterm  
9 infants, Washington State, U.S.A., 2004-2013.  
10

11 Table 3. Gestational age-specific rates of neonatal death by subtype of preterm birth, Washington  
12 State, U.S.A., 2004-2013.  
13

14 Table 4. Gestational age-specific rates of neonatal death/severe morbidity by subtype of preterm  
15 birth, Washington State, U.S.A., 2004-2013.  
16  
17

18  
19 List of figures:  
20

21 Figure 1. Temporal trends in the rates of singleton preterm birth following preterm premature  
22 rupture of membranes (PPROM), spontaneous labor and clinician-initiated delivery, Washington  
23 State, U.S.A., 2004-2013.  
24

25 Figure 2. Temporal trends in gestational-age specific preterm birth rates following preterm  
26 premature rupture of membranes (PPROM), spontaneous labor and clinician-initiated delivery; at  
27 24-27 weeks (Panel A), 28-31 weeks (Panel B), 32-33 weeks (Panel C), and 34-36 weeks (Panel  
28 D); Washington State, U.S.A., 2004-2013.  
29  
30

31  
32  
33 Supplement:  
34

35 Supplemental File 1: Washington State Birth Filing Form – sample.  
36

37 Appendix Table 1. Severe neonatal morbidity components and ICD-9-CM codes.  
38

39 Appendix Figure 1. Study population flow chart, Washington State, U.S.A., 2004-2013.  
40

41 Appendix Figure 2. Gestational age-specific rates of stillbirths calculated using the fetuses-at-  
42 risk (FAR) approach, Washington State, U.S.A., 2004-2013.  
43

44 Appendix Table 2. Preterm live births by gestational age categories and clinical subtype,  
45 Washington State, U.S.A., 2004-2013.  
46

47 Appendix Table 3 Gestational age-specific rates of adverse neonatal outcomes among singleton  
48 preterm infants, Washington State, U.S.A., 2004-2013.  
49

50 Appendix Table 4. Temporal trends in gestational-specific rates of severe neonatal morbidity  
51 components, Washington State, U.S.A., 2004-2013.  
52  
53  
54  
55  
56  
57

1. Goldenberg RL, Culhane JF, Iams JD, Romero R. Epidemiology and causes of preterm birth. *Lancet*. 2008;371(9606):75–84.
2. Saigal S, Doyle LW. An overview of mortality and sequelae of preterm birth from infancy to adulthood. *Lancet*. 2008;371(9608):261–9.
3. Kramer MS. The contribution of mild and moderate preterm birth to infant mortality. *JAMA*. 2000;284(7):843–9.
4. Martin J, Osterman M, Sutton P. Are preterm births on the decline in the United States? Recent data from the National Vital Statistics System. *NCHS Data Brief*. 2010;39:1–8.
5. Lisonkova S, Hutcheon JA, Joseph K. Temporal trends in neonatal outcomes following iatrogenic preterm delivery. *BMC Pregnancy Childbirth*. 2011;11(1):39–47.
6. Schoen CN, Tabbah S IJ. Why the United States preterm birth rate is declining. *AJOG*. 2015;213(2):175–80.
7. Martin J, Hamilton B, Osterman M. Births: Final data for 2015. Vol. 66, National Vital Statistics Report. 2017.
8. Hamilton B, Martin J, Osterman M. Births: Provisional data for 2016. 2017.
9. Villar J, Papageorghiou AT, Knight HE, Gravett MG, Iams J, Waller SA, et al. The preterm birth syndrome: a prototype phenotypic classification. *AJOG* [Internet]. 2012;206(2):119–23. Available from: <http://dx.doi.org/10.1016/j.ajog.2011.10.866>
10. Gyamfi-Bannerman C, Ananth C V. Trends in spontaneous and indicated preterm delivery among singleton gestations in the United States, 2005-2012. *Obstet Gynecol*. 2014;124(6):1069–74.
11. Ananth C V, Vintzileos AM. Maternal-fetal conditions necessitating a medical intervention resulting in preterm birth. *Am J Obstet Gynecol*. 2006;195:1557–63.

12. Reddy UM, Ko CW, Raju TNK, Willinger M. Delivery indications at late-preterm gestations and infant mortality rates in the United States. *Pediatrics*. 2009;124:234–40.
13. Morken NH, Källen K, Jacobsson B. Outcomes of preterm children according to type of delivery onset: A nationwide population-based study. *Paediatr Perinat Epidemiol*. 2007;
14. Kamath-Rayne BD, DeFranco EA, Chung E, Chen A. Subtypes of preterm birth and the risk of postneonatal death. *J Pediatr*. 2013;162(1):28–34.
15. Chen A, Feresu SA, Barsoom MJ. Heterogeneity of preterm birth subtypes in relation to neonatal death. *Obstet Gynecol*. 2009;114(3):516–22.
16. Washington State Department of Health Center for Health Statistics. Birth data quality technical notes [Internet]. 2016. Available from:  
<http://www.doh.wa.gov/Portals/1/Documents/5300/TechnicalNotes.pdf>
17. Hospital Inpatient Discharge Database Reports. CHARS reports 2010-2016. 2016.
18. Washington State Department of Health Comprehensive Abstract Reporting System. Procedure manual for submitting discharge data UB-40 and 837I 5010. 2013.
19. Lydon-Rochelle M, Holt V, Cardenas V. The reporting of pre-existing maternal medical conditions and complications of pregnancy on birth certificates and in hospital discharge data. *AJOG*. 2005;193(1):125–34.
20. Lydon-Rochelle M, Holt V, Nelson J. Accuracy of reporting maternal in-hospital diagnoses and intrapartum procedures in Washington State linked birth records. *Paediatr Perinat Epidemiol*. 2005;19(6):460–71.
21. Alexander GR, Himes JH, Kaufman RB, Mor J, Kogan M. A United States national reference for fetal growth. [Internet]. Vol. 87, *Obstetrics and gynecology*. 1996. p. 163–8. Available from: <http://www.ncbi.nlm.nih.gov/pubmed/8559516>

- 1  
2  
3 22. Joseph KS. Incidence-based measures of birth, growth restriction, and death can free  
4 perinatal epidemiology from erroneous concepts of risk. *J Clin Epidemiol*.  
5  
6 2004;57(9):889–97.  
7
- 8  
9  
10 23. Joseph KS. Theory of obstetrics: An epidemiologic framework for justifying medically  
11 indicated early delivery. *BMC Pregnancy Childbirth*. 2007;7:1–15.  
12
- 13  
14 24. Wasserstein RL, Lazar NA. The ASA’s statement on p -Values: context, process, and  
15 purpose. *Am Stat* [Internet]. 2016;70(2):129–33. Available from:  
16  
17 <https://www.tandfonline.com/doi/full/10.1080/00031305.2016.1154108>  
18
- 19  
20 25. Gyamfi-Bannerman C, Thom EA, Blackwell SC, Tita ATN, Reddy UM, Saade GR, et al.  
21 Antenatal betamethasone for women at risk for late preterm delivery. *N Engl J Med*.  
22  
23 2016;374(14):1311–20.  
24
- 25  
26 26. Henderson Z, Power M, Berghella V. Attitudes and practices regarding use of  
27 progesterone to prevent preterm births. *Am J Perinatol*. 2009;26(7):529–36.  
28
- 29  
30 27. Fonseca E, Celik E, Parra M. Progesterone and the risk of preterm birth among women  
31 with a short cervix. *NEJM*. 2007;357(5):462–9.  
32
- 33  
34 28. Berghella V, Rafael T, Szychowski J. Cerclage for short cervix on ultrasonography in  
35 women with singleton gestations and previous preterm birth: a meta-analysis. *Obs*  
36  
37 *Gynecol*. 2011;117(3):663–71.  
38
- 39  
40 29. Werner E, Han C, Pettker C. Universal cervical-length screening to prevent preterm birth:  
41 a cost-effectiveness analysis. *Ultrasound Obs Gynecol*. 2011;38(1):32–7.  
42
- 43  
44 30. Morris J, Roberts C, Bowen J. Immediate delivery compared with expectant management  
45 after preterm pre-labour rupture of the membranes close to term (PPROMT trial): a  
46  
47 randomised controlled trial. *Lancet*. 2016;387:444–52.  
48  
49  
50  
51  
52  
53  
54  
55  
56  
57



- 1
  - 2
  - 3
  - 4
  - 5
  - 6
  - 7
  - 8
  - 9
  - 10
  - 11
  - 12
  - 13
  - 14
  - 15
  - 16
  - 17
  - 18
  - 19
  - 20
  - 21
  - 22
  - 23
  - 24
  - 25
  - 26
  - 27
  - 28
  - 29
  - 30
  - 31
  - 32
  - 33
  - 34
  - 35
  - 36
  - 37
  - 38
  - 39
  - 40
  - 41
  - 42
  - 43
  - 44
  - 45
  - 46
  - 47
  - 48
  - 49
  - 50
  - 51
  - 52
  - 53
  - 54
  - 55
  - 56
  - 57
  - 58
  - 59
  - 60
31. Koopmans C, Bijlenga D, Groen H. Induction of labour versus expectant monitoring for gestational hypertension or mild pre-eclampsia after 36 weeks' gestation (HYPITAT): a multicentre, open-label randomised controlled trial. *Lancet*. 2009;374:979–88.
32. Lees C, Marlow N, Arabin B. Perinatal morbidity and mortality in early-onset fetal growth restriction: cohort outcomes of the trial of randomized umbilical and fetal flow in Europe (TRUFFLE). *Ultrasound Obs Gynecol*. 2013;42(2):400–8.
33. Ogden C, Carroll M, Kit B. Prevalence of childhood and adult obesity in the United States. *JAMA*. 2014;311(8):806–14.
34. Lisonkova S, Muraca G, Potts J. Association between prepregnancy body mass index and severe maternal morbidity. *JAMA*. 2017;318(18):1777–86.
35. Lisonkova S, Potts J, Muraca G. Maternal age and severe maternal morbidity: population-based retrospective cohort study. *PLoS Med*. 2017;14(5):e1002307.
36. American College of Obstetricians and Gynecologists. Induction of labor ACOG practice bulletin no. 10. 1999.
37. American College of Obstetricians and Gynecologists. Induction of labor ACOG practice bulletin no. 107. 2009.
38. Chang HH, Larson J BH. Preventing preterm births: analysis of trends and potential reductions with interventions in 39 countries with very high human development index. *Lancet*. 2013;381:223–34.
39. Lisonkova S, Sabr Y, Butler B. International comparisons of preterm birth rates: higher rates of late preterm birth are associated with lower rates of stillbirth and neonatal death. *BJOG*. 2012;119(13):1630–9.
40. Lukacs S, Schrag S. Clinical sepsis in neonates and young infants, United States, 1988-

- 1  
2  
3 2006. *J Pediatr.* 2012;160(6):960–5.  
4  
5  
6 41. Ting JY, Synnes A, Roberts A, Deshpandey A, Dow K, Yoon EW, et al. Association  
7 between antibiotic use and neonatal mortality and morbidities in very low-birth-weight  
8 infants without culture-proven sepsis or necrotizing enterocolitis. *JAMA Pediatr.*  
9  
10 2016;170(12):1181–7.  
11  
12  
13  
14 42. Wynn JL. Defining neonatal sepsis. *Curr Opin Pediatr.* 2016;28(2):135–40.  
15  
16  
17 43. Ng P, Ma T, Lam H. The use of laboratory biomarkers for surveillance, diagnosis and  
18 prediction of clinical outcomes in neonatal sepsis and necrotising enterocolitis. *Arch Dis*  
19  
20  
21  
22  
23 Child Fetal Neonatal Ed. 2015;100(5):F448–52.  
24  
25 44. Schulman J, Dimand R, Lee H. Neonatal intensive care unit antibiotic use. *Pediatrics.*  
26  
27 2015;135(5):826–33.  
28  
29 45. Stout M, Macones G, Tuuli M. Accuracy of birth certificate data for classifying preterm  
30 birth. *Paediatr Perinat Epidemiol.* 2017;31(3):245–9.  
31  
32  
33 46. March of Dimes. Premature birth report card.  
34  
35 <https://www.marchofdimes.org/peristats/tools/reportcard.aspx?frmodrc=1&reg=53>, Accessed  
36  
37 Aug 25, 2018.  
38  
39  
40  
41  
42  
43  
44  
45  
46  
47  
48  
49  
50  
51  
52  
53  
54  
55  
56  
57  
58  
59  
60

1  
2  
3  
4  
5  
6  
7  
8  
9  
10  
11  
12  
13  
14  
15  
16  
17  
18  
19  
20  
21  
22  
23  
24  
25  
26  
27  
28  
29  
30  
31  
32  
33  
34  
35  
36  
37  
38  
39  
40  
41  
42  
43  
44  
45  
46  
47  
48  
49  
50  
51  
52  
53  
54  
55  
56  
57  
58  
59  
60

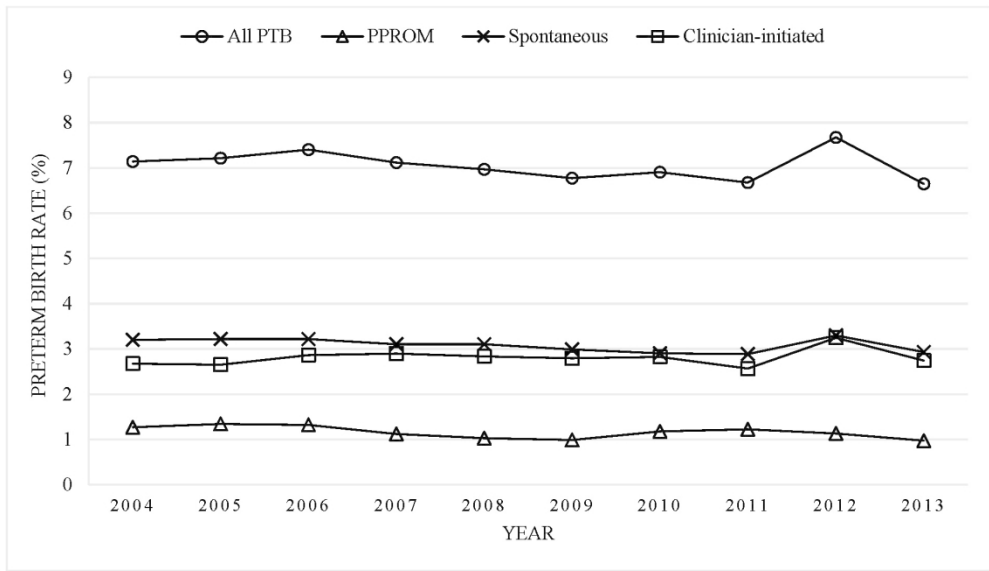

Figure 1. Temporal trends in the rates of singleton preterm birth following preterm premature rupture of membranes (PPROM), spontaneous labor and clinician-initiated delivery, Washington State, U.S.A., 2004-2013.

163x93mm (300 x 300 DPI)

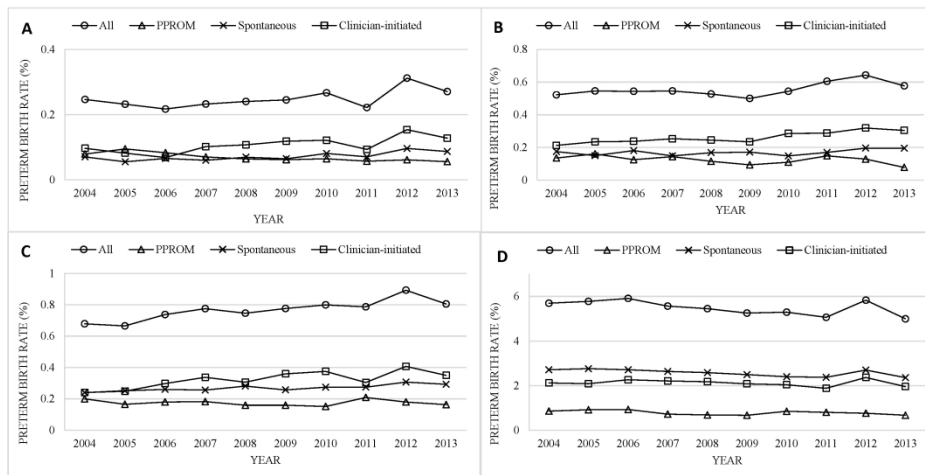

Figure 2. Temporal trends in gestational-age specific preterm birth rates following preterm premature rupture of membranes (PPROM), spontaneous labor and clinician-initiated delivery; at 24-27 weeks (Panel A), 28-31 weeks (Panel B), 32-33 weeks (Panel C), and 34-36 weeks (Panel D); Washington State, U.S.A., 2004-2013.

279x215mm (300 x 300 DPI)

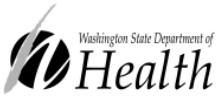

# Washington State Birth Filing Form

## For Hospital Use Only

|                            |                           |
|----------------------------|---------------------------|
| Mother's Medical Record #: | Child's Medical Record #: |
|----------------------------|---------------------------|

Plurality:  1- single birth     2- twin     3- triplet     Other \_\_\_\_\_

If multiple, this worksheet is for child:  1- first born     2- second born     3- third born     Other \_\_\_\_\_

## Child's Information

|                                                                                                                                                                                                                                                                              |        |                                                                                         |
|------------------------------------------------------------------------------------------------------------------------------------------------------------------------------------------------------------------------------------------------------------------------------|--------|-----------------------------------------------------------------------------------------|
| <b>*1. Child's Name</b>                                                                                                                                                                                                                                                      |        |                                                                                         |
| First                                                                                                                                                                                                                                                                        | Middle | Last                                                                                    |
| <b>*2. Child's Date of Birth</b> (MM/DD/YYYY)<br>/ /                                                                                                                                                                                                                         |        | <b>*3. Time of Birth</b>                                                                |
|                                                                                                                                                                                                                                                                              |        | <b>*4. Child's Sex</b><br><input type="checkbox"/> Male <input type="checkbox"/> Female |
| 5. Type of Birthplace<br><input type="checkbox"/> Hospital <input type="checkbox"/> Home<br><input type="checkbox"/> Enroute <input type="checkbox"/> Clinic/Doctor's Office<br><input type="checkbox"/> Freestanding Birth Center <input type="checkbox"/> Other (specify): |        | 6. Planned Birth Place, if different (specify):                                         |
| <b>*7. Name of Facility</b> (If not a facility, enter name of place and address)                                                                                                                                                                                             |        | <b>*8. County of Birth</b>                                                              |
|                                                                                                                                                                                                                                                                              |        | <b>*9. City of Birth</b>                                                                |

## Mother's Information

|                                                                                                                                                                                                                                                                                                                                                                                                                                                                                                                                                                                                                                                                                                                                                                                        |                                                         |                                                               |
|----------------------------------------------------------------------------------------------------------------------------------------------------------------------------------------------------------------------------------------------------------------------------------------------------------------------------------------------------------------------------------------------------------------------------------------------------------------------------------------------------------------------------------------------------------------------------------------------------------------------------------------------------------------------------------------------------------------------------------------------------------------------------------------|---------------------------------------------------------|---------------------------------------------------------------|
| <b>10. Mother's Current Legal Name</b>                                                                                                                                                                                                                                                                                                                                                                                                                                                                                                                                                                                                                                                                                                                                                 |                                                         |                                                               |
| First                                                                                                                                                                                                                                                                                                                                                                                                                                                                                                                                                                                                                                                                                                                                                                                  | Middle                                                  | Last                                                          |
| <b>*11. Mother's Name on her Birth Certificate</b>                                                                                                                                                                                                                                                                                                                                                                                                                                                                                                                                                                                                                                                                                                                                     |                                                         |                                                               |
| First                                                                                                                                                                                                                                                                                                                                                                                                                                                                                                                                                                                                                                                                                                                                                                                  | Middle                                                  | Last/Maiden                                                   |
| <b>*12. Date of Birth</b> (MM/DD/YYYY)<br>/ /                                                                                                                                                                                                                                                                                                                                                                                                                                                                                                                                                                                                                                                                                                                                          |                                                         | <b>*13. Birthplace</b> (State, Territory, or Foreign Country) |
|                                                                                                                                                                                                                                                                                                                                                                                                                                                                                                                                                                                                                                                                                                                                                                                        |                                                         | <b>14. Social Security Number</b>                             |
| 15. Do you want to get a Social Security Number for your child? <input type="checkbox"/> Yes <input type="checkbox"/> No                                                                                                                                                                                                                                                                                                                                                                                                                                                                                                                                                                                                                                                               |                                                         |                                                               |
| 16a. Residence: Number and Street (e.g., 624 SE 5 <sup>th</sup> St.)                                                                                                                                                                                                                                                                                                                                                                                                                                                                                                                                                                                                                                                                                                                   |                                                         | Apt No.                                                       |
| 16b. If not U.S.: Country                                                                                                                                                                                                                                                                                                                                                                                                                                                                                                                                                                                                                                                                                                                                                              | 16c. State                                              | 16d. County                                                   |
| 16e. If you live on Tribal Reservation, give name                                                                                                                                                                                                                                                                                                                                                                                                                                                                                                                                                                                                                                                                                                                                      |                                                         | 16f. City or Town                                             |
|                                                                                                                                                                                                                                                                                                                                                                                                                                                                                                                                                                                                                                                                                                                                                                                        |                                                         | 16g. Zip Code + 4                                             |
| 16h. Inside City Limits?<br><input type="checkbox"/> Yes <input type="checkbox"/> No <input type="checkbox"/> Unknown                                                                                                                                                                                                                                                                                                                                                                                                                                                                                                                                                                                                                                                                  | 17. How Long at Current Residence?<br>Years:    Months: | 18. Telephone Number<br>( )                                   |
| 19a. Mailing Address, if different: Number and Street, or PO Box                                                                                                                                                                                                                                                                                                                                                                                                                                                                                                                                                                                                                                                                                                                       |                                                         | Apt No.                                                       |
| 19b. If not U.S.; Country                                                                                                                                                                                                                                                                                                                                                                                                                                                                                                                                                                                                                                                                                                                                                              | 19c. State                                              | 19d. City                                                     |
|                                                                                                                                                                                                                                                                                                                                                                                                                                                                                                                                                                                                                                                                                                                                                                                        |                                                         | 19e. Zip Code + 4                                             |
| 20. Occupation (type of work done during last year)                                                                                                                                                                                                                                                                                                                                                                                                                                                                                                                                                                                                                                                                                                                                    |                                                         | 21. Kind of Business/Industry (do not use company name)       |
| <b>22. Mother's Education</b><br>(Check the box that best describes the highest degree or level of school completed at the time of delivery.)                                                                                                                                                                                                                                                                                                                                                                                                                                                                                                                                                                                                                                          |                                                         |                                                               |
| 1 <input type="checkbox"/> 8 <sup>th</sup> grade or less (specify): _____<br>2 <input type="checkbox"/> 9 <sup>th</sup> - 12 <sup>th</sup> grade; no diploma<br>3 <input type="checkbox"/> High school graduate or GED<br>4 <input type="checkbox"/> Some college credit, but no degree<br>5 <input type="checkbox"/> Associate degree (AA, AS, etc.)<br>6 <input type="checkbox"/> Bachelor's degree (BA, AB, BS, etc.)<br>7 <input type="checkbox"/> Master's degree (MA, MS, MEd, MSW, MBA, etc.)<br>8 <input type="checkbox"/> Doctorate (PhD, EdD, etc.) or professional degree (MD, DDS, DVM, LLB, JD, etc.)                                                                                                                                                                     |                                                         |                                                               |
| <b>23. Mother of Hispanic Origin?</b><br>(Check the box that best describes whether the mother is Spanish/Hispanic/Latina or check "No" box if not Spanish/Hispanic/Latina.)                                                                                                                                                                                                                                                                                                                                                                                                                                                                                                                                                                                                           |                                                         |                                                               |
| 1 <input type="checkbox"/> No, not Spanish/Hispanic/Latina<br>2 <input type="checkbox"/> Yes, Mexican, Mexican American, Chicana<br>3 <input type="checkbox"/> Yes, Puerto Rican<br>4 <input type="checkbox"/> Yes, Cuban<br>5 <input type="checkbox"/> Yes, Other Spanish/Hispanic/Latina (specify): _____                                                                                                                                                                                                                                                                                                                                                                                                                                                                            |                                                         |                                                               |
| <b>24. Mother's Race</b> (check one or more)                                                                                                                                                                                                                                                                                                                                                                                                                                                                                                                                                                                                                                                                                                                                           |                                                         |                                                               |
| 1 <input type="checkbox"/> White<br>2 <input type="checkbox"/> Black or African American<br>3 <input type="checkbox"/> American Indian or Alaska Native<br>(Name of enrolled or principal tribe) _____<br>4 <input type="checkbox"/> Asian Indian    5 <input type="checkbox"/> Chinese<br>6 <input type="checkbox"/> Filipino    7 <input type="checkbox"/> Japanese<br>8 <input type="checkbox"/> Korean    9 <input type="checkbox"/> Vietnamese<br>10 <input type="checkbox"/> Other Asian (specify): _____<br>11 <input type="checkbox"/> Native Hawaiian    12 <input type="checkbox"/> Guamanian or Chamorro<br>13 <input type="checkbox"/> Samoan<br>14 <input type="checkbox"/> Other Pacific Islander (specify): _____<br>15 <input type="checkbox"/> Other (specify): _____ |                                                         |                                                               |

Continue on next page

|                                                                                                                                                                                                                                                                                                                                                                                                                                                                                                                                                                                                                                                                                                                                                                                                    |                                                                                                                                                                                                                                                                                                                                                                                                                                                                                                        |                                                                                                                                                                                                                                                                                                                                                                                                                                                                                                                                                                                                                                                                                                                                                                                                                                                                |
|----------------------------------------------------------------------------------------------------------------------------------------------------------------------------------------------------------------------------------------------------------------------------------------------------------------------------------------------------------------------------------------------------------------------------------------------------------------------------------------------------------------------------------------------------------------------------------------------------------------------------------------------------------------------------------------------------------------------------------------------------------------------------------------------------|--------------------------------------------------------------------------------------------------------------------------------------------------------------------------------------------------------------------------------------------------------------------------------------------------------------------------------------------------------------------------------------------------------------------------------------------------------------------------------------------------------|----------------------------------------------------------------------------------------------------------------------------------------------------------------------------------------------------------------------------------------------------------------------------------------------------------------------------------------------------------------------------------------------------------------------------------------------------------------------------------------------------------------------------------------------------------------------------------------------------------------------------------------------------------------------------------------------------------------------------------------------------------------------------------------------------------------------------------------------------------------|
| 25. Mother's Height<br>Feet: _____ Inches: _____                                                                                                                                                                                                                                                                                                                                                                                                                                                                                                                                                                                                                                                                                                                                                   | 26. Mother's Pre-Pregnancy Weight (pounds) _____                                                                                                                                                                                                                                                                                                                                                                                                                                                       | 27. Did Mother get WIC food for herself during pregnancy?<br><input type="checkbox"/> Yes <input type="checkbox"/> No                                                                                                                                                                                                                                                                                                                                                                                                                                                                                                                                                                                                                                                                                                                                          |
| 28. Cigarette Smoking Before and During Pregnancy<br><input type="checkbox"/> Yes <input type="checkbox"/> No                                                                                                                                                                                                                                                                                                                                                                                                                                                                                                                                                                                                                                                                                      |                                                                                                                                                                                                                                                                                                                                                                                                                                                                                                        | Average number of cigarettes or packs per day:<br># of cigarettes _____ # of packs _____<br>Three months before pregnancy _____ or _____<br>First three months of pregnancy _____ or _____<br>Second three months of pregnancy _____ or _____<br>Last three months of pregnancy _____ or _____                                                                                                                                                                                                                                                                                                                                                                                                                                                                                                                                                                 |
| <b>Mother's Marital Status</b>                                                                                                                                                                                                                                                                                                                                                                                                                                                                                                                                                                                                                                                                                                                                                                     |                                                                                                                                                                                                                                                                                                                                                                                                                                                                                                        |                                                                                                                                                                                                                                                                                                                                                                                                                                                                                                                                                                                                                                                                                                                                                                                                                                                                |
| 29. Is mother married? (Check only one box)                                                                                                                                                                                                                                                                                                                                                                                                                                                                                                                                                                                                                                                                                                                                                        |                                                                                                                                                                                                                                                                                                                                                                                                                                                                                                        |                                                                                                                                                                                                                                                                                                                                                                                                                                                                                                                                                                                                                                                                                                                                                                                                                                                                |
| <b>Important - Read before responding to marital status question:</b><br>If you were married at any time during your pregnancy, your spouse or partner is considered the other legal parent unless he or she completes a denial of paternity and another man acknowledges that he is the father (chapter 26.26 RCW). To add someone other than your spouse or partner to the birth certificate, an acknowledgment and denial of paternity needs to be completed by all parties (DOH form 422-032). Under Washington State law, a state-registered domestic partnership is considered the same as a marriage (chapter 26.60 RCW).<br><br>If you were not married at any time during the pregnancy, an acknowledgment of paternity needs to be completed to add the father to the birth certificate. |                                                                                                                                                                                                                                                                                                                                                                                                                                                                                                        |                                                                                                                                                                                                                                                                                                                                                                                                                                                                                                                                                                                                                                                                                                                                                                                                                                                                |
| <b>Married - Yes</b>                                                                                                                                                                                                                                                                                                                                                                                                                                                                                                                                                                                                                                                                                                                                                                               |                                                                                                                                                                                                                                                                                                                                                                                                                                                                                                        | <b>Married - No</b>                                                                                                                                                                                                                                                                                                                                                                                                                                                                                                                                                                                                                                                                                                                                                                                                                                            |
| 29a. <input type="checkbox"/> Yes, I am married to the other parent identified in box #30.                                                                                                                                                                                                                                                                                                                                                                                                                                                                                                                                                                                                                                                                                                         | 29d. <input type="checkbox"/> No, I am not married and I am providing information about the father in box #30.<br><br>Ask hospital staff for a Paternity Acknowledgment form (#DOH 422-032). If you were married any time during the pregnancy and your previous spouse is not the parent identified in box #30, the spouse's Denial of Paternity must also be completed.                                                                                                                              |                                                                                                                                                                                                                                                                                                                                                                                                                                                                                                                                                                                                                                                                                                                                                                                                                                                                |
| 29b. <input type="checkbox"/> Yes, I am married but not to the other person identified in box #30.<br><br>Ask hospital staff for a Paternity Acknowledgment form (# DOH 422-032). You must complete this form, including the spouse's Denial of Paternity.                                                                                                                                                                                                                                                                                                                                                                                                                                                                                                                                         | 29e. <input type="checkbox"/> No, I am not married now, but I was married to the other parent identified in box #30 at some time during this pregnancy.                                                                                                                                                                                                                                                                                                                                                |                                                                                                                                                                                                                                                                                                                                                                                                                                                                                                                                                                                                                                                                                                                                                                                                                                                                |
| 29c. <input type="checkbox"/> Yes, I am married but I refuse to provide the spouse or partner's information.<br><br>If this box is checked, the other parent will be listed on the birth certificate as "None Named".                                                                                                                                                                                                                                                                                                                                                                                                                                                                                                                                                                              | 29f. <input type="checkbox"/> No, I am not married and I refuse to provide the father's information.<br><br>If this box is checked, the other parent will be listed on the birth certificate as "None Named".                                                                                                                                                                                                                                                                                          |                                                                                                                                                                                                                                                                                                                                                                                                                                                                                                                                                                                                                                                                                                                                                                                                                                                                |
| <b>Father/ Parent's Information</b>                                                                                                                                                                                                                                                                                                                                                                                                                                                                                                                                                                                                                                                                                                                                                                |                                                                                                                                                                                                                                                                                                                                                                                                                                                                                                        |                                                                                                                                                                                                                                                                                                                                                                                                                                                                                                                                                                                                                                                                                                                                                                                                                                                                |
| *30. Current Legal Name<br>First _____ Middle _____ Last _____                                                                                                                                                                                                                                                                                                                                                                                                                                                                                                                                                                                                                                                                                                                                     |                                                                                                                                                                                                                                                                                                                                                                                                                                                                                                        |                                                                                                                                                                                                                                                                                                                                                                                                                                                                                                                                                                                                                                                                                                                                                                                                                                                                |
| *31. Date of Birth (MM/DD/YYYY)<br>____ / ____ / ____                                                                                                                                                                                                                                                                                                                                                                                                                                                                                                                                                                                                                                                                                                                                              | *32. Birthplace (State, Territory, or Foreign Country) _____                                                                                                                                                                                                                                                                                                                                                                                                                                           | 33. Social Security Number _____                                                                                                                                                                                                                                                                                                                                                                                                                                                                                                                                                                                                                                                                                                                                                                                                                               |
| 34. Occupation (type of work done during last year.) _____                                                                                                                                                                                                                                                                                                                                                                                                                                                                                                                                                                                                                                                                                                                                         |                                                                                                                                                                                                                                                                                                                                                                                                                                                                                                        | 35. Kind of Business/Industry (do not use Company Name) _____                                                                                                                                                                                                                                                                                                                                                                                                                                                                                                                                                                                                                                                                                                                                                                                                  |
| 36. Father/Parent Education<br>(Check the box that best describes the highest degree or level of school completed at the time of delivery.)<br><br>1 <input type="checkbox"/> 8 <sup>th</sup> grade or less (specify): _____<br>2 <input type="checkbox"/> 9 <sup>th</sup> - 12 <sup>th</sup> grade; no diploma<br>3 <input type="checkbox"/> High school graduate or GED<br>4 <input type="checkbox"/> Some college credit, but no degree<br>5 <input type="checkbox"/> Associate degree (AA, AS, etc.)<br>6 <input type="checkbox"/> Bachelor's degree (BA, AB, BS, etc.)<br>7 <input type="checkbox"/> Master's degree (MA, MS, MEd, MSW, MBA, etc.)<br>8 <input type="checkbox"/> Doctorate (PhD, EdD, etc.) or professional degree (MD, DDS, DVM, LLB, JD, etc.)                              | 37. Father/Parent of Hispanic Origin?<br>(Check the box that best describes whether the father/parent is Spanish/Hispanic/Latino or check "No" box if not Spanish/Hispanic/Latino.)<br><br>1 <input type="checkbox"/> No, not Spanish/Hispanic/Latino<br>2 <input type="checkbox"/> Yes, Mexican, Mexican American, Chicano<br>3 <input type="checkbox"/> Yes, Puerto Rican<br>4 <input type="checkbox"/> Yes, Cuban<br>5 <input type="checkbox"/> Yes, other Spanish/Hispanic/Latino (specify): _____ | 38. Father/Parent Race (check one or more)<br><br>1 <input type="checkbox"/> White<br>2 <input type="checkbox"/> Black or African American<br>3 <input type="checkbox"/> American Indian or Alaska Native<br>(Name of enrolled or principal tribe) _____<br>4 <input type="checkbox"/> Asian Indian      5 <input type="checkbox"/> Chinese<br>6 <input type="checkbox"/> Filipino            7 <input type="checkbox"/> Japanese<br>8 <input type="checkbox"/> Korean                9 <input type="checkbox"/> Vietnamese<br>10 <input type="checkbox"/> Other Asian (specify): _____<br>11 <input type="checkbox"/> Native Hawaiian    12 <input type="checkbox"/> Guamanian or Chamorro<br>13 <input type="checkbox"/> Samoan<br>14 <input type="checkbox"/> Other Pacific Islander (specify): _____<br>15 <input type="checkbox"/> Other (specify): _____ |

| For Hospital Use Only                                                                                                                                                                                                                                                                                                                                                                                                                                                                                                                                                                                                                                                                                                                                                                                                                                                                                                                                                                                                                                                                                                                                                                                                                                                                                          |                                                                                                                                                                                                                                                                                                                                                                                                                                                                                                                                                                                                                               |                                                                                                                                                                                                                                                                                                                                                                                                                                                                                                                                                                                                                                                                                                                                                                                                                                                                                                                                                                                  |
|----------------------------------------------------------------------------------------------------------------------------------------------------------------------------------------------------------------------------------------------------------------------------------------------------------------------------------------------------------------------------------------------------------------------------------------------------------------------------------------------------------------------------------------------------------------------------------------------------------------------------------------------------------------------------------------------------------------------------------------------------------------------------------------------------------------------------------------------------------------------------------------------------------------------------------------------------------------------------------------------------------------------------------------------------------------------------------------------------------------------------------------------------------------------------------------------------------------------------------------------------------------------------------------------------------------|-------------------------------------------------------------------------------------------------------------------------------------------------------------------------------------------------------------------------------------------------------------------------------------------------------------------------------------------------------------------------------------------------------------------------------------------------------------------------------------------------------------------------------------------------------------------------------------------------------------------------------|----------------------------------------------------------------------------------------------------------------------------------------------------------------------------------------------------------------------------------------------------------------------------------------------------------------------------------------------------------------------------------------------------------------------------------------------------------------------------------------------------------------------------------------------------------------------------------------------------------------------------------------------------------------------------------------------------------------------------------------------------------------------------------------------------------------------------------------------------------------------------------------------------------------------------------------------------------------------------------|
| Mother's Statistical Information                                                                                                                                                                                                                                                                                                                                                                                                                                                                                                                                                                                                                                                                                                                                                                                                                                                                                                                                                                                                                                                                                                                                                                                                                                                                               |                                                                                                                                                                                                                                                                                                                                                                                                                                                                                                                                                                                                                               |                                                                                                                                                                                                                                                                                                                                                                                                                                                                                                                                                                                                                                                                                                                                                                                                                                                                                                                                                                                  |
| 1 39. Date of <u>First</u> Prenatal Care Visit (MM/DD/YYYY)<br>/ / <input type="checkbox"/> No Prenatal Care                                                                                                                                                                                                                                                                                                                                                                                                                                                                                                                                                                                                                                                                                                                                                                                                                                                                                                                                                                                                                                                                                                                                                                                                   | 40. Date of <u>Last</u> Prenatal Care Visit (MM/DD/YYYY)<br>/ /                                                                                                                                                                                                                                                                                                                                                                                                                                                                                                                                                               | 41. Total Number of Prenatal Visits for this Pregnancy<br>(If none, enter '0')                                                                                                                                                                                                                                                                                                                                                                                                                                                                                                                                                                                                                                                                                                                                                                                                                                                                                                   |
| 2 42. Number of Previous Live Births (Do not include this child)<br>Number Now Living <input type="checkbox"/> None<br>Number Now Dead <input type="checkbox"/> None                                                                                                                                                                                                                                                                                                                                                                                                                                                                                                                                                                                                                                                                                                                                                                                                                                                                                                                                                                                                                                                                                                                                           | 43. Date of Last Live Birth (MM/YYYY) (Do not include this child)<br>/ /                                                                                                                                                                                                                                                                                                                                                                                                                                                                                                                                                      | 44. Number of Other Pregnancy Outcomes<br>(Spontaneous or induced losses or ectopic pregnancies)<br>Number of Other Outcomes <input type="checkbox"/> None                                                                                                                                                                                                                                                                                                                                                                                                                                                                                                                                                                                                                                                                                                                                                                                                                       |
| 4 45. Date of Last Other Pregnancy Outcome (MM/YYYY)<br>/ /                                                                                                                                                                                                                                                                                                                                                                                                                                                                                                                                                                                                                                                                                                                                                                                                                                                                                                                                                                                                                                                                                                                                                                                                                                                    | 46. Date Last Normal Menses Began (MM/DD/YYYY)<br>/ /                                                                                                                                                                                                                                                                                                                                                                                                                                                                                                                                                                         | 47. Mother's Weight at Delivery(pounds)                                                                                                                                                                                                                                                                                                                                                                                                                                                                                                                                                                                                                                                                                                                                                                                                                                                                                                                                          |
| 6 48. Was mother transferred to higher level care for maternal medical or fetal indications for delivery? <input type="checkbox"/> Yes <input type="checkbox"/> No<br>If yes, name of facility mother was transferred from:                                                                                                                                                                                                                                                                                                                                                                                                                                                                                                                                                                                                                                                                                                                                                                                                                                                                                                                                                                                                                                                                                    | 49. Principal Source of Payment for this Delivery<br><input type="checkbox"/> Medicaid <input type="checkbox"/> Self-Pay <input type="checkbox"/> Private Insurance<br><input type="checkbox"/> Other Gov't <input type="checkbox"/> Tricare <input type="checkbox"/> Indian Health<br><input type="checkbox"/> Charity Care <input type="checkbox"/> Other _____                                                                                                                                                                                                                                                             |                                                                                                                                                                                                                                                                                                                                                                                                                                                                                                                                                                                                                                                                                                                                                                                                                                                                                                                                                                                  |
| Child's Statistical Information                                                                                                                                                                                                                                                                                                                                                                                                                                                                                                                                                                                                                                                                                                                                                                                                                                                                                                                                                                                                                                                                                                                                                                                                                                                                                |                                                                                                                                                                                                                                                                                                                                                                                                                                                                                                                                                                                                                               |                                                                                                                                                                                                                                                                                                                                                                                                                                                                                                                                                                                                                                                                                                                                                                                                                                                                                                                                                                                  |
| 10 50. Birth Weight<br>lbs: ozs: or grams:                                                                                                                                                                                                                                                                                                                                                                                                                                                                                                                                                                                                                                                                                                                                                                                                                                                                                                                                                                                                                                                                                                                                                                                                                                                                     | 51. Infant Head Circumference (cm)                                                                                                                                                                                                                                                                                                                                                                                                                                                                                                                                                                                            | 52. Obstetric Estimate of Gestation (completed weeks)                                                                                                                                                                                                                                                                                                                                                                                                                                                                                                                                                                                                                                                                                                                                                                                                                                                                                                                            |
| 11 53. Apgar score at 5 minutes _____ If score is less than 6, score at 10 minutes _____                                                                                                                                                                                                                                                                                                                                                                                                                                                                                                                                                                                                                                                                                                                                                                                                                                                                                                                                                                                                                                                                                                                                                                                                                       |                                                                                                                                                                                                                                                                                                                                                                                                                                                                                                                                                                                                                               |                                                                                                                                                                                                                                                                                                                                                                                                                                                                                                                                                                                                                                                                                                                                                                                                                                                                                                                                                                                  |
| 12 54. Plurality: <input type="checkbox"/> Single <input type="checkbox"/> twins <input type="checkbox"/> triplets <input type="checkbox"/> other _____                                                                                                                                                                                                                                                                                                                                                                                                                                                                                                                                                                                                                                                                                                                                                                                                                                                                                                                                                                                                                                                                                                                                                        |                                                                                                                                                                                                                                                                                                                                                                                                                                                                                                                                                                                                                               | 55. If not single birth; birth order: <input type="checkbox"/> first <input type="checkbox"/> second <input type="checkbox"/> third <input type="checkbox"/> other _____                                                                                                                                                                                                                                                                                                                                                                                                                                                                                                                                                                                                                                                                                                                                                                                                         |
| 13 56. Was infant transferred within 24 hours of delivery? <input type="checkbox"/> Yes <input type="checkbox"/> No<br>If yes, name of facility infant was transferred to:                                                                                                                                                                                                                                                                                                                                                                                                                                                                                                                                                                                                                                                                                                                                                                                                                                                                                                                                                                                                                                                                                                                                     | 57. Is infant living at the time of report?<br><input type="checkbox"/> Yes <input type="checkbox"/> No <input type="checkbox"/> Transferred, status unknown                                                                                                                                                                                                                                                                                                                                                                                                                                                                  | 58. Is infant being breastfed?<br><input type="checkbox"/> Yes <input type="checkbox"/> No                                                                                                                                                                                                                                                                                                                                                                                                                                                                                                                                                                                                                                                                                                                                                                                                                                                                                       |
| Medical and Health Information                                                                                                                                                                                                                                                                                                                                                                                                                                                                                                                                                                                                                                                                                                                                                                                                                                                                                                                                                                                                                                                                                                                                                                                                                                                                                 |                                                                                                                                                                                                                                                                                                                                                                                                                                                                                                                                                                                                                               |                                                                                                                                                                                                                                                                                                                                                                                                                                                                                                                                                                                                                                                                                                                                                                                                                                                                                                                                                                                  |
| 15 59. Risk Factors in this Pregnancy (check all that apply):<br>1 Diabetes<br><input type="checkbox"/> Prepregnancy (Diagnosis prior to this pregnancy)<br><input type="checkbox"/> Gestational (Diagnosis in this pregnancy)<br>2 Hypertension<br><input type="checkbox"/> Prepregnancy (Chronic)<br><input type="checkbox"/> Gestational (PIH, preeclampsia)<br><input type="checkbox"/> Eclampsia<br>3 <input type="checkbox"/> Previous preterm births<br>4 <input type="checkbox"/> Other previous poor pregnancy outcome (includes perinatal death, small-for-gestational age/intrauterine growth restricted birth)<br>5 <input type="checkbox"/> Vaginal bleeding during this pregnancy prior to the onset of labor<br>6 <input type="checkbox"/> Pregnancy resulted from infertility treatment - If yes-check all that apply:<br><input type="checkbox"/> Fertility-enhancing drugs, artificial insemination or intrauterine insemination<br><input type="checkbox"/> Assisted reproductive technology [e.g., in vitro fertilization (IVF), gamete intrafallopian transfer (GIFT)]<br>7 <input type="checkbox"/> Mother had a previous cesarean delivery? If Yes, how many _____<br>8 <input type="checkbox"/> Group B Streptococcus culture positive<br>9 <input type="checkbox"/> None of the above | 60. Infections Present and/or Treated During this Pregnancy (check all that apply):<br>1 <input type="checkbox"/> Gonorrhea<br>2 <input type="checkbox"/> Syphilis<br>3 <input type="checkbox"/> Herpes Simplex Virus (HSV)<br>4 <input type="checkbox"/> Chlamydia<br>5 <input type="checkbox"/> Hepatitis B<br>6 <input type="checkbox"/> Hepatitis C<br>7 <input type="checkbox"/> HIV Infection<br>8 <input type="checkbox"/> Other _____<br>Specify: _____<br>9 <input type="checkbox"/> None of the above                                                                                                               | 61. Maternal Morbidity (complications associated with labor and delivery) (Check all that apply):<br>1 <input type="checkbox"/> Maternal transfusion<br>2 <input type="checkbox"/> Third or fourth degree perineal laceration<br>3 <input type="checkbox"/> Ruptured uterus<br>4 <input type="checkbox"/> Unplanned hysterectomy<br>5 <input type="checkbox"/> Admission to intensive care unit<br>6 <input type="checkbox"/> Unplanned operating room procedure following delivery<br>7 <input type="checkbox"/> None of the above                                                                                                                                                                                                                                                                                                                                                                                                                                              |
| 33 62. Method of Delivery<br>A. Was delivery with forceps attempted but unsuccessful?<br><input type="checkbox"/> Yes <input type="checkbox"/> No<br>B. Was delivery with vacuum extraction attempted but unsuccessful?<br><input type="checkbox"/> Yes <input type="checkbox"/> No<br>C. Fetal presentation at birth<br><input type="checkbox"/> Cephalic <input type="checkbox"/> Breech <input type="checkbox"/> Other<br>D. Final route and method of delivery (Check One)<br>Vaginal: <input type="checkbox"/> Spontaneous <input type="checkbox"/> Forceps <input type="checkbox"/> Vacuum<br>OR<br>Cesarean: <input type="checkbox"/><br>If cesarean, was a trial of labor attempted?<br><input type="checkbox"/> Yes <input type="checkbox"/> No                                                                                                                                                                                                                                                                                                                                                                                                                                                                                                                                                       | 63. Obstetric procedures (Check all that apply):<br>1 <input type="checkbox"/> Cervical cerclage<br>2 <input type="checkbox"/> Tocolysis<br>3 <input type="checkbox"/> External cephalic version:<br><input type="checkbox"/> Successful<br><input type="checkbox"/> Failed<br>4 <input type="checkbox"/> None of the above<br>64. Onset of Labor (Check all that apply):<br>1 <input type="checkbox"/> Premature rupture of the membranes (Prolonged, ≥ 12hr)<br>2 <input type="checkbox"/> Precipitous Labor (< 3hr)<br>3 <input type="checkbox"/> Prolonged Labor (≥ 20hr)<br>4 <input type="checkbox"/> None of the above | 65. Characteristics of Labor and Delivery (Check all that apply):<br>1 <input type="checkbox"/> Induction of labor<br>2 <input type="checkbox"/> Augmentation of labor<br>3 <input type="checkbox"/> Non-vertex presentation<br>4 <input type="checkbox"/> Epidural or spinal anesthesia during labor<br>5 <input type="checkbox"/> Steroids (glucocorticoids) for fetal lung maturation received by the mother prior to delivery<br>6 <input type="checkbox"/> Antibiotics received by the mother during labor<br>7 <input type="checkbox"/> Clinical chorioamnionitis diagnosed during labor or maternal temperature ≥38°C (100.4°F)<br>8 <input type="checkbox"/> Moderate/heavy meconium staining of the amniotic fluid<br>9 <input type="checkbox"/> Fetal intolerance of labor such that one or more of the following actions was taken: in-utero resuscitation measures, further fetal assessment, or operative delivery<br>10 <input type="checkbox"/> None of the above |
| 45 66. Abnormal Conditions of the Newborn (Occurring within 24 hours of delivery) (check all that apply):<br>1 <input type="checkbox"/> Assisted ventilation required immediately following delivery<br>2 <input type="checkbox"/> Assisted ventilation required for more than six hours<br>3 <input type="checkbox"/> NICU admission<br>4 <input type="checkbox"/> Newborn given surfactant replacement therapy<br>5 <input type="checkbox"/> Antibiotics received by the newborn for suspected neonatal sepsis<br>6 <input type="checkbox"/> Seizure or serious neurologic dysfunction<br>7 <input type="checkbox"/> Significant birth injury (skeletal fracture(s), peripheral nerve injury, soft tissue or solid organ hemorrhage which requires intervention)<br>8 <input type="checkbox"/> None of the above                                                                                                                                                                                                                                                                                                                                                                                                                                                                                             | 67. Congenital Anomalies of the Newborn (Observed within 24 hours of delivery) (Check all that apply):<br>1 <input type="checkbox"/> Anencephaly<br>2 <input type="checkbox"/> Meningocele / Spina bifida<br>3 <input type="checkbox"/> Cyanotic congenital heart disease<br>4 <input type="checkbox"/> Congenital diaphragmatic hernia<br>5 <input type="checkbox"/> Omphalocele<br>6 <input type="checkbox"/> Gastroschisis<br>7 <input type="checkbox"/> Limb reduction defect (excluding congenital amputation and dwarfing syndrome)                                                                                     | 8 <input type="checkbox"/> Cleft Lip with or without Cleft Palate<br>9 <input type="checkbox"/> Cleft Palate alone<br>10 Down Syndrome<br><input type="checkbox"/> Karyotype confirmed<br><input type="checkbox"/> Karyotype pending<br>11 Chromosomal disorder<br><input type="checkbox"/> Karyotype confirmed<br><input type="checkbox"/> Suspected, Karyotype pending<br>12 <input type="checkbox"/> Hypospadias<br>13 <input type="checkbox"/> None of the above                                                                                                                                                                                                                                                                                                                                                                                                                                                                                                             |
| Attendant and Certifier Information                                                                                                                                                                                                                                                                                                                                                                                                                                                                                                                                                                                                                                                                                                                                                                                                                                                                                                                                                                                                                                                                                                                                                                                                                                                                            |                                                                                                                                                                                                                                                                                                                                                                                                                                                                                                                                                                                                                               |                                                                                                                                                                                                                                                                                                                                                                                                                                                                                                                                                                                                                                                                                                                                                                                                                                                                                                                                                                                  |
| 68. Certifier – Name and Title                                                                                                                                                                                                                                                                                                                                                                                                                                                                                                                                                                                                                                                                                                                                                                                                                                                                                                                                                                                                                                                                                                                                                                                                                                                                                 |                                                                                                                                                                                                                                                                                                                                                                                                                                                                                                                                                                                                                               | 69. Date Certified (MM/DD/YYYY)<br>/ /                                                                                                                                                                                                                                                                                                                                                                                                                                                                                                                                                                                                                                                                                                                                                                                                                                                                                                                                           |
| 70. Attendant – Name and Title (If other than Certifier)                                                                                                                                                                                                                                                                                                                                                                                                                                                                                                                                                                                                                                                                                                                                                                                                                                                                                                                                                                                                                                                                                                                                                                                                                                                       |                                                                                                                                                                                                                                                                                                                                                                                                                                                                                                                                                                                                                               | 71. NPI of person delivering the baby:                                                                                                                                                                                                                                                                                                                                                                                                                                                                                                                                                                                                                                                                                                                                                                                                                                                                                                                                           |

**Appendix Table 1.** Severe neonatal morbidity components and ICD-9-CM codes.

| Neonatal morbidity                                                                                                                                                                                                                                                                                                                                                                                                                                                                                                                                    | ICD-9-CM code            |
|-------------------------------------------------------------------------------------------------------------------------------------------------------------------------------------------------------------------------------------------------------------------------------------------------------------------------------------------------------------------------------------------------------------------------------------------------------------------------------------------------------------------------------------------------------|--------------------------|
| <b>Bronchopulmonary dysplasia</b>                                                                                                                                                                                                                                                                                                                                                                                                                                                                                                                     | 770.7                    |
| <b>Intraventricular hemorrhage</b><br>Grade III – bleeding with enlargement of ventricle<br>Grade IV – bleeding into cerebral cortex                                                                                                                                                                                                                                                                                                                                                                                                                  | 772.13<br>772.14         |
| <b>Periventricular leukomalacia</b>                                                                                                                                                                                                                                                                                                                                                                                                                                                                                                                   | 779.7                    |
| <b>Retinopathy of prematurity</b>                                                                                                                                                                                                                                                                                                                                                                                                                                                                                                                     | 362.2                    |
| <b>Necrotizing enterocolitis</b>                                                                                                                                                                                                                                                                                                                                                                                                                                                                                                                      | 777.5                    |
| <b>Sepsis</b><br>Septicemia of newborn                                                                                                                                                                                                                                                                                                                                                                                                                                                                                                                | 771.81                   |
| <b>Convulsions</b><br>Fits in newborn; seizures in newborn                                                                                                                                                                                                                                                                                                                                                                                                                                                                                            | 779.0                    |
| <b>Severe birth trauma</b><br>Subdural and cerebral hemorrhage (whether described as due to birth trauma or to intrapartum anoxia or hypoxia; subdural hematoma (localized); tentorial tear<br>Epicranial subaponeurotic hemorrhage (massive); subgaleal hemorrhage<br>Injury to spine and spinal cord including:<br>Dislocation of spine or spinal cord due to birth trauma<br>Fracture of spine or spinal cord due to birth trauma<br>Laceration of spine or spinal cord due to birth trauma<br>Rupture of spine or spinal cord due to birth trauma | 767.0<br>767.11<br>767.4 |



Appendix Figure 1. Study population flow chart, Washington State, U.S.A., 2004-2013.

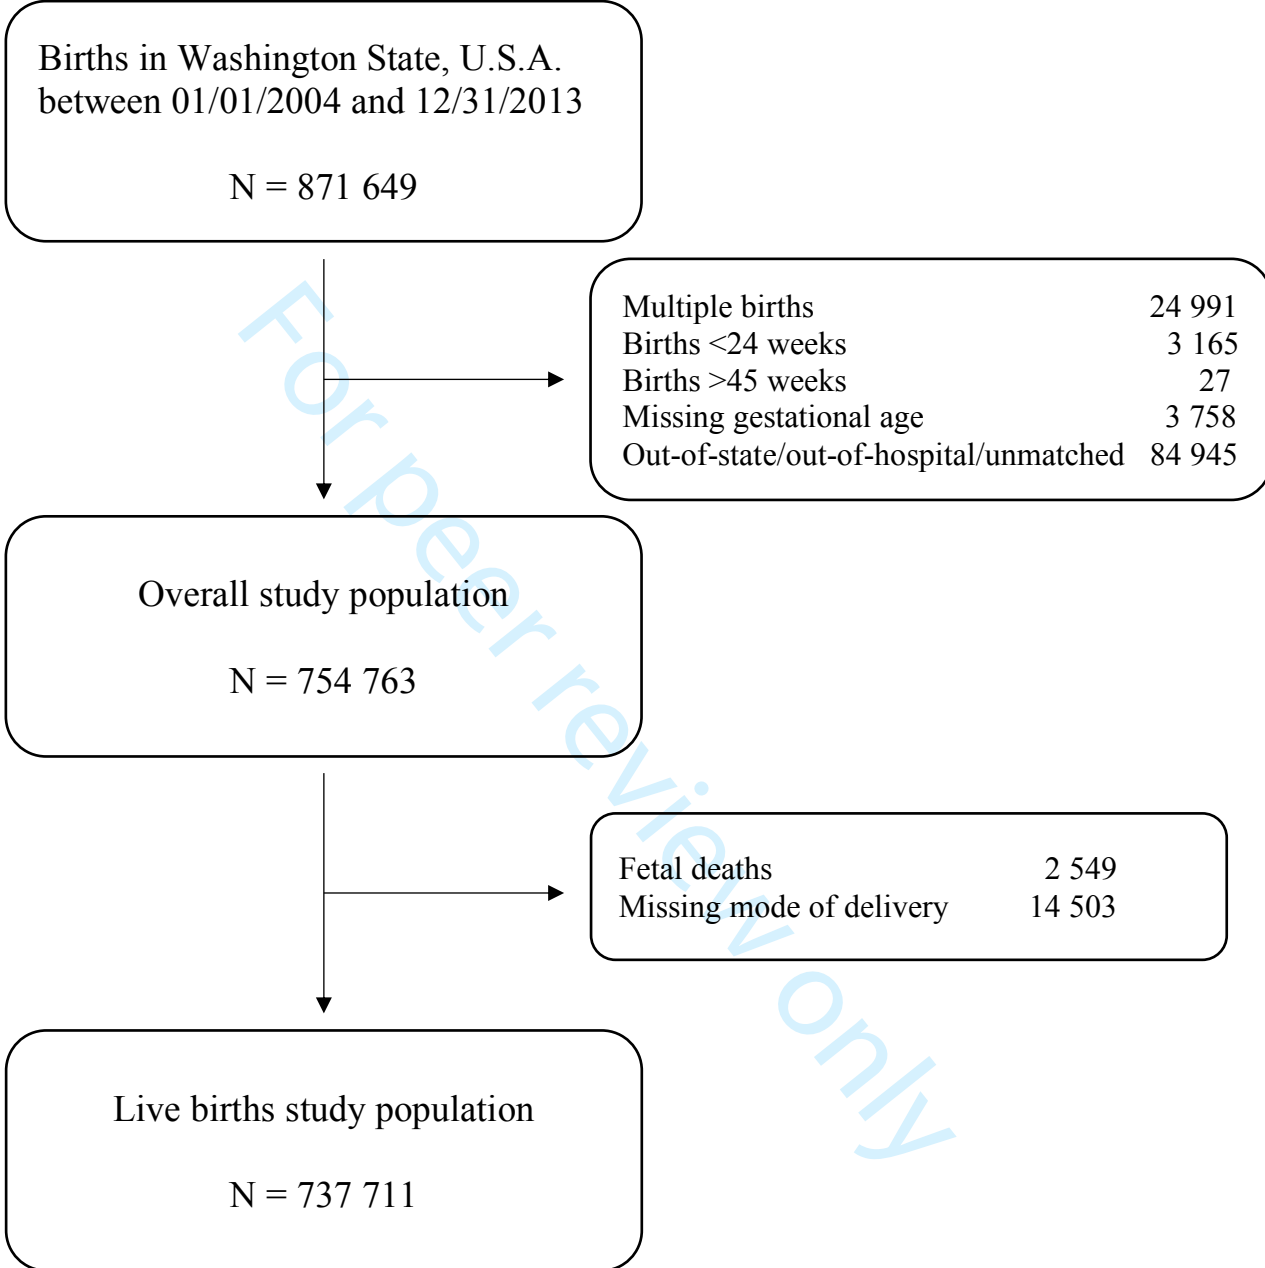

**Appendix Figure 2.** Gestational age-specific rates of stillbirths calculated using the fetuses-at-risk (FAR) approach, Washington State, U.S.A., 2004-2013.

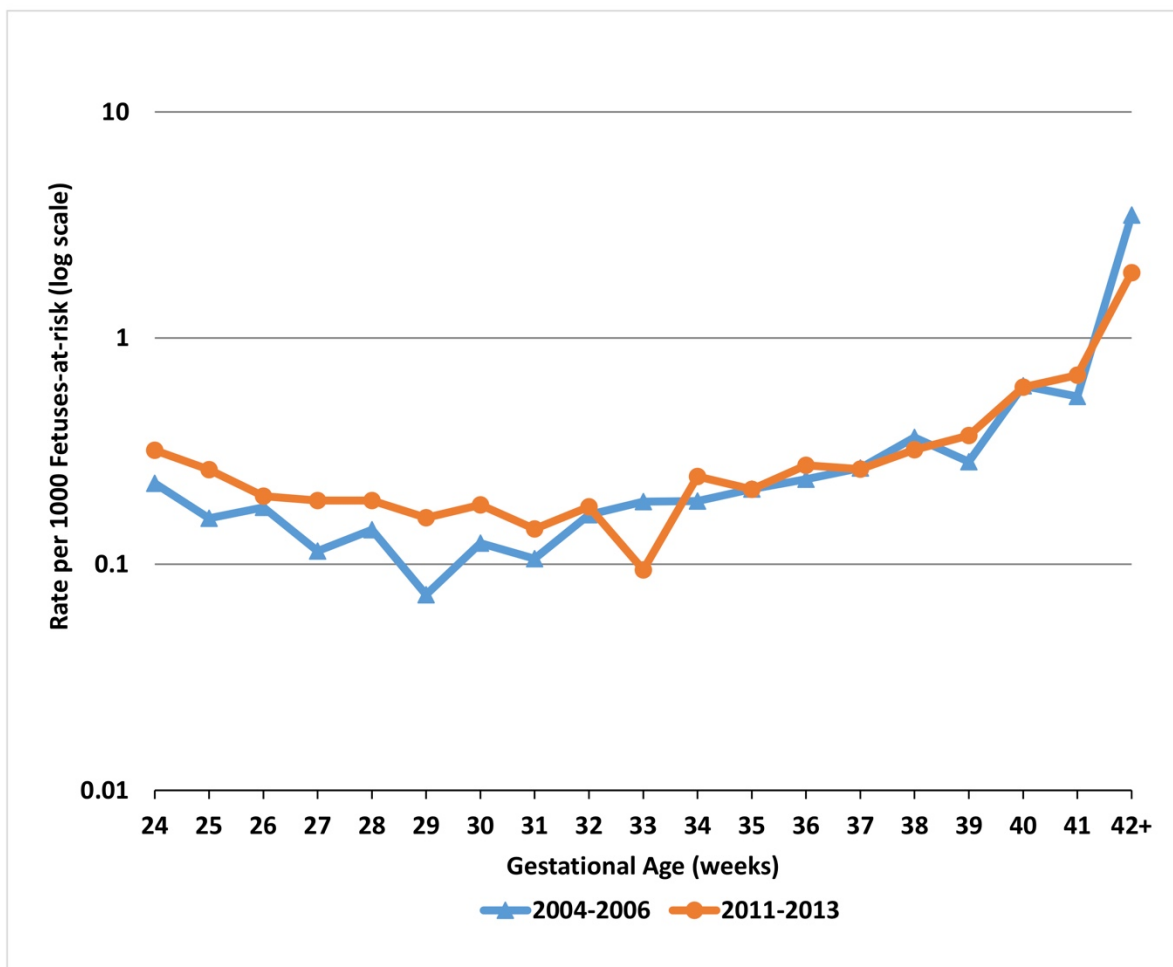

**Appendix Table 2.** Preterm live births by gestational age categories and clinical subtype, Washington State, U.S.A., 2004-2013.

| <b>Gestational age and clinical preterm birth subtype</b> | <b>All Years (2004-2013)</b> | <b>Period 1 (2004-2006)</b> | <b>Period 2 (2011-2013)</b> | <b>p-value* (Period 1 vs. Period 2)</b> |
|-----------------------------------------------------------|------------------------------|-----------------------------|-----------------------------|-----------------------------------------|
| 24-27 weeks                                               | 1 833                        | 489                         | 598                         | <0.001                                  |
| PPROM                                                     | 509 (27.8)                   | 181 (37.0)                  | 130 (21.7)                  |                                         |
| Spontaneous labor                                         | 532 (29.0)                   | 135 (27.6)                  | 189 (31.6)                  |                                         |
| Iatrogenic                                                | 792 (43.2)                   | 173 (35.4)                  | 279 (46.7)                  |                                         |
| 28-31                                                     | 4 095                        | 1 135                       | 1 357                       | <0.001                                  |
| PPROM                                                     | 909 (22.2)                   | 295 (26.0)                  | 264 (19.5)                  |                                         |
| Spontaneous labor                                         | 1 255 (30.6)                 | 357 (31.5)                  | 416 (30.7)                  |                                         |
| Iatrogenic                                                | 1 931 (47.2)                 | 483 (42.6)                  | 677 (49.9)                  |                                         |
| 32-33                                                     | 5 664                        | 1 469                       | 1 848                       | 0.006                                   |
| PPROM                                                     | 1 288 (22.7)                 | 383 (26.1)                  | 410 (22.2)                  |                                         |
| Spontaneous labor                                         | 1 988 (35.1)                 | 530 (36.1)                  | 649 (35.1)                  |                                         |
| Iatrogenic                                                | 2 388 (42.2)                 | 556 (37.8)                  | 789 (42.7)                  |                                         |
| 34-36                                                     | 40 422                       | 12 249                      | 11 821                      | 0.001                                   |
| PPROM                                                     | 5 809 (14.4)                 | 1 912 (15.6)                | 1 673 (14.2)                |                                         |
| Spontaneous labor                                         | 18 973 (46.9)                | 5 770 (47.1)                | 5 530 (46.8)                |                                         |
| Iatrogenic                                                | 15 640 (38.7)                | 4 567 (37.3)                | 4 618 (39.1)                |                                         |
| All (24-36)                                               | 52 014                       | 15 342                      | 15 624                      | <0.001                                  |
| PPROM                                                     | 8 515 (16.4)                 | 2 771 (18.1)                | 2 477 (15.9)                |                                         |
| Spontaneous labor                                         | 22 748 (43.7)                | 6 792 (44.3)                | 6 784 (43.4)                |                                         |
| Iatrogenic                                                | 20 751 (39.9)                | 5 779 (37.7)                | 6 363 (40.7)                |                                         |

PPROM, preterm premature rupture of membranes

\* p-value for Chi-square test comparing Period 1 and 2

**Appendix Table 3** Gestational age-specific rates of adverse neonatal outcomes among singleton preterm infants, Washington State, U.S.A., 2004-2013.

| Outcome and gestational age category | Rates per 100 live births |              |                          |
|--------------------------------------|---------------------------|--------------|--------------------------|
|                                      | N (Rate)                  |              | Rate difference (95% CI) |
|                                      | 2004-2006                 | 2011-2013    |                          |
| Neonatal death                       |                           |              |                          |
| 24-27 weeks                          | 76 (15.5)                 | 85 (14.2)    | -1.33 (-5.59, 2.93)      |
| 28-31                                | 55 (4.9)                  | 40 (3.0)     | -1.90 (-3.44, -0.36)     |
| 32-33                                | 23 (1.6)                  | 18 (1.0)     | -0.59 (-1.37, 0.19)      |
| 34-36                                | 43 (0.4)                  | 64 (0.5)     | +0.19 (0.02, 0.36)       |
| All (24-36)                          | 197 (1.3)                 | 207 (1.3)    | +0.04 (-0.21, 0.29)      |
| Neonatal death/<br>severe morbidity  |                           |              |                          |
| 24-27 weeks                          | 353 (72.2)                | 429 (71.7)   | -0.45 (-5.82, 4.92)      |
| 28-31                                | 383 (33.7)                | 496 (36.6)   | +2.81 (-0.95, 6.57)      |
| 32-33                                | 166 (11.3)                | 302 (16.3)   | +5.04 (2.70, 7.38)       |
| 34-36                                | 307 (2.5)                 | 639 (5.4)    | +2.90 (2.41, 3.39)       |
| All (24-36)                          | 1 209 (7.9)               | 1 866 (11.9) | +4.06 (3.40, 4.73)       |

CI, confidence interval; severe morbidity includes BPD, IVH grade $\geq$ 3, PVL, ROP, NEC, neonatal sepsis, convulsions of newborn, and severe birth trauma.

1  
2  
3  
4  
5  
6  
7  
8  
9  
10  
11  
12  
13  
14  
15  
16  
17  
18  
19  
20  
21  
22  
23  
24  
25  
26  
27  
28  
29  
30  
31  
32  
33  
34  
35  
36  
37  
38  
39  
40  
41  
42  
43  
44  
45  
46  
47  
48  
49  
50  
51  
52  
53  
54  
55  
56  
57  
58  
59  
60

**Appendix Table 4.** Temporal trends in gestational-specific rates of severe neonatal morbidity components, Washington State, U.S.A., 2004-2013.

For peer review only

| Neonatal Morbidity            | Rates of Outcome by Period<br>[N (per 100 live births)] |             | Adjusted Odds<br>Ratio†<br>(95% CI) |
|-------------------------------|---------------------------------------------------------|-------------|-------------------------------------|
|                               | 2004-2006                                               | 2011-2013   |                                     |
| <b>All PTB (24-36 weeks)</b>  |                                                         |             |                                     |
| BPD                           | 306 (2.0)                                               | 269 (1.7)   | <b>0.95 (0.93-0.98)</b>             |
| IVH (grade $\geq 3$ )         | 72 (0.5)                                                | 61 (0.4)    | <b>0.95 (0.90-1.00)</b>             |
| PVL                           | 13 (0.1)                                                | 27 (0.2)    | 1.10 (1.00-1.22)                    |
| ROP                           | 60 (0.4)                                                | 86 (0.6)    | 1.02 (0.98-1.07)                    |
| NEC                           | 129 (0.8)                                               | 173 (1.1)   | 1.02 (0.99-1.06)                    |
| Sepsis                        | 686 (4.5)                                               | 1 331 (8.5) | <b>1.09 (1.08-1.11)</b>             |
| Convulsions                   | 53 (0.4)                                                | 62 (0.4)    | 1.00 (0.94-1.04)                    |
| Severe birth trauma           | 29 (0.2)                                                | 26 (0.2)    | 0.96 (0.89-1.04)                    |
| <b>Late PTB (34-36 weeks)</b> |                                                         |             |                                     |
| BPD                           | 6 (0.1)                                                 | 4 (0.0)     | 0.96 (0.81-1.12)                    |
| IVH (grade $\geq 3$ )         | 3 (0.0)                                                 | 3 (0.0)     | 0.97 (0.78-1.21)                    |
| PVL                           | 0 (0.0)                                                 | 0 (0.0)     | 1.05 (0.64-1.72)                    |
| ROP                           | 0 (0.0)                                                 | 2 (0.0)     | 1.56 (0.85-2.87)                    |
| NEC                           | 16 (0.1)                                                | 21 (0.2)    | 1.04 (0.95-1.14)                    |
| Sepsis                        | 211 (1.7)                                               | 530 (4.5)   | <b>1.12 (1.10-1.14)</b>             |
| Convulsions                   | 26 (0.2)                                                | 28 (0.2)    | 1.01 (0.93-1.09)                    |
| Severe birth trauma           | 16 (0.1)                                                | 14 (0.1)    | 0.97 (0.87-1.08)                    |
| <b>PTB at 28-33 weeks</b>     |                                                         |             |                                     |
| BPD                           | 121 (4.7)                                               | 95 (3.0)    | <b>0.93 (0.89-0.97)</b>             |
| IVH (grade $\geq 3$ )         | 24 (0.9)                                                | 19 (0.6)    | 0.92 (0.84-1.01)                    |
| PVL                           | 8 (0.3)                                                 | 15 (0.5)    | 1.06 (0.93-1.21)                    |
| ROP                           | 35 (1.3)                                                | 63 (2.0)    | 1.05 (0.99-1.11)                    |
| NEC                           | 76 (2.9)                                                | 89 (2.8)    | 1.00 (0.95-1.05)                    |
| Sepsis                        | 306 (11.8)                                              | 554 (17.3)  | <b>1.07 (1.05-1.10)</b>             |
| Convulsions                   | 19 (0.7)                                                | 20 (0.6)    | 0.96 (0.87-1.05)                    |
| Severe birth trauma           | 9 (0.4)                                                 | 9 (0.3)     | 0.95 (0.82-1.11)                    |
| <b>PTB at 24-27 weeks</b>     |                                                         |             |                                     |

|                       |            |            |                         |
|-----------------------|------------|------------|-------------------------|
| BPD                   | 179 (36.6) | 170 (28.4) | 0.97 (0.94-1.01)        |
| IVH (grade $\geq 3$ ) | 45 (9.2)   | 39 (6.5)   | 0.95 (0.88-1.01)        |
| PVL                   | 5 (1.0)    | 12 (2.0)   | 1.13 (0.96-1.32)        |
| ROP                   | 25 (5.1)   | 21 (3.5)   | 0.95 (0.87-1.02)        |
| NEC                   | 37 (7.6)   | 63 (10.5)  | 1.04 (0.98-1.10)        |
| Sepsis                | 169 (34.6) | 247 (41.3) | <b>1.05 (1.01-1.09)</b> |
| Convulsions           | 8 (1.6)    | 14 (2.3)   | 1.02 (0.91-1.14)        |
| Severe birth trauma   | 4 (0.8)    | 3 (0.5)    | 0.94 (0.76-1.15)        |

CI, confidence interval; PTB, preterm birth; BPD, bronchopulmonary dysplasia; IVH, intraventricular hemorrhage; PVL, periventricular leukomalacia; ROP, retinopathy of prematurity; NEC, necrotizing enterocolitis.

Adjusted odds ratios express the average annual change in the odds for each morbidity.

Bolded value indicates statistical significance at  $p < 0.05$

†Calendar year was modelled as a continuous variable; adjusted for temporal changes in maternal age, BMI, race, education, smoking, marital status, parity, chronic hypertension, pre-pregnancy diabetes, assisted conception, health insurance provider, gestational age, SGA infant, sex, and congenital anomalies. NOTE: some covariates were excluded from the regression models due to collinearity.

## STROBE Statement—checklist of items that should be included in reports of observational studies

|                              | Item No | Recommendation                                                                                                                                                                                                                                                                                                                                                                                                                                                                                                                                                                                                                                                                                                                                                                                    |
|------------------------------|---------|---------------------------------------------------------------------------------------------------------------------------------------------------------------------------------------------------------------------------------------------------------------------------------------------------------------------------------------------------------------------------------------------------------------------------------------------------------------------------------------------------------------------------------------------------------------------------------------------------------------------------------------------------------------------------------------------------------------------------------------------------------------------------------------------------|
| <b>Title and abstract</b>    | 1       | Indicate the study's design with a commonly used term in the title or the abstract<br><b>This was done, title page; "a population-based study"</b><br>(b) Provide in the abstract an informative and balanced summary of what was done and what was found<br><b>This was done, abstract, page 2; "We described concomitant changes in..."</b>                                                                                                                                                                                                                                                                                                                                                                                                                                                     |
| <b>Introduction</b>          |         |                                                                                                                                                                                                                                                                                                                                                                                                                                                                                                                                                                                                                                                                                                                                                                                                   |
| Background/rationale         | 2       | Explain the scientific background and rationale for the investigation being reported<br><b>This was done, page 4-5; "However, it is unknown whether the temporal decline in preterm birth is associated with..."</b>                                                                                                                                                                                                                                                                                                                                                                                                                                                                                                                                                                              |
| Objectives                   | 3       | State specific objectives, including any prespecified hypotheses<br><b>This was done, page 5; "Our aim was to describe temporal trends in ..."</b>                                                                                                                                                                                                                                                                                                                                                                                                                                                                                                                                                                                                                                                |
| <b>Methods</b>               |         |                                                                                                                                                                                                                                                                                                                                                                                                                                                                                                                                                                                                                                                                                                                                                                                                   |
| Study design                 | 4       | Present key elements of study design early in the paper<br><b>This was done, page 5; "We carried out a population-based study including..."</b>                                                                                                                                                                                                                                                                                                                                                                                                                                                                                                                                                                                                                                                   |
| Setting                      | 5       | Describe the setting, locations, and relevant dates, including periods of recruitment, exposure, follow-up, and data collection<br><b>This was done, page 5; "... all singleton hospital births to mothers aged 15 to 60 in Washington State, U.S.A., between January 1, 2004, and..."</b>                                                                                                                                                                                                                                                                                                                                                                                                                                                                                                        |
| Participants                 | 6       | (a) <i>Cohort study</i> —Give the eligibility criteria, and the sources and methods of selection of participants. Describe methods of follow-up<br><i>Case-control study</i> —Give the eligibility criteria, and the sources and methods of case ascertainment and control selection. Give the rationale for the choice of cases and controls<br><i>Cross-sectional study</i> —Give the eligibility criteria, and the sources and methods of selection of participants<br><b>This was done, page 5-6; "We used information from two linked population databases..."</b><br>(b) <i>Cohort study</i> —For matched studies, give matching criteria and number of exposed and unexposed<br><i>Case-control study</i> —For matched studies, give matching criteria and the number of controls per case |
| Variables                    | 7       | Clearly define all outcomes, exposures, predictors, potential confounders, and effect modifiers. Give diagnostic criteria, if applicable<br><b>This was done, page 6-7; "The primary outcomes were neonatal mortality and a composite adverse outcome including..."</b>                                                                                                                                                                                                                                                                                                                                                                                                                                                                                                                           |
| Data sources/<br>measurement | 8*      | For each variable of interest, give sources of data and details of methods of assessment (measurement). Describe comparability of assessment methods if there is more than one group<br><b>This was done, page 5-6; "...diagnosis and procedure codes related to each hospitalization episode coded by the International Classification of..."</b>                                                                                                                                                                                                                                                                                                                                                                                                                                                |
| Bias                         | 9       | Describe any efforts to address potential sources of bias<br><b>This was done, page 6-7; inclusion/exclusion criteria, consistent use of case ascertainment by ICD-9-CM codes from administrative data to avoid recall bias</b>                                                                                                                                                                                                                                                                                                                                                                                                                                                                                                                                                                   |



**or diagnostic bias**

---

|                        |    |                                                                                                                                                                                                                                                                                                                      |
|------------------------|----|----------------------------------------------------------------------------------------------------------------------------------------------------------------------------------------------------------------------------------------------------------------------------------------------------------------------|
| Study size             | 10 | Explain how the study size was arrived at<br><b>This was done, page 5; population-based; "... all singleton hospital births to mothers aged 15 to 60 in Washington State, U.S.A., between January 1, 2004, and..."</b>                                                                                               |
| Quantitative variables | 11 | Explain how quantitative variables were handled in the analyses. If applicable, describe which groupings were chosen and why<br><b>This was done, page 8-9; "The preterm birth rate was calculated as a proportion of live births..."</b>                                                                            |
| Statistical methods    | 12 | (a) Describe all statistical methods, including those used to control for confounding<br><b>This was done, page 8; "Logistic regression was used to assess temporal trends...adjusted for temporal changes in risk factors..."</b>                                                                                   |
|                        |    | (b) Describe any methods used to examine subgroups and interactions<br><b>This was done, page 8-9; "Temporal trends in the individual components of the composite outcome were examined... using logistic regression models..."</b>                                                                                  |
|                        |    | (c) Explain how missing data were addressed <b>This was done; page 9; "Missing values for BMI... were imputed using multiple imputation... other missing values were &lt;3% of the total, and the complete case multivariable analysis included 93% of preterm births..."</b>                                        |
|                        |    | (d) <i>Cohort study</i> —If applicable, explain how loss to follow-up was addressed<br><i>Case-control study</i> —If applicable, explain how matching of cases and controls was addressed<br><i>Cross-sectional study</i> —If applicable, describe analytical methods taking account of sampling strategy <b>n/a</b> |
|                        |    | (e) Describe any sensitivity analyses <b>not included</b>                                                                                                                                                                                                                                                            |

Continued on next page

**Results**

|                          |     |                                                                                                                                                                                                                                                                                                                                                                                                                                                                                                                                                                                                                                                                     |
|--------------------------|-----|---------------------------------------------------------------------------------------------------------------------------------------------------------------------------------------------------------------------------------------------------------------------------------------------------------------------------------------------------------------------------------------------------------------------------------------------------------------------------------------------------------------------------------------------------------------------------------------------------------------------------------------------------------------------|
| Participants             | 13* | (a) Report numbers of individuals at each stage of study—eg numbers potentially eligible, examined for eligibility, confirmed eligible, included in the study, completing follow-up, and analysed<br><b>This was done, page 10; “Overall, 871 649 singleton births occurred...the study population included 754 763 singleton infants born in hospital...”</b><br>(b) Give reasons for non-participation at each stage <b>This was done, page 10; “We excluded births at &lt;24 or &gt;45 weeks’ gestation, multiple births, births that occurred outside of Washington State...”</b><br>(c) Consider use of a flow diagram <b>This was done, Appendix Figure 2</b> |
| Descriptive data         | 14* | (a) Give characteristics of study participants (eg demographic, clinical, social) and information on exposures and potential confounders <b>This was done, Table 1</b><br>(b) Indicate number of participants with missing data for each variable of interest <b>This was done, Table 1</b><br>(c) <i>Cohort study</i> —Summarise follow-up time (eg, average and total amount)                                                                                                                                                                                                                                                                                     |
| Outcome data             | 15* | <i>Cohort study</i> —Report numbers of outcome events or summary measures over time<br><i>Case-control study</i> —Report numbers in each exposure category, or summary measures of exposure<br><i>Cross-sectional study</i> —Report numbers of outcome events or summary measures <b>This was done; Table 2, Table 3, Table 4, Figure 1, Figure 2</b>                                                                                                                                                                                                                                                                                                               |
| Main results             | 16  | (a) Give unadjusted estimates and, if applicable, confounder-adjusted estimates and their precision (eg, 95% confidence interval). Make clear which confounders were adjusted for and why they were included <b>This was done; Table 2, Table 3, Table 4</b><br>(b) Report category boundaries when continuous variables were categorized <b>This was done, Table 1</b><br>(c) If relevant, consider translating estimates of relative risk into absolute risk for a meaningful time period                                                                                                                                                                         |
| Other analyses           | 17  | Report other analyses done—eg analyses of subgroups and interactions, and sensitivity analyses <b>This was done, page 16, Appendix Table 4</b>                                                                                                                                                                                                                                                                                                                                                                                                                                                                                                                      |
| <b>Discussion</b>        |     |                                                                                                                                                                                                                                                                                                                                                                                                                                                                                                                                                                                                                                                                     |
| Key results              | 18  | Summarise key results with reference to study objectives <b>This was done, page 17; “Our findings show a decline in the preterm birth rate...”</b>                                                                                                                                                                                                                                                                                                                                                                                                                                                                                                                  |
| Limitations              | 19  | Discuss limitations of the study, taking into account sources of potential bias or imprecision. Discuss both direction and magnitude of any potential bias <b>This was done, page 20; “This study has a few limitations. First, clinical details on the severity of some...”</b>                                                                                                                                                                                                                                                                                                                                                                                    |
| Interpretation           | 20  | Give a cautious overall interpretation of results considering objectives, limitations, multiplicity of analyses, results from similar studies, and other relevant evidence <b>This was done, page 22; “The small decline in the preterm birth rate...was predominately due to...”</b>                                                                                                                                                                                                                                                                                                                                                                               |
| Generalisability         | 21  | Discuss the generalisability (external validity) of the study results <b>This was done, page 21; “We adjusted for a number of these indices thus our results are fairly generalizable to other states...or high-income countries...”</b>                                                                                                                                                                                                                                                                                                                                                                                                                            |
| <b>Other information</b> |     |                                                                                                                                                                                                                                                                                                                                                                                                                                                                                                                                                                                                                                                                     |
| Funding                  | 22  | Give the source of funding and the role of the funders for the present study and, if applicable, for the original study on which the present article is based <b>This was done, title page; “This work was supported by...”</b>                                                                                                                                                                                                                                                                                                                                                                                                                                     |

1  
2 \*Give information separately for cases and controls in case-control studies and, if applicable, for exposed and  
3 unexposed groups in cohort and cross-sectional studies.  
4

5 **Note:** An Explanation and Elaboration article discusses each checklist item and gives methodological background and  
6 published examples of transparent reporting. The STROBE checklist is best used in conjunction with this article (freely  
7 available on the Web sites of PLoS Medicine at <http://www.plosmedicine.org/>, Annals of Internal Medicine at  
8 <http://www.annals.org/>, and Epidemiology at <http://www.epidem.com/>). Information on the STROBE Initiative is  
9 available at [www.strobe-statement.org](http://www.strobe-statement.org).  
10  
11  
12  
13  
14  
15  
16  
17  
18  
19  
20  
21  
22  
23  
24  
25  
26  
27  
28  
29  
30  
31  
32  
33  
34  
35  
36  
37  
38  
39  
40  
41  
42  
43  
44  
45  
46  
47  
48  
49  
50  
51  
52  
53  
54  
55  
56  
57  
58  
59  
60

# BMJ Open

## Temporal trends in neonatal mortality and morbidity following spontaneous and clinician-initiated preterm birth in Washington State, U.S.A.: a population-based study

|                                 |                                                                                                                                                                                                                                                                                                                                                                                                                                                                                                                                                                                                                                                                                                                                                                                                                                                                                                                                                                                                                                                                                                                                                                                                                                                                                                                 |
|---------------------------------|-----------------------------------------------------------------------------------------------------------------------------------------------------------------------------------------------------------------------------------------------------------------------------------------------------------------------------------------------------------------------------------------------------------------------------------------------------------------------------------------------------------------------------------------------------------------------------------------------------------------------------------------------------------------------------------------------------------------------------------------------------------------------------------------------------------------------------------------------------------------------------------------------------------------------------------------------------------------------------------------------------------------------------------------------------------------------------------------------------------------------------------------------------------------------------------------------------------------------------------------------------------------------------------------------------------------|
| Journal:                        | <i>BMJ Open</i>                                                                                                                                                                                                                                                                                                                                                                                                                                                                                                                                                                                                                                                                                                                                                                                                                                                                                                                                                                                                                                                                                                                                                                                                                                                                                                 |
| Manuscript ID                   | bmjopen-2018-023004.R2                                                                                                                                                                                                                                                                                                                                                                                                                                                                                                                                                                                                                                                                                                                                                                                                                                                                                                                                                                                                                                                                                                                                                                                                                                                                                          |
| Article Type:                   | Research                                                                                                                                                                                                                                                                                                                                                                                                                                                                                                                                                                                                                                                                                                                                                                                                                                                                                                                                                                                                                                                                                                                                                                                                                                                                                                        |
| Date Submitted by the Author:   | 04-Dec-2018                                                                                                                                                                                                                                                                                                                                                                                                                                                                                                                                                                                                                                                                                                                                                                                                                                                                                                                                                                                                                                                                                                                                                                                                                                                                                                     |
| Complete List of Authors:       | Richter, Lindsay; Department of Obstetrics and Gynaecology, University of British Columbia and the Children's and Women's Hospital and Health Centre of British Columbia, Vancouver, BC, Canada, Obstetrics and Gynaecology<br>Ting, Joseph; Department of Pediatrics, University of British Columbia and the Children's and Women's Hospital and Health Centre of British Columbia, Vancouver, BC, Canada, Pediatrics<br>Muraca, Giulia; Department of Obstetrics and Gynaecology, University of British Columbia and the Children's and Women's Hospital and Health Centre of British Columbia, Vancouver, BC, Canada, Obstetrics and Gynaecology; University of British Columbia School of Population and Public Health<br>Synnes, Anne; Department of Pediatrics, University of British Columbia and the Children's and Women's Hospital and Health Centre of British Columbia, Vancouver, BC, Canada, Pediatrics<br>Lim, Kenneth; Department of Obstetrics and Gynaecology, University of British Columbia and the Children's and Women's Hospital and Health Centre of British Columbia, Vancouver, BC, Canada, Obstetrics and Gynaecology<br>Lisonkova, Sarka; University of British Columbia, Canada, Obstetrics and Gynaecology; University of British Columbia School of Population and Public Health |
| <b>Primary Subject Heading</b>: | Epidemiology                                                                                                                                                                                                                                                                                                                                                                                                                                                                                                                                                                                                                                                                                                                                                                                                                                                                                                                                                                                                                                                                                                                                                                                                                                                                                                    |
| Secondary Subject Heading:      | Obstetrics and gynaecology, Epidemiology, Paediatrics                                                                                                                                                                                                                                                                                                                                                                                                                                                                                                                                                                                                                                                                                                                                                                                                                                                                                                                                                                                                                                                                                                                                                                                                                                                           |
| Keywords:                       | Preterm Birth, Neonatal Mortality, Neonatal Morbidity, Trend, United States                                                                                                                                                                                                                                                                                                                                                                                                                                                                                                                                                                                                                                                                                                                                                                                                                                                                                                                                                                                                                                                                                                                                                                                                                                     |
|                                 |                                                                                                                                                                                                                                                                                                                                                                                                                                                                                                                                                                                                                                                                                                                                                                                                                                                                                                                                                                                                                                                                                                                                                                                                                                                                                                                 |

SCHOLARONE™  
Manuscripts

1  
2  
3 **Temporal trends in neonatal mortality and morbidity following spontaneous and clinician-**  
4  
5 **initiated preterm birth in Washington State, U.S.A.: a population-based study**  
6

7  
8 Lindsay Richter MSc,<sup>1</sup> Joseph Ting MBBS MPH,<sup>2</sup> Giulia M Muraca MPH PhD,<sup>1,3</sup> Anne Synnes  
9 MDCM MHSc,<sup>2</sup> Kenneth I Lim MD,<sup>1</sup> Sarka Lisonkova MD PhD<sup>1,3</sup>  
10

11 <sup>1</sup> Department of Obstetrics and Gynaecology, University of British Columbia and the Children's  
12 and Women's Hospital and Health Centre of British Columbia, Vancouver, BC, Canada.

13 <sup>2</sup> Department of Pediatrics, University of British Columbia and Women's Hospital and Health  
14 Centre of British Columbia, Vancouver, BC, Canada.

15 <sup>3</sup> School of Population and Public Health, University of British Columbia, Vancouver, BC,  
16 Canada.  
17  
18

19  
20 Corresponding author:

21 Dr. Sarka Lisonkova

22 Department of Obstetrics & Gynaecology

23 Women's Hospital and Health Centre of British Columbia

24 Room C403, 4480 Oak Street, Vancouver, BC, Canada, V6H 3V4

25 Email: slisonkova@cfri.ca Tel: 604-875-2345 x 4793 Fax: 604-875-2987  
26  
27  
28  
29

30 **Word count:** Abstract 300; Text 4178.

31 **Funding statement:** This work was funded by the Canadian Institutes of Health Research (F17-  
32 02161), University of British Columbia Department of Obstetrics and Gynaecology, and the BC  
33 Women's Health Research Institute.

34 **Competing interests statement:** None declared.

35 **Authors' contribution statement:** SL and LR designed the study, LR and SL performed data  
36 analysis, and LR and SL wrote the first draft of the manuscript. GM, JT, AS and KL contributed  
37 to the interpretation of the results and critically revised the first draft. LR, SL, GM, JT, AS and  
38 KL approved the final version of the manuscript.

39 **Ethics approval:** All analyses were performed on publicly accessible de-identified data. An  
40 exemption from ethics approval was granted by the Department of Social and Health Services,  
41 State of Washington.  
42

43 **Data sharing statement:** Analyses were based on administrative data collected and maintained  
44 by the Department of Health, State of Washington. The availability of the data is restricted.  
45 Permission for data access can be granted after verification of the research goals by the Department  
46 of Social and Health Services, State of Washington.  
47

48 **Acknowledgements:** SL is supported by a Michael Smith Foundation for Health Research  
49 Scholar Award. JT is supported by the Investigator Grant Award Program from British Columbia  
50 Children's Hospital Research Institute. GMM is supported by a Vanier Canada Graduate  
51 Scholarship.  
52

53 **Abbreviations:** PPRM preterm premature rupture of membranes, AOR adjusted odds ratio, CI  
54 confidence interval.

55 **Key words:** Preterm Birth, Neonatal Mortality, Neonatal Morbidity, Trend, United States  
56  
57

## ABSTRACT

**Objective:** After a decade of increase, the preterm birth (PTB) rate has declined in the United States since 2006, with the largest decline at late preterm (34-36 weeks). We described concomitant changes in gestational age-specific rates of neonatal mortality and morbidity following spontaneous and clinician-initiated PTB among singleton infants.

**Design, Setting, and Participants:** This retrospective population-based study included 754,763 singleton births in Washington State, U.S.A., 2004-2013, using data from birth certificates and hospitalization records. PTB subtypes included preterm premature rupture of membranes (PPROM), spontaneous onset of labor, and clinician-initiated delivery.

**Outcome Measures:** The primary outcomes were neonatal mortality and a composite outcome including death or severe neonatal morbidity. Temporal trends in the outcomes and individual morbidities were assessed by PTB subtype. Logistic regression yielded adjusted odds ratios (AOR) per 1-year change in outcome and 95% confidence intervals (CI).

**Results:** The rate of PTB following PPRM and spontaneous labor declined, while clinician-initiated PTB increased (all p-values<0.01). Overall neonatal mortality remained unchanged (1.3%; AOR 0.99, CI 0.95-1.02), though gestational age-specific mortality following clinician-initiated PTB declined at 32-33 weeks (AOR 0.85, CI 0.74-0.97), and increased at 34-36 weeks (AOR 1.10, CI 1.01-1.20). The overall rate of the composite outcome increased (from 7.9% to 11.9%; AOR 1.06, CI 1.05-1.08). Among late preterm infants, combined mortality or severe morbidity increased following PPRM (AOR 1.13, CI 1.08-1.18), spontaneous labor (AOR 1.09, CI 1.06-1.13), and clinician-initiated delivery (AOR 1.10, CI 1.07-1.13). Neonatal sepsis rates increased among all preterm infants (AOR 1.09, CI 1.08-1.11).

**Conclusions:** Timing of obstetric interventions is associated with infant health outcomes at preterm. The temporal decline in late PTB among singleton infants was associated with increased mortality among late preterm infants born following clinician-initiated delivery and increased combined mortality or severe morbidity among all late preterm infants, mainly due to increased rate of sepsis.

## STRENGTHS AND LIMITATIONS OF THIS STUDY

- Large population-based database with detailed demographic and clinical information which allowed adjustment for temporal changes in many known risk factors for preterm birth
- Major clinical preterm birth subtypes were identified and subsequent neonatal outcomes were described by gestational age categories to provide clinically-relevant information
- Data on pregnancy and birth outcomes were collected and coded consistently over the study period
- Clinical details on severity of some neonatal morbidities including necrotizing enterocolitis and retinopathy of prematurity were not available
- Coding for neonatal sepsis did not differentiate between sepsis confirmed by blood or cerebrospinal fluid culture and a clinical diagnosis of sepsis without microbiological confirmation, or between early-onset and late-onset sepsis

## INTRODUCTION

Preterm birth, defined as birth before 37 weeks' gestation, is the leading cause of neonatal mortality and morbidity, and a major risk factor for long-term neurological and respiratory morbidity and neurodevelopmental impairment.(1–3) In the United States, the rate of preterm birth increased by 24% between 1990 and 2006, from 10.6 to 13.1 per 100 live births, mainly due to an increase in obstetric intervention at late preterm (34–36 weeks' gestation).(4–6) More recently, preterm birth rates declined to 9.8 per 100 live births in the United States in 2015.(7,8) Nevertheless, the high rate of preterm birth remains a considerable concern.

Preterm birth can result from many possible etiologies.(9) The three major clinical subtypes of preterm birth include: clinician-initiated preterm birth, preterm birth following preterm premature rupture of membranes (PPROM), and preterm birth following spontaneous labor with intact membranes.(1,9) Clinician-initiated preterm birth, including labor induction and cesarean delivery without labor, constitutes about 30–40% of all preterm births, and pre-eclampsia/eclampsia and severe intrauterine growth restriction are the common indications.(9–11) Spontaneous preterm birth can result from multiple causes, including infection or inflammation, incompetent cervix, vascular/placental disorders (other than preeclampsia), and uterine over-distension.(9)

While gestational age at birth is the strongest predictor of adverse neonatal outcomes, the subtype of preterm birth is also important. Preterm infants born to women with spontaneous onset of labor have a better prognosis than infants born following clinician-initiated delivery.(5,12–15) However, it is unknown whether the temporal decline in preterm birth is associated with changes in neonatal mortality and morbidity among preterm infants.



1  
2  
3 Our aim was to describe temporal trends in gestational age-specific rates of neonatal  
4 mortality and a composite adverse outcome, defined as neonatal death or any severe morbidity,  
5 among preterm infants born following PPRM, spontaneous onset of labor and clinician-  
6 initiated delivery. We further examined gestational age-specific rates in the specific neonatal  
7 morbidity components included in the composite outcome.  
8  
9  
10  
11  
12  
13  
14  
15  
16

## 17 **METHODS**

### 18 **Study Population**

19 We carried out a population-based study including all singleton hospital births to mothers aged  
20 15 to 60 years in Washington State, U.S.A., between January 1, 2004, and December 31, 2013.  
21 We used information from two linked population databases: (1) live birth, fetal and infant death  
22 certificates with data on maternal demographic characteristics, obstetric history, and pregnancy  
23 and birth factors, from the Birth Events Record Database (BERD); and (2) hospitalization files  
24 with information on specific infant morbidities from the Comprehensive Hospital Abstract  
25 Reporting System (CHARS). The BERD included information abstracted by trained abstractors  
26 using standardized forms about maternal characteristics (e.g., maternal age, pre-pregnancy body  
27 mass index [BMI], race, education, marital status, smoking status, chronic hypertension, pre-  
28 pregnancy diabetes, and the type of health care insurance provider); obstetric history (e.g., parity,  
29 assisted conception); and pregnancy, labor, and birth characteristics (e.g., gestational age at  
30 delivery, use of tocolytics, use of steroids at delivery, mode of delivery, prolonged labor,  
31 congenital anomalies, neonatal death and birth outcomes). The CHARS database included  
32 information on all newborn hospitalizations in Washington State with diagnosis and procedure  
33 codes related to each hospitalization episode coded by the International Classification of  
34  
35  
36  
37  
38  
39  
40  
41  
42  
43  
44  
45  
46  
47  
48  
49  
50  
51  
52  
53  
54  
55  
56  
57  
58  
59  
60

1  
2  
3 Diseases, 9<sup>th</sup> Revision, Clinical Modification (ICD-9-CM). The completeness and accuracy of  
4 these databases was monitored by the Washington State Department of Health with annual  
5 assessments and consistency checks.(16–18) Records flagged with inconsistent or out-of-range  
6 entries were addressed systematically through hospital review and correction. The frequency of  
7 diagnostic and procedure codes was monitored in annual reports.(18) Previous validation studies  
8 of the linked dataset showed that the positive and negative predictive values (PPV and NPV) for  
9 delivery characteristics were above 80% and 98%, respectively; (19,20) for example, labor  
10 induction had PPV 89.0% and NPV 94.5%.(20) Gestational age at delivery was based on  
11 ultrasound dating, and last menstrual period dating was used for women with missing ultrasound  
12 data. We excluded infants born at less than 24 weeks' and greater than 45 weeks' gestation, and  
13 those with missing data on gestational age from the overall study population. After analysis of  
14 temporal trends in stillbirth, we excluded stillborn infants and those with missing mode of  
15 delivery to limit the analyses of neonatal outcomes following various types of preterm birth to  
16 live births only.  
17  
18  
19  
20  
21  
22  
23  
24  
25  
26  
27  
28  
29  
30  
31  
32  
33  
34  
35  
36  
37

### 38 **Classification of Preterm Birth**

39  
40 Preterm birth was defined as a live birth at 24 to 36 completed weeks' gestation. Preterm birth  
41 subtypes were categorized using the following algorithm: (1) first, spontaneous preterm births  
42 following PPRM ( $\geq 12$  hours); (2) second, clinician-initiated preterm births following labor  
43 induction or cesarean delivery without labor; and (3) third, all other births were classified as  
44 spontaneous preterm births following spontaneous labor onset with intact membranes  
45  
46  
47  
48  
49  
50  
51 (Supplementary File 1, items no 62, 64, 65).  
52  
53  
54  
55  
56  
57  
58  
59  
60

### Outcome Measures and Covariates

The primary outcomes were neonatal mortality and a composite adverse outcome including death or severe neonatal morbidity. Neonatal mortality was defined as death of an infant that occurred within the first 28 days after birth, including deaths in the delivery room, in-hospital deaths, and deaths after hospital discharge. Severe neonatal morbidity was identified using ICD-9-CM codes and included (a) bronchopulmonary dysplasia (BPD); (b) intraventricular hemorrhage grade  $\geq 3$  (IVH); (c) periventricular leukomalacia (PVL); (d) retinopathy of prematurity (ROP); (e) necrotizing enterocolitis (NEC), (f) neonatal sepsis; (g) convulsions of newborn; and (h) severe birth trauma (Appendix Table 1).

Temporal changes in maternal characteristics over the study period were examined, including maternal age (<20, 20-29, 30-39, 40+ years); pre-pregnancy BMI (underweight <18.5 kg/m<sup>2</sup>, normal BMI 18.5-24.9 kg/m<sup>2</sup>, overweight 25-29.9 kg/m<sup>2</sup>, and obese  $\geq 30$  kg/m<sup>2</sup>); race (non-Hispanic White, African American, Native American, Hispanic, and other); maternal education ( $\leq 8$  years vs. >8 years); smoking during pregnancy (yes/no); marital status (married/common law vs. other); parity (prior live births, yes/no); chronic hypertension (yes/no); pre-pregnancy diabetes (yes/no); assisted conception (yes/no); use of antenatal steroids (yes/no); use of tocolytics (yes/no); and type of health insurance coverage (Medicaid, self-pay, private, other). We also examined temporal trends in infant characteristics including gestational ages in completed weeks (within gestational age categories), small-for-gestational age infant (SGA, <10<sup>th</sup> percentile (21); yes/no), infant's sex (male/female), congenital anomalies, and stillbirths. Congenital anomalies were identified from BERD and included the following conditions observed within the first 24 hours after birth: anencephaly, meningomyelocele or spina bifida, cyanotic congenital heart disease, congenital diaphragmatic hernia, omphalocele, gastroschisis,

1  
2  
3 limb reduction, cleft lip, cleft palate, Down syndrome, chromosomal disorders, and hypospadias.  
4  
5 We adjusted for temporal trends in these conditions as a potential risk factor for adverse  
6  
7 outcomes. Stillbirth was defined as spontaneous intrauterine death of a fetus. Gestational age-  
8  
9 specific rates of stillbirths were calculated using the fetuses-at-risk (FAR) approach.(22) Under  
10  
11 this approach, ongoing pregnancies (fetuses in-utero) at each gestation were used as  
12  
13 denominators (the appropriate at-risk population) for the calculation of gestational age-specific  
14  
15 stillbirth rates.(22,23)  
16  
17  
18  
19  
20

## 21 **Statistical Analyses**

22  
23 The preterm birth rate was calculated as a proportion of live births at 24 to 36 weeks' gestation  
24  
25 among infants born alive at  $\geq 24$  weeks. Gestational age-specific temporal trends were described  
26  
27 as proportions of extremely preterm births (24-27 weeks), very preterm (28-31 weeks),  
28  
29 moderately preterm (32-33 weeks), and late preterm births (34-36 weeks). The Cochran-  
30  
31 Armitage test was used to assess the statistical significance of temporal trends over the years.  
32  
33 The rates of neonatal mortality and the composite outcome of neonatal death or severe morbidity  
34  
35 were also contrasted between years 2004-2006 vs. 2011-13, using rate ratio (RR) and rate  
36  
37 difference (RD) and 95% confidence intervals (CI).  
38  
39  
40  
41

42 Logistic regression was used to assess temporal trends in adverse neonatal outcomes  
43  
44 adjusted for temporal changes in risk factors that may have changed over the study period:  
45  
46 maternal age, pre-pregnancy BMI, race, education, smoking, marital status, parity, chronic  
47  
48 hypertension, pre-pregnancy diabetes, assisted conception, health insurance provider, gestational  
49  
50 age, SGA infant, sex, and congenital anomalies. Calendar year was modelled as a continuous  
51  
52 variable. Temporal trends in adverse outcomes were expressed as the average annual change in  
53  
54  
55  
56  
57

1  
2  
3 the odds of neonatal mortality and combined neonatal death or severe neonatal morbidity with  
4  
5 adjusted odds ratios (AOR) and 95% CI.  
6  
7  
8  
9

### 10 **Additional Analyses**

11  
12 Temporal trends in the individual components of the composite outcome were examined as  
13  
14 secondary outcomes using logistic regression models as described above. These analyses were  
15  
16 performed including all preterm live born infants, and also for subgroups of infants born at late  
17  
18 preterm, at 28-33 weeks, and at 24-27 weeks' gestation.  
19  
20  
21  
22  
23

24 All analyses were carried out using SAS 9.4 (SAS Institute Inc., Cary, NC, U.S.A.). Missing  
25  
26 values for BMI (approximately 10%) were imputed using multiple imputation (PROC MI). Other  
27  
28 missing values were <3.0% of the total, and the complete case multivariable analysis excluded  
29  
30 7.0% of preterm births. All p-values are reported as recommended by the American Statistical  
31  
32 Association.<sup>(24)</sup> All analyses were performed on publicly accessible de-identified data. An  
33  
34 exemption from ethics approval was granted by the Department of Social and Health Services,  
35  
36 State of Washington.  
37  
38  
39  
40  
41

### 42 **Patient and Public Involvement**

43  
44 No patients or public were directly involved in this study.  
45  
46  
47  
48  
49  
50  
51  
52  
53  
54  
55  
56  
57  
58  
59  
60

## RESULTS

### Study Population

Overall, 871 649 singleton births occurred in Washington State from 2004 to 2013. We excluded births at before 24 weeks or after 45 weeks' gestation, multiple births, births that occurred outside of Washington State and out-of-hospital births, as well as births that could not be matched with hospital records (N=116 886, 13.4%). The study population included 754 763 singleton infants born in hospital at  $\geq 24$  weeks; of these, 2 549 infants were stillborn (0.34%). Further, births with missing information on mode of delivery (N=14 503, 1.9%) were excluded for analyses of preterm birth rates by type of delivery (live births included 737 711 infants; Appendix Figure 1).

The rate of stillbirth increased slightly from 3.2 per 1000 total births in 2004-2006 to 3.7 in 2011-2013 ( $p=0.002$ ). Stillbirth rates increased at 24-27 weeks (from 0.7 to 1.0 per 1000 fetuses-at-risk (FAR),  $p=0.003$ ), and at 28-31 weeks' gestation (from 0.4 to 0.7 per 1000 FAR,  $p=0.002$ ; Appendix Figure 2).

Maternal characteristics changed over the study period; women who delivered in 2011-2013 were older, more educated, and had higher pre-pregnancy BMI than those who gave birth in 2004-2006 (Table 1). The proportions of births to mothers of Hispanic and African American origin, unmarried mothers, and nulliparous mothers increased, while the proportions of mothers who smoked during pregnancy decreased over time. More mothers had chronic hypertension or pre-pregnancy diabetes, and more pregnancies occurred from assisted conception in 2011-2013 than in 2004-2006. The use of antenatal steroids for lung maturation at delivery increased over the study period, while the use of tocolytics declined. All temporal changes were statistically significant ( $p<0.001$ , Table 1).

**Table 1.** Maternal and infant characteristics among all singleton infants born at  $\geq 24$  weeks' gestation), Washington State, U.S.A., 2004-2013.

| Characteristic                            | All Years<br>(2004-2013) | Period 1<br>(2004-2006) | Period 2<br>(2011-2013) | p-value*<br>(Period 2 vs.<br>Period 1) |
|-------------------------------------------|--------------------------|-------------------------|-------------------------|----------------------------------------|
| Total singleton births                    | 754 763                  | 219 233                 | 225 429                 |                                        |
| Maternal age (years)                      |                          |                         |                         | <0.001                                 |
| <20                                       | 57 042 (7.5)             | 18 454 (8.4)            | 13 603 (6.0)            |                                        |
| 20-29                                     | 387 712 (51.4)           | 114 244 (52.1)          | 112 427 (49.9)          |                                        |
| 30-39                                     | 287 479 (38.1)           | 80 300 (36.6)           | 92 175 (40.9)           |                                        |
| $\geq 40$                                 | 22 530 (3.0)             | 6 235 (2.8)             | 7 224 (3.2)             |                                        |
| Maternal BMI (kg/m <sup>2</sup> )         |                          |                         |                         | <0.001                                 |
| Underweight (<18.5)                       | 21 563 (2.9)             | 6 467 (3.0)             | 6 477 (2.9)             |                                        |
| Normal (18.5-24.9)                        | 324 689 (43.0)           | 91 968 (42.0)           | 97 451 (43.2)           |                                        |
| Overweight (25-29.9)                      | 177 020 (23.5)           | 47 444 (21.6)           | 55 439 (24.6)           |                                        |
| Obese ( $\geq 30$ )                       | 162 030 (21.5)           | 41 138 (18.8)           | 53 556 (23.8)           |                                        |
| Missing values                            | 69 461 (9.2)             | 32 216 (14.7)           | 12 506 (5.6)            |                                        |
| Maternal race                             |                          |                         |                         | <0.001                                 |
| Non-Hispanic White                        | 480 468 (63.7)           | 143 356 (65.4)          | 141 132 (62.6)          |                                        |
| African American                          | 34 112 (4.5)             | 8 964 (4.1)             | 11 098 (4.9)            |                                        |
| Native American                           | 14 962 (2.0)             | 4 503 (2.1)             | 4 265 (1.9)             |                                        |
| Hispanic                                  | 144 035 (19.1)           | 40 603 (18.5)           | 42 543 (18.9)           |                                        |
| Other                                     | 77 638 (10.3)            | 20 558 (9.4)            | 25 266 (11.2)           |                                        |
| Type of health insurance                  |                          |                         |                         | <0.001                                 |
| Medicaid                                  | 298 366 (39.5)           | 83 608 (38.1)           | 91 829 (40.7)           |                                        |
| Self-Pay                                  | 7 369 (1.0)              | 2 100 (1.0)             | 2 561 (1.1)             |                                        |
| Private                                   | 386 778 (51.2)           | 109 452 (49.9)          | 115 198 (51.1)          |                                        |
| Other**                                   | 42 500 (5.6)             | 13 375 (6.1)            | 12 013 (5.3)            |                                        |
| Maternal education ( $\leq 8$ years)      | 27 731 (3.6)             | 9 958 (4.5)             | 6 334 (2.8)             | <0.001                                 |
| Smoking during pregnancy                  | 72 846 (9.7)             | 22 073 (10.1)           | 20 339 (9.0)            | <0.001                                 |
| Unmarried                                 | 252 963 (33.5)           | 69 033 (31.5)           | 77 143 (34.2)           | <0.001                                 |
| No prior live births                      | 310 297 (41.1)           | 88 552 (40.4)           | 92 232 (40.9)           | <0.001                                 |
| Chronic hypertension                      | 9 669 (1.3)              | 2 650 (1.2)             | 3 002 (1.3)             | 0.003                                  |
| Pre-pregnancy diabetes                    | 5 472 (0.7)              | 1 367 (0.6)             | 1 755 (0.8)             | <0.001                                 |
| Assisted conception                       | 6 887 (0.9)              | 1 551 (0.7)             | 2 487 (1.1)             | <0.001                                 |
| Gestational age (weeks)                   |                          |                         |                         | <0.001                                 |
| 24-27                                     | 2 495 (0.3)              | 678 (0.3)               | 820 (0.4)               |                                        |
| 28-31                                     | 4 649 (0.6)              | 1 299 (0.6)             | 1 520 (0.7)             |                                        |
| 32-33                                     | 6 063 (0.8)              | 1 640 (0.8)             | 1 919 (0.9)             |                                        |
| 34-36                                     | 41 775 (5.5)             | 12 808 (5.8)            | 12 072 (5.4)            |                                        |
| $\geq 37$                                 | 699 781 (92.7)           | 202 808 (92.5)          | 209 098 (92.8)          |                                        |
| SGA infant (<10 <sup>th</sup> percentile) | 6 590 (0.9)              | 1 767 (0.8)             | 2 122 (0.9)             | <0.001                                 |
| Infant sex (male)                         | 386 468 (51.2)           | 112 128 (51.2)          | 116 049 (51.5)          | 0.026                                  |
| Congenital anomalies***                   | 3 656 (0.5)              | 996 (0.5)               | 1 133 (0.5)             | 0.066                                  |

BMI, pre-pregnancy body mass index; SGA, small-for-gestational-age

\* p-value for Chi-square test comparing Period 1 and 2.

\*\* Includes other government insurance, student insurance, Indian Health Care, and other programs.

\*\*\* Includes the following conditions observed within first 24 hours after birth: anencephaly, meningomyelocele or spina bifida, cyanotic congenital heart disease, congenital diaphragmatic hernia, omphalocele, gastroschisis, limb reduction, cleft lip, cleft palate, Down syndrome, chromosomal disorders, and hypospadias.

Note: Some percentages do not add up due to missing values; missing values <3% are not shown.

### Preterm Birth Rates

There were 737 711 singleton live births between 2004 and 2013; out of these, 52 014 infants were born preterm (7.1%). Among the preterm infants, 16.4% were born following PPROM, 43.7% were born following spontaneous onset of labor, and 39.9% were born following clinician-initiated delivery (Appendix Table 2). The overall preterm birth rate declined from 7.3% in 2004-2006 to 7.0% of singleton live births in 2011-2013. This decline was attributed to the decline in spontaneous delivery following PPROM (1.3% to 1.1%), and spontaneous onset of labor (3.2% to 3.0%). In contrast, clinician-initiated preterm birth increased slightly from 2.7% to 2.9% (all p-values for trend <0.01; Figure 1).

Gestational age-specific trends in the type of preterm birth varied (Figure 2). There were 1 833 live births at 24-27 weeks (0.2%); of these 27.8% were PPROM, 29.0% were spontaneous onset of labor, and 43.2% were clinician-initiated delivery. At 28-31 weeks, there were 4 095 live births (0.6%); 22.3% were PPROM, 30.6% were spontaneous onset of labor, and 47.2% were clinician-initiated. At 32-33 weeks, there were 5 664 live births (0.8%); 22.7% were PPROM, 35.1% were spontaneous onset of labor, and 42.2% were clinician-initiated. At 34-36 weeks, there were 40,422 live births (5.5%); 14.4% were PPROM, 46.9% were spontaneous onset of labor, and 38.7% were clinician-initiated. The overall preterm birth rate increased in all



gestational age categories except for late preterm births where the rate declined from 5.8% to 5.3% (all  $p < 0.01$ ). In each gestational age category, the clinician-initiated preterm birth rate increased, and the PPROM preterm birth rate declined over time (all  $p < 0.05$ ).

### Neonatal Mortality

Neonatal mortality remained unchanged over time (1.3%, Table 2). Neonatal mortality increased among late preterm infants between 2004-2006 and 2011-2013 (RR 1.25, 95% CI 0.85-1.84; average change per year AOR 1.064, 95% CI 1.003-1.129; Table 2). Overall, higher neonatal mortality was among infants delivered following PPROM (1.7%) and clinician-initiated delivery (1.6%) as compared with spontaneous delivery (0.8%).

A significant decline in mortality was observed among infants born following clinician-initiated delivery at 32-33 weeks, from 2.5% in 2004-2006 to 1.0% in 2011-2013 (RR 0.40, 95% CI 0.17-0.95; AOR 0.85, 95% CI 0.74-0.97; Table 3). In contrast, neonatal mortality increased from 0.5% to 0.8% (RR 1.60, 95% CI 0.94-2.73; AOR 1.10, 95% CI 1.01-1.20) among infants following clinician-initiated delivery at 34-36 weeks.

**Table 2.** Gestational age-specific rates of adverse neonatal outcomes among singleton preterm infants, Washington State, U.S.A., 2004-2013.

| Outcome and gestational age category | Rates per 100 live births |            |                     | Adjusted odds ratio per 1-year change† (95% CI) |
|--------------------------------------|---------------------------|------------|---------------------|-------------------------------------------------|
|                                      | N (Rate)                  |            | Rate ratio (95% CI) |                                                 |
|                                      | 2004-2006                 | 2011-2013  |                     |                                                 |
| Neonatal death                       |                           |            |                     |                                                 |
| 24-27 weeks                          | 76 (15.5)                 | 85 (14.2)  | 0.92 (0.67-1.25)    | 0.97 (0.92-1.03)                                |
| 28-31                                | 55 (4.9)                  | 40 (3.0)   | 0.61 (0.41-0.92)    | 0.95 (0.89-1.01)                                |
| 32-33                                | 23 (1.6)                  | 18 (1.0)   | 0.63 (0.34-1.16)    | 0.93 (0.84-1.02)                                |
| 34-36                                | 43 (0.4)                  | 64 (0.5)   | 1.25 (0.85-1.84)    | 1.06 (1.00-1.13)                                |
| All (24-36)                          | 197 (1.3)                 | 207 (1.3)  | 1.00 (0.82-1.22)    | 0.99 (0.95-1.02)                                |
| Neonatal death/severe morbidity      |                           |            |                     |                                                 |
| 24-27 weeks                          | 353 (72.2)                | 429 (71.7) | 0.99 (0.86-1.14)    | 1.00 (0.96-1.04)                                |
| 28-31                                | 383 (33.7)                | 496 (36.6) | 1.08 (0.95-1.24)    | 1.03 (1.00-1.06)                                |

|             |             |              |                  |                  |
|-------------|-------------|--------------|------------------|------------------|
| 32-33       | 166 (11.3)  | 302 (16.3)   | 1.44 (1.19-1.74) | 1.05 (1.02-1.08) |
| 34-36       | 307 (2.5)   | 639 (5.4)    | 2.16 (1.89-2.47) | 1.10 (1.08-1.12) |
| All (24-36) | 1 209 (7.9) | 1 866 (11.9) | 1.51 (1.40-1.62) | 1.06 (1.05-1.08) |

CI, confidence interval; severe morbidity includes BPD, IVH grade $\geq$ 3, PVL, ROP, NEC, neonatal sepsis, convulsions of newborn, and severe birth trauma.

Adjusted odds ratios express the average annual change in the odds of the outcome.

†Calendar year was modelled as a continuous variable; adjusted for temporal changes in maternal age, BMI, race, education, smoking, marital status, parity, chronic hypertension, pre-pregnancy diabetes, assisted conception, health insurance provider, gestational age, SGA infant, sex, and congenital anomalies.

**Table 3.** Gestational age-specific rates of neonatal death by subtype of preterm birth, Washington State, U.S.A., 2004-2013.

| Gestational age category and preterm birth subtype | Neonatal death                    |           | Rate ratio (95% CI) | Adjusted odds ratio per 1-year change† (95% CI) |
|----------------------------------------------------|-----------------------------------|-----------|---------------------|-------------------------------------------------|
|                                                    | N (per 100 live births) 2004-2006 | 2011-2013 |                     |                                                 |
| 24-27 weeks                                        |                                   |           |                     |                                                 |
| PPROM                                              | 27 (14.9)                         | 18 (13.9) | 0.93 (0.51-1.69)    | 1.05 (0.94-1.17)                                |
| Spontaneous labor                                  | 21 (15.6)                         | 26 (13.8) | 0.88 (0.50-1.57)    | 0.95 (0.86-1.06)                                |
| Clinician-initiated                                | 28 (16.2)                         | 41 (14.7) | 0.91 (0.56-1.47)    | 0.94 (0.86-1.03)                                |
| 28-31 weeks                                        |                                   |           |                     |                                                 |
| PPROM                                              | 14 (4.8)                          | 5 (1.9)   | 0.40 (0.14-1.10)    | 0.92 (0.78-1.07)                                |
| Spontaneous labor                                  | 11 (3.1)                          | 9 (2.2)   | 0.71 (0.30-1.71)    | 0.91 (0.77-1.06)                                |
| Clinician-initiated                                | 30 (6.2)                          | 26 (3.8)  | 0.61 (0.36-1.04)    | 0.96 (0.88-1.06)                                |
| 32-33 weeks                                        |                                   |           |                     |                                                 |
| PPROM                                              | 2 (0.5)                           | 5 (1.2)   | 2.40 (0.47-12.37)   | 1.08 (0.80-1.45)                                |
| Spontaneous labor                                  | 7 (1.3)                           | 5 (0.8)   | 0.62 (0.20-1.94)    | 0.97 (0.83-1.13)                                |
| Clinician-initiated                                | 14 (2.5)                          | 8 (1.0)   | 0.40 (0.17-0.95)    | 0.85 (0.74-0.97)                                |
| 34-36 weeks                                        |                                   |           |                     |                                                 |
| PPROM                                              | 14 (0.7)                          | 7 (0.4)   | 0.57 (0.23-1.42)    | 0.97 (0.84-1.12)                                |
| Spontaneous labor                                  | 7 (0.1)                           | 22 (0.4)  | 4.00 (1.71-9.36)    | 1.08 (0.96-1.20)                                |
| Clinician-initiated                                | 22 (0.5)                          | 35 (0.8)  | 1.60 (0.94-2.73)    | 1.10 (1.01-1.20)                                |
| All (24-36 weeks)                                  |                                   |           |                     |                                                 |
| PPROM                                              | 57 (2.1)                          | 35 (1.4)  | 0.67 (0.44-1.02)    | 1.00 (0.93-1.07)                                |
| Spontaneous labor                                  | 46 (0.7)                          | 62 (0.9)  | 1.29 (0.88-1.88)    | 0.98 (0.92-1.04)                                |
| Clinician-initiated                                | 94 (1.6)                          | 110 (1.7) | 1.06 (0.81-1.40)    | 0.98 (0.94-1.03)                                |

PPROM, preterm premature rupture of membranes; CI, confidence interval

Adjusted odds ratios express the average annual change in the odds of neonatal death.

†Calendar year was modelled as a continuous variable; adjusted for temporal changes in maternal age, BMI, race, education, smoking, marital status, parity, chronic hypertension, pre-pregnancy diabetes, assisted conception, health insurance provider, gestational age, SGA infant, sex, and congenital anomalies.

### **Composite outcome: Neonatal Mortality or Severe Morbidity**

The rate of combined mortality or severe morbidity increased from 7.9% in 2004-2006 to 11.9% in 2011-2013 (RR 1.51, 95% CI 1.40-1.62; average change per year AOR 1.06, 95% CI 1.05-1.08; Table 2). This increase was predominately due to an increase in combined mortality or severe morbidity among infants born at 32-33 weeks and 34-36 weeks' gestation (RR 1.44, 95% CI 1.19-1.74, and RR 2.16, 95% CI 1.89-2.47, respectively); the relative average increase in the odds of combined neonatal mortality or severe morbidity was 5% per year among infants born at 32-33 weeks (AOR 1.05, 95% CI 1.02-1.08), and 10% per year among infants born at 34-36 weeks (AOR 1.10, 95% CI 1.08-1.12). Rate differences are shown in Appendix Table 3.

The rate of composite neonatal mortality or severe morbidity increased in each preterm birth subtype (all  $p < 0.001$ , Table 4). The rate was highest among infants born following PPROM (14.8%), and these infants had the largest relative increase (10% per year) in combined mortality or severe morbidity over the study period (AOR 1.10, 95% CI 1.07-1.13). Gestational age-specific analyses of trends in combined neonatal mortality or severe morbidity showed an increase in the rates among infants born at 34-36 weeks in all subtypes of preterm birth (PPROM: RR 2.20, 95% CI 1.64-2.96; spontaneous: RR 2.32, 95% CI 1.85-2.90; clinician-initiated: RR 2.04, 95% CI 1.65-2.51; Table 4), and increases in the rates among infants born following PPROM at 28-31 weeks (AOR 1.07, 95% CI 1.02-1.13) and 32-33 weeks (AOR 1.12, 95% CI 1.06-1.19). In addition, a significant increase in combined neonatal mortality or severe morbidity was observed among infants born following spontaneous-onset of labor at 24-27 weeks' gestation (AOR 1.09, 95% CI 1.01-1.17). In contrast, clinician-initiated delivery at 24-27 weeks was associated with a decline in the rate of composite adverse outcome (AOR 0.93, 95% CI 0.87-0.99).

**Table 4.** Gestational age-specific rates of neonatal death/severe morbidity by subtype of preterm birth, Washington State, U.S.A., 2004-2013.

| Gestational age category and preterm birth subtype | Neonatal death/severe morbidity   |            | Rate ratio (95% CI) | Adjusted odds ratio per 1-year change† (95% CI) |
|----------------------------------------------------|-----------------------------------|------------|---------------------|-------------------------------------------------|
|                                                    | N (per 100 live births) 2004-2006 | 2011-2013  |                     |                                                 |
| 24-27 weeks                                        |                                   |            |                     |                                                 |
| PPROM                                              | 133 (73.5)                        | 98 (75.4)  | 1.03 (0.79-1.33)    | 1.01 (0.94-1.10)                                |
| Spontaneous labor                                  | 89 (65.9)                         | 142 (75.1) | 1.14 (0.87-1.49)    | 1.09 (1.01-1.17)                                |
| Clinician-initiated                                | 131 (75.7)                        | 189 (67.7) | 0.89 (0.72-1.12)    | 0.93 (0.87-0.99)                                |
| 28-31 weeks                                        |                                   |            |                     |                                                 |
| PPROM                                              | 101 (34.2)                        | 112 (42.4) | 1.24 (0.95-1.62)    | 1.07 (1.02-1.13)                                |
| Spontaneous labor                                  | 112 (31.4)                        | 144 (34.6) | 1.10 (0.86-1.41)    | 1.02 (0.98-1.08)                                |
| Clinician-initiated                                | 170 (35.2)                        | 240 (35.5) | 1.01 (0.83-1.23)    | 1.02 (0.98-1.06)                                |
| 32-33 weeks                                        |                                   |            |                     |                                                 |
| PPROM                                              | 42 (11.0)                         | 90 (22.0)  | 2.00 (1.39-2.88)    | 1.12 (1.06-1.19)                                |
| Spontaneous labor                                  | 60 (11.3)                         | 87 (13.4)  | 1.19 (0.85-1.65)    | 1.01 (0.96-1.07)                                |
| Clinician-initiated                                | 64 (11.5)                         | 125 (15.8) | 1.37 (1.02-1.86)    | 1.04 (0.99-1.08)                                |
| 34-36 weeks                                        |                                   |            |                     |                                                 |
| PPROM                                              | 67 (3.5)                          | 129 (7.7)  | 2.20 (1.64-2.96)    | 1.13 (1.08-1.18)                                |
| Spontaneous labor                                  | 111 (1.9)                         | 245 (4.4)  | 2.32 (1.85-2.90)    | 1.09 (1.06-1.13)                                |
| Clinician-initiated                                | 129 (2.8)                         | 265 (5.7)  | 2.04 (1.65-2.51)    | 1.10 (1.07-1.13)                                |
| All (24-36 weeks)                                  |                                   |            |                     |                                                 |
| PPROM                                              | 343 (12.4)                        | 429 (17.3) | 1.40 (1.21-1.61)    | 1.10 (1.07-1.13)                                |
| Spontaneous labor                                  | 372 (5.5)                         | 618 (9.1)  | 1.65 (1.45-1.88)    | 1.06 (1.04-1.09)                                |
| Clinician-initiated                                | 494 (8.6)                         | 819 (12.9) | 1.50 (1.34-1.68)    | 1.05 (1.03-1.07)                                |

PPROM, preterm premature rupture of membranes; CI, confidence interval, severe morbidity includes BPD, IVH grade $\geq$ 3, PVL, ROP, NEC, neonatal sepsis, convulsions of newborn, and severe birth trauma.

Adjusted odds ratios express the average annual change in the odds of neonatal death and/or morbidity.

†Calendar year was modelled as a continuous variable; adjusted for temporal changes in maternal age, BMI, race, education, smoking, marital status, parity, chronic hypertension, pre-pregnancy diabetes, assisted conception, health insurance provider, gestational age, SGA infant, sex, and congenital anomalies.

### Additional analyses

The most prominent temporal trend in the rates of specific severe neonatal morbidities was an increase in the rate of neonatal sepsis, from 4.5% in 2004-2006 to 8.5% in 2011-2013 (AOR 1.09, 95% CI 1.08-1.11). The rate of sepsis increased substantially among late preterm infants from 1.7% to 4.5% (AOR 1.12, 95% CI 1.10-1.14), infants born at 28-33 weeks (AOR 1.07, 95%

1  
2  
3 CI 1.05-1.10), and those born at 24-27 weeks (AOR 1.05, 95% CI 1.01-1.09). In contrast, the  
4  
5 rate of BPD among preterm infants decreased from 2.0% to 1.7% (AOR 0.95, 95% CI 0.93-0.98;  
6  
7 Appendix Table 4), mainly in infants born at 28-33 weeks (AOR 0.93, 95% CI 0.89-0.97).  
8  
9  
10

## 11 12 **DISCUSSION**

13  
14 Our findings show a decline in the preterm birth rate in Washington State between 2004 and  
15  
16 2013 that was predominately due to a decline in spontaneous preterm birth (PPROM and  
17  
18 spontaneous preterm labor), while clinician-initiated preterm deliveries increased slightly. These  
19  
20 changes were associated with increased mortality among late preterm infants born following  
21  
22 clinician-initiated delivery and increased rates of the composite outcome of neonatal mortality or  
23  
24 severe morbidity among all late preterm infants. The rise in neonatal morbidity was driven  
25  
26 mainly by the increase in the rate of neonatal sepsis.  
27  
28  
29

30  
31 After a large increase in the preterm birth rate in the United States in the early 2000s, a  
32  
33 decline was observed from 12.8% in 2006 to 9.8% in 2015.(4–8) A recent study by Gyamfi-  
34  
35 Bannerman *et al.* showed a decline in both clinician-initiated and spontaneous preterm birth rates  
36  
37 between 2005 and 2012.(10) Our study provides more detailed information on preterm birth  
38  
39 categories and describes temporal trends in neonatal outcomes adjusted for changes in important  
40  
41 risk factors.  
42  
43

44  
45 Obstetric interventions, changes in practice patterns, and implementation of specific  
46  
47 evidence-based guidelines for high-risk women may be reasons behind the decline in preterm  
48  
49 birth following spontaneous onset of labor. The use of 17  $\alpha$ -hydroxyprogesterone caproate (17P)  
50  
51 for women with previous spontaneous preterm births, and the use of vaginal progesterone for  
52  
53 select women with short cervical length and without prior preterm birth progressively increased  
54  
55  
56  
57

1  
2  
3 between 2006 and 2013 and may have led to a decline in spontaneous preterm births.(6,25–29)  
4  
5 More aggressive pursuit of expectant management in PPRM, preeclampsia and intrauterine  
6  
7 growth restriction may have led to a delivery at later gestation in high-risk mothers.(30–32)  
8  
9  
10 Other changes including declines in births to teenage mothers may have contributed to an overall  
11  
12 decline in the preterm birth rate, while increases in maternal age, obesity, and assisted  
13  
14 conception have likely contributed to an increase in clinician-initiated delivery in general.(33–  
15  
16  
17 35)

18  
19 In 1999 and 2009, the American College of Obstetrics and Gynecologists (ACOG)  
20  
21 advocated against elective deliveries under 39 weeks of gestation in an effort to prevent non-  
22  
23 medically-indicated preterm births and the potentially avoidable morbidity associated with these  
24  
25 deliveries.(36,37) Previous studies have shown that timely medically-indicated clinician-initiated  
26  
27 delivery can prevent stillbirth and reduce neonatal mortality.(23,38,39) A population-based study  
28  
29 of all births in the United States showed that the 68% increase in clinician-initiated preterm  
30  
31 births between 1995 and 2005 was not associated with increased rates of neonatal  
32  
33 mortality/morbidity.(5) In our study, the small increase in clinician-initiated interventions was  
34  
35 associated with reduced mortality at 32-33 weeks and reduced mortality/severe morbidity at 24-  
36  
37 27 weeks. However, at late preterm, declines in spontaneous and PPRM birth and increases in  
38  
39 clinician-initiated delivery were associated with increased rates of mortality/severe morbidity.  
40  
41 This may be due temporal increase in maternal chronic morbid conditions that we did not adjust  
42  
43 for in our study, for example, asthma, autoimmune conditions, or respiratory morbidity.  
44  
45  
46  
47  
48

49 The increase in neonatal sepsis was observed in all subtypes of late preterm birth, which  
50  
51 points to possible common causes relatively independent of delivery type. However, the  
52  
53 pathology of neonatal sepsis can vary by preterm birth subtype (for example, originating from  
54  
55  
56  
57  
58  
59  
60

1  
2  
3 the effects of chorioamnionitis in PPRM, or IUGR in clinician-initiated delivery), and the  
4  
5 uniform increase may be due to the broad definition of sepsis in our study, which included early  
6  
7 and late onset sepsis. This unfavorable trend in adverse neonatal outcomes in our study thus  
8  
9 warrants further investigation, as prior studies of clinical sepsis (defined broadly as ‘other  
10  
11 infection specific to neonatal period’) in the first 3 months after birth showed a small decline  
12  
13 between 1988 and 2006 among preterm infants in the U.S.A.(40) The reasons behind the  
14  
15 increased rates of sepsis in our study may include temporal changes in the proportion of  
16  
17 vulnerable infants, increased use of antenatal steroids, or changes in antibiotic use and antibiotic  
18  
19 resistance.(40,41) Currently, there is lack of clinical diagnostic criteria or ideal laboratory marker  
20  
21 for neonatal sepsis with excellent sensitivity for daily clinical operations, rendering the  
22  
23 assessment of variation in the incidence rates of neonatal sepsis difficult.(41–43) Antibiotics are  
24  
25 essential in the treatment of bacterial sepsis, and are the most commonly used medications in  
26  
27 neonatal intensive units; however, overly liberal antimicrobial use has been associated with  
28  
29 increased adverse neonatal outcomes.(44) A large population study in California showed  
30  
31 substantial variations in antibiotic use that was not related to proven infection, NEC, surgical  
32  
33 case volume, or Neonatal Intensive Care Unit (NICU) mortality, especially among community  
34  
35 and intermediate NICUs.(44) Unified diagnostic criteria and antimicrobial policies are needed to  
36  
37 further examine and address this issue.  
38  
39  
40  
41  
42  
43

44  
45 The strengths of our study include a large population-based database with detailed  
46  
47 information on demographic and clinical risk factors (e.g., BMI, assisted conception) and  
48  
49 obstetric history (e.g., parity, prior adverse outcomes). We were, therefore, able to adjust for  
50  
51 temporal changes in a large spectrum of known risk factors for preterm birth. Data on pregnancy  
52  
53 and birth outcomes were collected consistently over the study period, and neonatal morbidity  
54  
55  
56  
57



1  
2  
3 was also coded consistently using exclusively ICD-9-CM during the entire study period. The  
4  
5 ICD-9-CM code for neonatal sepsis did not change over the study period, and there was no  
6  
7 indication of any major changes in clinical diagnostic criteria.  
8  
9

10 This study has a few limitations. First, clinical details on severity of some neonatal  
11 morbidity were not available, for example, the NEC Stage I or ROP Grade I, both of which can  
12 be treated conservatively. This led to the inclusion of infants with less severe NEC and ROP or  
13 other components of the composite outcome. Second, the ICD-9-CM code for neonatal sepsis did  
14 not differentiate between sepsis confirmed by blood or cerebrospinal fluid culture and a clinical  
15 diagnosis of sepsis without microbiological confirmation, or between early-onset and late-onset  
16 sepsis. This could lead to over-diagnosis of neonatal infection. Third, information on termination  
17 of pregnancy was not available; thus, we could not account for these temporal changes.  
18 However, the vast majority of pregnancy terminations are likely to occur prior to 24 weeks'  
19 gestation; terminations beyond 23 weeks would be included as stillbirths in this study. Temporal  
20 changes in gestational age-specific stillbirth rates showed small increases in stillbirth rates at 24-  
21 27 weeks and 28-31 weeks, which augments the upward trend in adverse neonatal outcome  
22 (mortality or severe morbidity) at 28-31 weeks' gestation. Fourth, potential errors and omissions  
23 are inevitable in large databases; these may have led to non-differential misclassification, which  
24 may have resulted in the underestimation of temporal trends. Fifth, the data sources had detailed  
25 information on mode of delivery that allowed accurate categorization of preterm birth subtypes;  
26 however, this categorization may have overestimated the proportion of deliveries following  
27 PPROM.<sup>(45)</sup> Data collection had not changed over the study period, however, changes in  
28 physician's preferences for specific mode of delivery (e.g., trial of labor before cesarean  
29 delivery) may be responsible for year-to-year fluctuation in temporal trends in preterm birth  
30  
31  
32  
33  
34  
35  
36  
37  
38  
39  
40  
41  
42  
43  
44  
45  
46  
47  
48  
49  
50  
51  
52  
53  
54  
55  
56  
57



1  
2  
3 subtypes. Lastly, a relatively large number of temporal trends were assessed, possibly rendering  
4  
5 some trends statistically significant due to chance. In addition, singleton infants excluded due to  
6  
7 out-of-hospital delivery or missing values may have impacted our results, however, non-hospital  
8  
9 births are more likely to be term deliveries without complications requiring hospitalization.

10  
11 Washington State has one of the lowest preterm birth rates in the USA, and lowest infant  
12  
13 mortality rates;(46) however, the ranking is very much dependent on the ethnicity, age, and  
14  
15 socioeconomic status composition of the obstetric population.(46) We adjusted for a number of  
16  
17 these indices thus our results are relevant to other states in the U.S.A. and high-income countries  
18  
19 in general.  
20  
21  
22  
23  
24  
25  
26  
27  
28  
29  
30  
31  
32  
33  
34  
35  
36  
37  
38  
39  
40  
41  
42  
43  
44  
45  
46  
47  
48  
49  
50  
51  
52  
53  
54  
55  
56  
57  
58  
59  
60

## CONCLUSION

Our objectives were to assess temporal trends in gestational age-specific rates of neonatal mortality and a composite outcome of neonatal mortality or severe morbidity among preterm infants. The small decline in the preterm birth rate in Washington State from 2004 to 2013 was predominantly due to a decline in the rates of spontaneous onset of labor and PPRM at late preterm. This was associated with increased neonatal mortality among late preterm infants born following clinician-initiated delivery, and increased rate of composite outcome including neonatal death or severe morbidity among all late preterm infants. The increase in adverse neonatal outcomes among late preterm infants and increase in sepsis rates among all preterm infants warrant further investigation. Our results are important for identifying areas for improvement in obstetric and neonatal health care, and serve as hypothesis generating findings to direct further research.

1  
2  
3 List of tables:  
4

5 Table 1. Maternal and infant characteristics among all singleton infants born at  $\geq 24$  weeks'  
6 gestation), Washington State, U.S.A., 2004-2013.  
7

8 Table 2. Gestational age-specific rates of adverse neonatal outcomes among singleton preterm  
9 infants, Washington State, U.S.A., 2004-2013.  
10

11 Table 3. Gestational age-specific rates of neonatal death by subtype of preterm birth, Washington  
12 State, U.S.A., 2004-2013.  
13

14 Table 4. Gestational age-specific rates of neonatal death/severe morbidity by subtype of preterm  
15 birth, Washington State, U.S.A., 2004-2013.  
16  
17

18  
19 List of figures:  
20

21 Figure 1. Temporal trends in the rates of singleton preterm birth following preterm premature  
22 rupture of membranes (PPROM), spontaneous labor and clinician-initiated delivery, Washington  
23 State, U.S.A., 2004-2013.  
24

25 Figure 2. Temporal trends in gestational-age specific preterm birth rates following preterm  
26 premature rupture of membranes (PPROM), spontaneous labor and clinician-initiated delivery; at  
27 24-27 weeks (Panel A), 28-31 weeks (Panel B), 32-33 weeks (Panel C), and 34-36 weeks (Panel  
28 D); Washington State, U.S.A., 2004-2013.  
29  
30  
31

32  
33 Supplement:  
34

35 Supplemental File 1: Washington State Birth Filing Form – sample.  
36

37 Appendix Table 1. Severe neonatal morbidity components and ICD-9-CM codes.  
38

39 Appendix Figure 1. Study population flow chart, Washington State, U.S.A., 2004-2013.  
40

41 Appendix Figure 2. Gestational age-specific rates of stillbirths calculated using the fetuses-at-  
42 risk (FAR) approach, Washington State, U.S.A., 2004-2013.  
43

44 Appendix Table 2. Preterm live births by gestational age categories and clinical subtype,  
45 Washington State, U.S.A., 2004-2013.  
46

47 Appendix Table 3 Gestational age-specific rates of adverse neonatal outcomes among singleton  
48 preterm infants, Washington State, U.S.A., 2004-2013.  
49

50 Appendix Table 4. Temporal trends in gestational-specific rates of severe neonatal morbidity  
51 components, Washington State, U.S.A., 2004-2013.  
52  
53  
54  
55  
56  
57

1. Goldenberg RL, Culhane JF, Iams JD, Romero R. Epidemiology and causes of preterm birth. *Lancet*. 2008;371(9606):75–84.
2. Saigal S, Doyle LW. An overview of mortality and sequelae of preterm birth from infancy to adulthood. *Lancet*. 2008;371(9608):261–9.
3. Kramer MS. The contribution of mild and moderate preterm birth to infant mortality. *JAMA*. 2000;284(7):843–9.
4. Martin J, Osterman M, Sutton P. Are preterm births on the decline in the United States? Recent data from the National Vital Statistics System. *NCHS Data Brief*. 2010;39:1–8.
5. Lisonkova S, Hutcheon JA, Joseph K. Temporal trends in neonatal outcomes following iatrogenic preterm delivery. *BMC Pregnancy Childbirth*. 2011;11(1):39–47.
6. Schoen CN, Tabbah S IJ. Why the United States preterm birth rate is declining. *AJOG*. 2015;213(2):175–80.
7. Martin J, Hamilton B, Osterman M. Births: Final data for 2015. Vol. 66, National Vital Statistics Report. 2017.
8. Hamilton B, Martin J, Osterman M. Births: Provisional data for 2016. 2017.
9. Villar J, Papageorghiou AT, Knight HE, Gravett MG, Iams J, Waller SA, et al. The preterm birth syndrome: a prototype phenotypic classification. *AJOG* [Internet]. 2012;206(2):119–23. Available from: <http://dx.doi.org/10.1016/j.ajog.2011.10.866>
10. Gyamfi-Bannerman C, Ananth C V. Trends in spontaneous and indicated preterm delivery among singleton gestations in the United States, 2005-2012. *Obstet Gynecol*. 2014;124(6):1069–74.
11. Ananth C V, Vintzileos AM. Maternal-fetal conditions necessitating a medical intervention resulting in preterm birth. *Am J Obstet Gynecol*. 2006;195:1557–63.

12. Reddy UM, Ko CW, Raju TNK, Willinger M. Delivery indications at late-preterm gestations and infant mortality rates in the United States. *Pediatrics*. 2009;124:234–40.
13. Morken NH, Källen K, Jacobsson B. Outcomes of preterm children according to type of delivery onset: A nationwide population-based study. *Paediatr Perinat Epidemiol*. 2007;
14. Kamath-Rayne BD, DeFranco EA, Chung E, Chen A. Subtypes of preterm birth and the risk of postneonatal death. *J Pediatr*. 2013;162(1):28–34.
15. Chen A, Feresu SA, Barsoom MJ. Heterogeneity of preterm birth subtypes in relation to neonatal death. *Obstet Gynecol*. 2009;114(3):516–22.
16. Washington State Department of Health Center for Health Statistics. Birth data quality technical notes [Internet]. 2016. Available from:  
<http://www.doh.wa.gov/Portals/1/Documents/5300/TechnicalNotes.pdf>
17. Hospital Inpatient Discharge Database Reports. CHARS reports 2010-2016. 2016.
18. Washington State Department of Health Comprehensive Abstract Reporting System. Procedure manual for submitting discharge data UB-40 and 837I 5010. 2013.
19. Lydon-Rochelle M, Holt V, Cardenas V. The reporting of pre-existing maternal medical conditions and complications of pregnancy on birth certificates and in hospital discharge data. *AJOG*. 2005;193(1):125–34.
20. Lydon-Rochelle M, Holt V, Nelson J. Accuracy of reporting maternal in-hospital diagnoses and intrapartum procedures in Washington State linked birth records. *Paediatr Perinat Epidemiol*. 2005;19(6):460–71.
21. Alexander GR, Himes JH, Kaufman RB, Mor J, Kogan M. A United States national reference for fetal growth. [Internet]. Vol. 87, *Obstetrics and gynecology*. 1996. p. 163–8. Available from: <http://www.ncbi.nlm.nih.gov/pubmed/8559516>

- 1  
2  
3 22. Joseph KS. Incidence-based measures of birth, growth restriction, and death can free  
4 perinatal epidemiology from erroneous concepts of risk. *J Clin Epidemiol*.  
5  
6 2004;57(9):889–97.  
7  
8  
9  
10 23. Joseph KS. Theory of obstetrics: An epidemiologic framework for justifying medically  
11 indicated early delivery. *BMC Pregnancy Childbirth*. 2007;7:1–15.  
12  
13  
14 24. Wasserstein RL, Lazar NA. The ASA’s statement on p -Values: context, process, and  
15 purpose. *Am Stat* [Internet]. 2016;70(2):129–33. Available from:  
16  
17 <https://www.tandfonline.com/doi/full/10.1080/00031305.2016.1154108>  
18  
19  
20  
21 25. Gyamfi-Bannerman C, Thom EA, Blackwell SC, Tita ATN, Reddy UM, Saade GR, et al.  
22 Antenatal betamethasone for women at risk for late preterm delivery. *N Engl J Med*.  
23  
24 2016;374(14):1311–20.  
25  
26  
27  
28 26. Henderson Z, Power M, Berghella V. Attitudes and practices regarding use of  
29 progesterone to prevent preterm births. *Am J Perinatol*. 2009;26(7):529–36.  
30  
31  
32  
33 27. Fonseca E, Celik E, Parra M. Progesterone and the risk of preterm birth among women  
34 with a short cervix. *NEJM*. 2007;357(5):462–9.  
35  
36  
37  
38 28. Berghella V, Rafael T, Szychowski J. Cerclage for short cervix on ultrasonography in  
39 women with singleton gestations and previous preterm birth: a meta-analysis. *Obs*  
40  
41 *Gynecol*. 2011;117(3):663–71.  
42  
43  
44  
45 29. Werner E, Han C, Pettker C. Universal cervical-length screening to prevent preterm birth:  
46 a cost-effectiveness analysis. *Ultrasound Obs Gynecol*. 2011;38(1):32–7.  
47  
48  
49  
50 30. Morris J, Roberts C, Bowen J. Immediate delivery compared with expectant management  
51 after preterm pre-labour rupture of the membranes close to term (PPROMT trial): a  
52  
53 randomised controlled trial. *Lancet*. 2016;387:444–52.  
54  
55  
56  
57  
58  
59  
60

- 1  
2  
3 31. Koopmans C, Bijlenga D, Groen H. Induction of labour versus expectant monitoring for  
4 gestational hypertension or mild pre-eclampsia after 36 weeks' gestation (HYPITAT): a  
5 multicentre, open-label randomised controlled trial. *Lancet*. 2009;374:979–88.  
6  
7
- 8  
9  
10 32. Lees C, Marlow N, Arabin B. Perinatal morbidity and mortality in early-onset fetal growth  
11 restriction: cohort outcomes of the trial of randomized umbilical and fetal flow in Europe  
12 (TRUFFLE). *Ultrasound Obs Gynecol*. 2013;42(2):400–8.  
13  
14
- 15  
16  
17 33. Ogden C, Carroll M, Kit B. Prevalence of childhood and adult obesity in the United  
18 States. *JAMA*. 2014;311(8):806–14.  
19
- 20  
21  
22 34. Lisonkova S, Muraca G, Potts J. Association between prepregnancy body mass index and  
23 severe maternal morbidity. *JAMA*. 2017;318(18):1777–86.  
24  
25
- 26  
27  
28 35. Lisonkova S, Potts J, Muraca G. Maternal age and severe maternal morbidity: population-  
29 based retrospective cohort study. *PLoS Med*. 2017;14(5):e1002307.  
30
- 31  
32  
33 36. American College of Obstetricians and Gynecologists. Induction of labor ACOG practice  
34 bulletin no. 10. 1999.  
35
- 36  
37  
38 37. American College of Obstetricians and Gynecologists. Induction of labor ACOG practice  
39 bulletin no. 107. 2009.  
40
- 41  
42  
43 38. Chang HH, Larson J BH. Preventing preterm births: analysis of trends and potential  
44 reductions with interventions in 39 countries with very high human development index.  
45 *Lancet*. 2013;381:223–34.  
46
- 47  
48  
49 39. Lisonkova S, Sabr Y, Butler B. International comparisons of preterm birth rates: higher  
50 rates of late preterm birth are associated with lower rates of stillbirth and neonatal death.  
51 *BJOG*. 2012;119(13):1630–9.  
52  
53
- 54  
55  
56 40. Lukacs S, Schrag S. Clinical sepsis in neonates and young infants, United States, 1988-

- 1  
2  
3 2006. *J Pediatr.* 2012;160(6):960–5.  
4  
5  
6 41. Ting JY, Synnes A, Roberts A, Deshpandey A, Dow K, Yoon EW, et al. Association  
7 between antibiotic use and neonatal mortality and morbidities in very low-birth-weight  
8 infants without culture-proven sepsis or necrotizing enterocolitis. *JAMA Pediatr.*  
9 2016;170(12):1181–7.  
10  
11  
12  
13  
14 42. Wynn JL. Defining neonatal sepsis. *Curr Opin Pediatr.* 2016;28(2):135–40.  
15  
16  
17 43. Ng P, Ma T, Lam H. The use of laboratory biomarkers for surveillance, diagnosis and  
18 prediction of clinical outcomes in neonatal sepsis and necrotising enterocolitis. *Arch Dis*  
19 *Child Fetal Neonatal Ed.* 2015;100(5):F448–52.  
20  
21  
22  
23  
24 44. Schulman J, Dimand R, Lee H. Neonatal intensive care unit antibiotic use. *Pediatrics.*  
25 2015;135(5):826–33.  
26  
27  
28 45. Stout M, Macones G, Tuuli M. Accuracy of birth certificate data for classifying preterm  
29 birth. *Paediatr Perinat Epidemiol.* 2017;31(3):245–9.  
30  
31  
32  
33 46. March of Dimes. Premature birth report card.  
34  
35 <https://www.marchofdimes.org/peristats/tools/reportcard.aspx?frmodrc=1&reg=53>, Accessed  
36  
37 Aug 25, 2018.  
38  
39  
40  
41  
42  
43  
44  
45  
46  
47  
48  
49  
50  
51  
52  
53  
54  
55  
56  
57  
58  
59  
60



1  
2  
3  
4  
5  
6  
7  
8  
9  
10  
11  
12  
13  
14  
15  
16  
17  
18  
19  
20  
21  
22  
23  
24  
25  
26  
27  
28  
29  
30  
31  
32  
33  
34  
35  
36  
37  
38  
39  
40  
41  
42  
43  
44  
45  
46  
47  
48  
49  
50  
51  
52  
53  
54  
55  
56  
57  
58  
59  
60



Figure 1. Temporal trends in the rates of singleton preterm birth following preterm premature rupture of membranes (PPROM), spontaneous labor and clinician-initiated delivery, Washington State, U.S.A., 2004-2013.

163x93mm (300 x 300 DPI)



Figure 2. Temporal trends in gestational-age specific preterm birth rates following preterm premature rupture of membranes (PPROM), spontaneous labor and clinician-initiated delivery; at 24-27 weeks (Panel A), 28-31 weeks (Panel B), 32-33 weeks (Panel C), and 34-36 weeks (Panel D); Washington State, U.S.A., 2004-2013.

279x215mm (300 x 300 DPI)



# Washington State Birth Filing Form

## For Hospital Use Only

|                            |                           |
|----------------------------|---------------------------|
| Mother's Medical Record #: | Child's Medical Record #: |
|----------------------------|---------------------------|

Plurality:  1- single birth     2- twin     3- triplet     Other \_\_\_\_\_

If multiple, this worksheet is for child:  1- first born     2- second born     3- third born     Other \_\_\_\_\_

## Child's Information

|                                                                                                                                                                                                                                                                              |        |                                                                                         |
|------------------------------------------------------------------------------------------------------------------------------------------------------------------------------------------------------------------------------------------------------------------------------|--------|-----------------------------------------------------------------------------------------|
| <b>*1. Child's Name</b>                                                                                                                                                                                                                                                      |        |                                                                                         |
| First                                                                                                                                                                                                                                                                        | Middle | Last                                                                                    |
| <b>*2. Child's Date of Birth</b> (MM/DD/YYYY)<br>/ /                                                                                                                                                                                                                         |        | <b>*3. Time of Birth</b>                                                                |
|                                                                                                                                                                                                                                                                              |        | <b>*4. Child's Sex</b><br><input type="checkbox"/> Male <input type="checkbox"/> Female |
| 5. Type of Birthplace<br><input type="checkbox"/> Hospital <input type="checkbox"/> Home<br><input type="checkbox"/> Enroute <input type="checkbox"/> Clinic/Doctor's Office<br><input type="checkbox"/> Freestanding Birth Center <input type="checkbox"/> Other (specify): |        | 6. Planned Birth Place, if different (specify):                                         |
| <b>*7. Name of Facility</b> (If not a facility, enter name of place and address)                                                                                                                                                                                             |        | <b>*8. County of Birth</b>                                                              |
|                                                                                                                                                                                                                                                                              |        | <b>*9. City of Birth</b>                                                                |

## Mother's Information

|                                                                                                                                                                                                                                                                                                                                                                                                                                                                                                                                                                                                                                                                                                                                                                                        |                                                         |                                                               |
|----------------------------------------------------------------------------------------------------------------------------------------------------------------------------------------------------------------------------------------------------------------------------------------------------------------------------------------------------------------------------------------------------------------------------------------------------------------------------------------------------------------------------------------------------------------------------------------------------------------------------------------------------------------------------------------------------------------------------------------------------------------------------------------|---------------------------------------------------------|---------------------------------------------------------------|
| <b>10. Mother's Current Legal Name</b>                                                                                                                                                                                                                                                                                                                                                                                                                                                                                                                                                                                                                                                                                                                                                 |                                                         |                                                               |
| First                                                                                                                                                                                                                                                                                                                                                                                                                                                                                                                                                                                                                                                                                                                                                                                  | Middle                                                  | Last                                                          |
| <b>*11. Mother's Name on her Birth Certificate</b>                                                                                                                                                                                                                                                                                                                                                                                                                                                                                                                                                                                                                                                                                                                                     |                                                         |                                                               |
| First                                                                                                                                                                                                                                                                                                                                                                                                                                                                                                                                                                                                                                                                                                                                                                                  | Middle                                                  | Last/Maiden                                                   |
| <b>*12. Date of Birth</b> (MM/DD/YYYY)<br>/ /                                                                                                                                                                                                                                                                                                                                                                                                                                                                                                                                                                                                                                                                                                                                          |                                                         | <b>*13. Birthplace</b> (State, Territory, or Foreign Country) |
|                                                                                                                                                                                                                                                                                                                                                                                                                                                                                                                                                                                                                                                                                                                                                                                        |                                                         | <b>14. Social Security Number</b>                             |
| 15. Do you want to get a Social Security Number for your child? <input type="checkbox"/> Yes <input type="checkbox"/> No                                                                                                                                                                                                                                                                                                                                                                                                                                                                                                                                                                                                                                                               |                                                         |                                                               |
| 16a. Residence: Number and Street (e.g., 624 SE 5 <sup>th</sup> St.)                                                                                                                                                                                                                                                                                                                                                                                                                                                                                                                                                                                                                                                                                                                   |                                                         | Apt No.                                                       |
| 16b. If not U.S.: Country                                                                                                                                                                                                                                                                                                                                                                                                                                                                                                                                                                                                                                                                                                                                                              | 16c. State                                              | 16d. County                                                   |
| 16e. If you live on Tribal Reservation, give name                                                                                                                                                                                                                                                                                                                                                                                                                                                                                                                                                                                                                                                                                                                                      |                                                         | 16f. City or Town                                             |
|                                                                                                                                                                                                                                                                                                                                                                                                                                                                                                                                                                                                                                                                                                                                                                                        |                                                         | 16g. Zip Code + 4                                             |
| 16h. Inside City Limits?<br><input type="checkbox"/> Yes <input type="checkbox"/> No <input type="checkbox"/> Unknown                                                                                                                                                                                                                                                                                                                                                                                                                                                                                                                                                                                                                                                                  | 17. How Long at Current Residence?<br>Years:    Months: | 18. Telephone Number<br>( )                                   |
| 19a. Mailing Address, if different: Number and Street, or PO Box                                                                                                                                                                                                                                                                                                                                                                                                                                                                                                                                                                                                                                                                                                                       |                                                         | Apt No.                                                       |
| 19b. If not U.S.; Country                                                                                                                                                                                                                                                                                                                                                                                                                                                                                                                                                                                                                                                                                                                                                              | 19c. State                                              | 19d. City                                                     |
|                                                                                                                                                                                                                                                                                                                                                                                                                                                                                                                                                                                                                                                                                                                                                                                        |                                                         | 19e. Zip Code + 4                                             |
| 20. Occupation (type of work done during last year)                                                                                                                                                                                                                                                                                                                                                                                                                                                                                                                                                                                                                                                                                                                                    |                                                         | 21. Kind of Business/Industry (do not use company name)       |
| <b>22. Mother's Education</b><br>(Check the box that best describes the highest degree or level of school completed at the time of delivery.)                                                                                                                                                                                                                                                                                                                                                                                                                                                                                                                                                                                                                                          |                                                         |                                                               |
| 1 <input type="checkbox"/> 8 <sup>th</sup> grade or less (specify): _____<br>2 <input type="checkbox"/> 9 <sup>th</sup> - 12 <sup>th</sup> grade; no diploma<br>3 <input type="checkbox"/> High school graduate or GED<br>4 <input type="checkbox"/> Some college credit, but no degree<br>5 <input type="checkbox"/> Associate degree (AA, AS, etc.)<br>6 <input type="checkbox"/> Bachelor's degree (BA, AB, BS, etc.)<br>7 <input type="checkbox"/> Master's degree (MA, MS, MEd, MSW, MBA, etc.)<br>8 <input type="checkbox"/> Doctorate (PhD, EdD, etc.) or professional degree (MD, DDS, DVM, LLB, JD, etc.)                                                                                                                                                                     |                                                         |                                                               |
| <b>23. Mother of Hispanic Origin?</b><br>(Check the box that best describes whether the mother is Spanish/Hispanic/Latina or check "No" box if not Spanish/Hispanic/Latina.)                                                                                                                                                                                                                                                                                                                                                                                                                                                                                                                                                                                                           |                                                         |                                                               |
| 1 <input type="checkbox"/> No, not Spanish/Hispanic/Latina<br>2 <input type="checkbox"/> Yes, Mexican, Mexican American, Chicana<br>3 <input type="checkbox"/> Yes, Puerto Rican<br>4 <input type="checkbox"/> Yes, Cuban<br>5 <input type="checkbox"/> Yes, Other Spanish/Hispanic/Latina (specify): _____                                                                                                                                                                                                                                                                                                                                                                                                                                                                            |                                                         |                                                               |
| <b>24. Mother's Race</b> (check one or more)                                                                                                                                                                                                                                                                                                                                                                                                                                                                                                                                                                                                                                                                                                                                           |                                                         |                                                               |
| 1 <input type="checkbox"/> White<br>2 <input type="checkbox"/> Black or African American<br>3 <input type="checkbox"/> American Indian or Alaska Native<br>(Name of enrolled or principal tribe) _____<br>4 <input type="checkbox"/> Asian Indian    5 <input type="checkbox"/> Chinese<br>6 <input type="checkbox"/> Filipino    7 <input type="checkbox"/> Japanese<br>8 <input type="checkbox"/> Korean    9 <input type="checkbox"/> Vietnamese<br>10 <input type="checkbox"/> Other Asian (specify): _____<br>11 <input type="checkbox"/> Native Hawaiian    12 <input type="checkbox"/> Guamanian or Chamorro<br>13 <input type="checkbox"/> Samoan<br>14 <input type="checkbox"/> Other Pacific Islander (specify): _____<br>15 <input type="checkbox"/> Other (specify): _____ |                                                         |                                                               |

Continue on next page

|                                                                                                                                                                                                                                                                                                                                                                                                                                                                                                                                                                                                                                                                                                                                                                                                    |                                                                                                                                                                                                                                                                                                                                                                                                                                                                                                        |                                                                                                                                                                                                                                                                                                                                                                                                                                                                                                                                                                                                                                                                                                                                                                                                                                                            |
|----------------------------------------------------------------------------------------------------------------------------------------------------------------------------------------------------------------------------------------------------------------------------------------------------------------------------------------------------------------------------------------------------------------------------------------------------------------------------------------------------------------------------------------------------------------------------------------------------------------------------------------------------------------------------------------------------------------------------------------------------------------------------------------------------|--------------------------------------------------------------------------------------------------------------------------------------------------------------------------------------------------------------------------------------------------------------------------------------------------------------------------------------------------------------------------------------------------------------------------------------------------------------------------------------------------------|------------------------------------------------------------------------------------------------------------------------------------------------------------------------------------------------------------------------------------------------------------------------------------------------------------------------------------------------------------------------------------------------------------------------------------------------------------------------------------------------------------------------------------------------------------------------------------------------------------------------------------------------------------------------------------------------------------------------------------------------------------------------------------------------------------------------------------------------------------|
| 25. Mother's Height<br>Feet: _____ Inches: _____                                                                                                                                                                                                                                                                                                                                                                                                                                                                                                                                                                                                                                                                                                                                                   | 26. Mother's Pre-Pregnancy Weight (pounds) _____                                                                                                                                                                                                                                                                                                                                                                                                                                                       | 27. Did Mother get WIC food for herself during pregnancy?<br><input type="checkbox"/> Yes <input type="checkbox"/> No                                                                                                                                                                                                                                                                                                                                                                                                                                                                                                                                                                                                                                                                                                                                      |
| 28. Cigarette Smoking Before and During Pregnancy<br><input type="checkbox"/> Yes <input type="checkbox"/> No                                                                                                                                                                                                                                                                                                                                                                                                                                                                                                                                                                                                                                                                                      |                                                                                                                                                                                                                                                                                                                                                                                                                                                                                                        | Average number of cigarettes or packs per day:<br># of cigarettes _____ # of packs _____<br>Three months before pregnancy _____ or _____<br>First three months of pregnancy _____ or _____<br>Second three months of pregnancy _____ or _____<br>Last three months of pregnancy _____ or _____                                                                                                                                                                                                                                                                                                                                                                                                                                                                                                                                                             |
| <b>Mother's Marital Status</b>                                                                                                                                                                                                                                                                                                                                                                                                                                                                                                                                                                                                                                                                                                                                                                     |                                                                                                                                                                                                                                                                                                                                                                                                                                                                                                        |                                                                                                                                                                                                                                                                                                                                                                                                                                                                                                                                                                                                                                                                                                                                                                                                                                                            |
| 29. Is mother married? (Check only one box)                                                                                                                                                                                                                                                                                                                                                                                                                                                                                                                                                                                                                                                                                                                                                        |                                                                                                                                                                                                                                                                                                                                                                                                                                                                                                        |                                                                                                                                                                                                                                                                                                                                                                                                                                                                                                                                                                                                                                                                                                                                                                                                                                                            |
| <b>Important - Read before responding to marital status question:</b><br>If you were married at any time during your pregnancy, your spouse or partner is considered the other legal parent unless he or she completes a denial of paternity and another man acknowledges that he is the father (chapter 26.26 RCW). To add someone other than your spouse or partner to the birth certificate, an acknowledgment and denial of paternity needs to be completed by all parties (DOH form 422-032). Under Washington State law, a state-registered domestic partnership is considered the same as a marriage (chapter 26.60 RCW).<br><br>If you were not married at any time during the pregnancy, an acknowledgment of paternity needs to be completed to add the father to the birth certificate. |                                                                                                                                                                                                                                                                                                                                                                                                                                                                                                        |                                                                                                                                                                                                                                                                                                                                                                                                                                                                                                                                                                                                                                                                                                                                                                                                                                                            |
| <b>Married - Yes</b>                                                                                                                                                                                                                                                                                                                                                                                                                                                                                                                                                                                                                                                                                                                                                                               |                                                                                                                                                                                                                                                                                                                                                                                                                                                                                                        | <b>Married - No</b>                                                                                                                                                                                                                                                                                                                                                                                                                                                                                                                                                                                                                                                                                                                                                                                                                                        |
| 29a. <input type="checkbox"/> Yes, I am married to the other parent identified in box #30.                                                                                                                                                                                                                                                                                                                                                                                                                                                                                                                                                                                                                                                                                                         | 29d. <input type="checkbox"/> No, I am not married and I am providing information about the father in box #30.<br><br>Ask hospital staff for a Paternity Acknowledgment form (#DOH 422-032). If you were married any time during the pregnancy and your previous spouse is not the parent identified in box #30, the spouse's Denial of Paternity must also be completed.                                                                                                                              |                                                                                                                                                                                                                                                                                                                                                                                                                                                                                                                                                                                                                                                                                                                                                                                                                                                            |
| 29b. <input type="checkbox"/> Yes, I am married but not to the other person identified in box #30.<br><br>Ask hospital staff for a Paternity Acknowledgment form (# DOH 422-032). You must complete this form, including the spouse's Denial of Paternity.                                                                                                                                                                                                                                                                                                                                                                                                                                                                                                                                         | 29e. <input type="checkbox"/> No, I am not married now, but I was married to the other parent identified in box #30 at some time during this pregnancy.                                                                                                                                                                                                                                                                                                                                                |                                                                                                                                                                                                                                                                                                                                                                                                                                                                                                                                                                                                                                                                                                                                                                                                                                                            |
| 29c. <input type="checkbox"/> Yes, I am married but I refuse to provide the spouse or partner's information.<br><br>If this box is checked, the other parent will be listed on the birth certificate as "None Named".                                                                                                                                                                                                                                                                                                                                                                                                                                                                                                                                                                              | 29f. <input type="checkbox"/> No, I am not married and I refuse to provide the father's information.<br><br>If this box is checked, the other parent will be listed on the birth certificate as "None Named".                                                                                                                                                                                                                                                                                          |                                                                                                                                                                                                                                                                                                                                                                                                                                                                                                                                                                                                                                                                                                                                                                                                                                                            |
| <b>Father/ Parent's Information</b>                                                                                                                                                                                                                                                                                                                                                                                                                                                                                                                                                                                                                                                                                                                                                                |                                                                                                                                                                                                                                                                                                                                                                                                                                                                                                        |                                                                                                                                                                                                                                                                                                                                                                                                                                                                                                                                                                                                                                                                                                                                                                                                                                                            |
| *30. Current Legal Name<br>First _____ Middle _____ Last _____                                                                                                                                                                                                                                                                                                                                                                                                                                                                                                                                                                                                                                                                                                                                     |                                                                                                                                                                                                                                                                                                                                                                                                                                                                                                        |                                                                                                                                                                                                                                                                                                                                                                                                                                                                                                                                                                                                                                                                                                                                                                                                                                                            |
| *31. Date of Birth (MM/DD/YYYY)<br>____ / ____ / ____                                                                                                                                                                                                                                                                                                                                                                                                                                                                                                                                                                                                                                                                                                                                              | *32. Birthplace (State, Territory, or Foreign Country) _____                                                                                                                                                                                                                                                                                                                                                                                                                                           | 33. Social Security Number _____                                                                                                                                                                                                                                                                                                                                                                                                                                                                                                                                                                                                                                                                                                                                                                                                                           |
| 34. Occupation (type of work done during last year.) _____                                                                                                                                                                                                                                                                                                                                                                                                                                                                                                                                                                                                                                                                                                                                         |                                                                                                                                                                                                                                                                                                                                                                                                                                                                                                        | 35. Kind of Business/Industry (do not use Company Name) _____                                                                                                                                                                                                                                                                                                                                                                                                                                                                                                                                                                                                                                                                                                                                                                                              |
| 36. Father/Parent Education<br>(Check the box that best describes the highest degree or level of school completed at the time of delivery.)<br><br>1 <input type="checkbox"/> 8 <sup>th</sup> grade or less (specify): _____<br>2 <input type="checkbox"/> 9 <sup>th</sup> - 12 <sup>th</sup> grade; no diploma<br>3 <input type="checkbox"/> High school graduate or GED<br>4 <input type="checkbox"/> Some college credit, but no degree<br>5 <input type="checkbox"/> Associate degree (AA, AS, etc.)<br>6 <input type="checkbox"/> Bachelor's degree (BA, AB, BS, etc.)<br>7 <input type="checkbox"/> Master's degree (MA, MS, MEd, MSW, MBA, etc.)<br>8 <input type="checkbox"/> Doctorate (PhD, EdD, etc.) or professional degree (MD, DDS, DVM, LLB, JD, etc.)                              | 37. Father/Parent of Hispanic Origin?<br>(Check the box that best describes whether the father/parent is Spanish/Hispanic/Latino or check "No" box if not Spanish/Hispanic/Latino.)<br><br>1 <input type="checkbox"/> No, not Spanish/Hispanic/Latino<br>2 <input type="checkbox"/> Yes, Mexican, Mexican American, Chicano<br>3 <input type="checkbox"/> Yes, Puerto Rican<br>4 <input type="checkbox"/> Yes, Cuban<br>5 <input type="checkbox"/> Yes, other Spanish/Hispanic/Latino (specify): _____ | 38. Father/Parent Race (check one or more)<br><br>1 <input type="checkbox"/> White<br>2 <input type="checkbox"/> Black or African American<br>3 <input type="checkbox"/> American Indian or Alaska Native<br>(Name of enrolled or principal tribe) _____<br>4 <input type="checkbox"/> Asian Indian      5 <input type="checkbox"/> Chinese<br>6 <input type="checkbox"/> Filipino          7 <input type="checkbox"/> Japanese<br>8 <input type="checkbox"/> Korean              9 <input type="checkbox"/> Vietnamese<br>10 <input type="checkbox"/> Other Asian (specify): _____<br>11 <input type="checkbox"/> Native Hawaiian    12 <input type="checkbox"/> Guamanian or Chamorro<br>13 <input type="checkbox"/> Samoan<br>14 <input type="checkbox"/> Other Pacific Islander (specify): _____<br>15 <input type="checkbox"/> Other (specify): _____ |

| For Hospital Use Only                                                                                                                                                                                                                                                                                                                                                                                                                                                                                                                                                                                                                                                                                                                                                                                                                                                                                                                                                                                                                                                                                                                                                                                                                                                                                                                  |                                                                                                                                                                                                                                                                                                                                                                                                                                                                                                                                                                                                                                  |                                                                                                                                                                                                                                                                                                                                                                                                                                                                                                                                                                                                                                                                                                                                                                                                                                                                                                                                                                                                    |
|----------------------------------------------------------------------------------------------------------------------------------------------------------------------------------------------------------------------------------------------------------------------------------------------------------------------------------------------------------------------------------------------------------------------------------------------------------------------------------------------------------------------------------------------------------------------------------------------------------------------------------------------------------------------------------------------------------------------------------------------------------------------------------------------------------------------------------------------------------------------------------------------------------------------------------------------------------------------------------------------------------------------------------------------------------------------------------------------------------------------------------------------------------------------------------------------------------------------------------------------------------------------------------------------------------------------------------------|----------------------------------------------------------------------------------------------------------------------------------------------------------------------------------------------------------------------------------------------------------------------------------------------------------------------------------------------------------------------------------------------------------------------------------------------------------------------------------------------------------------------------------------------------------------------------------------------------------------------------------|----------------------------------------------------------------------------------------------------------------------------------------------------------------------------------------------------------------------------------------------------------------------------------------------------------------------------------------------------------------------------------------------------------------------------------------------------------------------------------------------------------------------------------------------------------------------------------------------------------------------------------------------------------------------------------------------------------------------------------------------------------------------------------------------------------------------------------------------------------------------------------------------------------------------------------------------------------------------------------------------------|
| Mother's Statistical Information                                                                                                                                                                                                                                                                                                                                                                                                                                                                                                                                                                                                                                                                                                                                                                                                                                                                                                                                                                                                                                                                                                                                                                                                                                                                                                       |                                                                                                                                                                                                                                                                                                                                                                                                                                                                                                                                                                                                                                  |                                                                                                                                                                                                                                                                                                                                                                                                                                                                                                                                                                                                                                                                                                                                                                                                                                                                                                                                                                                                    |
| 1 39. Date of <u>First</u> Prenatal Care Visit (MM/DD/YYYY)<br>/ / <input type="checkbox"/> No Prenatal Care                                                                                                                                                                                                                                                                                                                                                                                                                                                                                                                                                                                                                                                                                                                                                                                                                                                                                                                                                                                                                                                                                                                                                                                                                           | 40. Date of <u>Last</u> Prenatal Care Visit (MM/DD/YYYY)<br>/ /                                                                                                                                                                                                                                                                                                                                                                                                                                                                                                                                                                  | 41. Total Number of Prenatal Visits for this Pregnancy<br>(If none, enter '0')                                                                                                                                                                                                                                                                                                                                                                                                                                                                                                                                                                                                                                                                                                                                                                                                                                                                                                                     |
| 2 42. Number of Previous Live Births (Do not include this child)<br>Number Now Living <input type="checkbox"/> None<br>Number Now Dead <input type="checkbox"/> None                                                                                                                                                                                                                                                                                                                                                                                                                                                                                                                                                                                                                                                                                                                                                                                                                                                                                                                                                                                                                                                                                                                                                                   | 43. Date of Last Live Birth (MM/YYYY) (Do not include<br>this child)<br>/ /                                                                                                                                                                                                                                                                                                                                                                                                                                                                                                                                                      | 44. Number of Other Pregnancy Outcomes<br>(Spontaneous or induced losses or ectopic pregnancies)<br>Number of Other Outcomes <input type="checkbox"/> None                                                                                                                                                                                                                                                                                                                                                                                                                                                                                                                                                                                                                                                                                                                                                                                                                                         |
| 4 45. Date of Last Other Pregnancy Outcome (MM/YYYY)<br>/ /                                                                                                                                                                                                                                                                                                                                                                                                                                                                                                                                                                                                                                                                                                                                                                                                                                                                                                                                                                                                                                                                                                                                                                                                                                                                            | 46. Date Last Normal Menses Began (MM/DD/YYYY)<br>/ /                                                                                                                                                                                                                                                                                                                                                                                                                                                                                                                                                                            | 47. Mother's Weight at Delivery(pounds)                                                                                                                                                                                                                                                                                                                                                                                                                                                                                                                                                                                                                                                                                                                                                                                                                                                                                                                                                            |
| 6 48. Was mother transferred to higher level care for maternal medical or fetal indications for delivery? <input type="checkbox"/> Yes <input type="checkbox"/> No<br>If yes, name of facility mother was transferred from:                                                                                                                                                                                                                                                                                                                                                                                                                                                                                                                                                                                                                                                                                                                                                                                                                                                                                                                                                                                                                                                                                                            | 49. Principal Source of Payment for this Delivery<br><input type="checkbox"/> Medicaid <input type="checkbox"/> Self-Pay <input type="checkbox"/> Private Insurance<br><input type="checkbox"/> Other Gov't <input type="checkbox"/> Tricare <input type="checkbox"/> Indian Health<br><input type="checkbox"/> Charity Care <input type="checkbox"/> Other _____                                                                                                                                                                                                                                                                |                                                                                                                                                                                                                                                                                                                                                                                                                                                                                                                                                                                                                                                                                                                                                                                                                                                                                                                                                                                                    |
| Child's Statistical Information                                                                                                                                                                                                                                                                                                                                                                                                                                                                                                                                                                                                                                                                                                                                                                                                                                                                                                                                                                                                                                                                                                                                                                                                                                                                                                        |                                                                                                                                                                                                                                                                                                                                                                                                                                                                                                                                                                                                                                  |                                                                                                                                                                                                                                                                                                                                                                                                                                                                                                                                                                                                                                                                                                                                                                                                                                                                                                                                                                                                    |
| 10 50. Birth Weight<br>lbs: ozs: or grams:                                                                                                                                                                                                                                                                                                                                                                                                                                                                                                                                                                                                                                                                                                                                                                                                                                                                                                                                                                                                                                                                                                                                                                                                                                                                                             | 51. Infant Head Circumference (cm)                                                                                                                                                                                                                                                                                                                                                                                                                                                                                                                                                                                               | 52. Obstetric Estimate of Gestation (completed weeks)                                                                                                                                                                                                                                                                                                                                                                                                                                                                                                                                                                                                                                                                                                                                                                                                                                                                                                                                              |
| 11 53. Apgar score at 5 minutes _____ If score is less than 6, score at 10 minutes _____                                                                                                                                                                                                                                                                                                                                                                                                                                                                                                                                                                                                                                                                                                                                                                                                                                                                                                                                                                                                                                                                                                                                                                                                                                               |                                                                                                                                                                                                                                                                                                                                                                                                                                                                                                                                                                                                                                  |                                                                                                                                                                                                                                                                                                                                                                                                                                                                                                                                                                                                                                                                                                                                                                                                                                                                                                                                                                                                    |
| 12 54. Plurality: <input type="checkbox"/> Single <input type="checkbox"/> twins <input type="checkbox"/> triplets <input type="checkbox"/> other _____                                                                                                                                                                                                                                                                                                                                                                                                                                                                                                                                                                                                                                                                                                                                                                                                                                                                                                                                                                                                                                                                                                                                                                                |                                                                                                                                                                                                                                                                                                                                                                                                                                                                                                                                                                                                                                  | 55. If not single birth; birth order: <input type="checkbox"/> first <input type="checkbox"/> second <input type="checkbox"/> third <input type="checkbox"/> other _____                                                                                                                                                                                                                                                                                                                                                                                                                                                                                                                                                                                                                                                                                                                                                                                                                           |
| 13 56. Was infant transferred within 24 hours of delivery? <input type="checkbox"/> Yes <input type="checkbox"/> No<br>If yes, name of facility infant was transferred to:                                                                                                                                                                                                                                                                                                                                                                                                                                                                                                                                                                                                                                                                                                                                                                                                                                                                                                                                                                                                                                                                                                                                                             | 57. Is infant living at the time of report?<br><input type="checkbox"/> Yes <input type="checkbox"/> No <input type="checkbox"/> Transferred, status unknown                                                                                                                                                                                                                                                                                                                                                                                                                                                                     | 58. Is infant being breastfed?<br><input type="checkbox"/> Yes <input type="checkbox"/> No                                                                                                                                                                                                                                                                                                                                                                                                                                                                                                                                                                                                                                                                                                                                                                                                                                                                                                         |
| Medical and Health Information                                                                                                                                                                                                                                                                                                                                                                                                                                                                                                                                                                                                                                                                                                                                                                                                                                                                                                                                                                                                                                                                                                                                                                                                                                                                                                         |                                                                                                                                                                                                                                                                                                                                                                                                                                                                                                                                                                                                                                  |                                                                                                                                                                                                                                                                                                                                                                                                                                                                                                                                                                                                                                                                                                                                                                                                                                                                                                                                                                                                    |
| 15 59. Risk Factors in this Pregnancy (check all that apply):<br>1 Diabetes<br><input type="checkbox"/> Prepregnancy (Diagnosis prior to this pregnancy)<br><input type="checkbox"/> Gestational (Diagnosis in this pregnancy)<br>2 Hypertension<br><input type="checkbox"/> Prepregnancy (Chronic)<br><input type="checkbox"/> Gestational (PIH, preeclampsia)<br><input type="checkbox"/> Eclampsia<br>3 <input type="checkbox"/> Previous preterm births<br>4 <input type="checkbox"/> Other previous poor pregnancy outcome (includes<br>perinatal death, small-for-gestational age/intrauterine<br>growth restricted birth)<br>5 <input type="checkbox"/> Vaginal bleeding during this pregnancy prior to<br>the onset of labor<br>6 <input type="checkbox"/> Pregnancy resulted from infertility treatment -<br>If yes-check all that apply:<br><input type="checkbox"/> Fertility-enhancing drugs, artificial insemination<br>or intrauterine insemination<br><input type="checkbox"/> Assisted reproductive technology [e.g., in vitro<br>fertilization (IVF), gamete intrafallopian<br>transfer (GIFT)]<br>7 <input type="checkbox"/> Mother had a previous cesarean delivery?<br>If Yes, how many _____<br>8 <input type="checkbox"/> Group B Streptococcus culture positive<br>9 <input type="checkbox"/> None of the above | 60. Infections Present and/or Treated During this<br>Pregnancy (check all that apply):<br>1 <input type="checkbox"/> Gonorrhea<br>2 <input type="checkbox"/> Syphilis<br>3 <input type="checkbox"/> Herpes Simplex Virus (HSV)<br>4 <input type="checkbox"/> Chlamydia<br>5 <input type="checkbox"/> Hepatitis B<br>6 <input type="checkbox"/> Hepatitis C<br>7 <input type="checkbox"/> HIV Infection<br>8 <input type="checkbox"/> Other _____<br>Specify: _____<br>9 <input type="checkbox"/> None of the above                                                                                                               | 61. Maternal Morbidity (complications associated with labor<br>and delivery) (Check all that apply):<br>1 <input type="checkbox"/> Maternal transfusion<br>2 <input type="checkbox"/> Third or fourth degree perineal laceration<br>3 <input type="checkbox"/> Ruptured uterus<br>4 <input type="checkbox"/> Unplanned hysterectomy<br>5 <input type="checkbox"/> Admission to intensive care unit<br>6 <input type="checkbox"/> Unplanned operating room procedure following<br>delivery<br>7 <input type="checkbox"/> None of the above                                                                                                                                                                                                                                                                                                                                                                                                                                                          |
| 33 62. Method of Delivery<br>A. Was delivery with forceps attempted but unsuccessful?<br><input type="checkbox"/> Yes <input type="checkbox"/> No<br>B. Was delivery with vacuum extraction attempted but<br>unsuccessful?<br><input type="checkbox"/> Yes <input type="checkbox"/> No<br>C. Fetal presentation at birth<br><input type="checkbox"/> Cephalic <input type="checkbox"/> Breech <input type="checkbox"/> Other<br>D. Final route and method of delivery (Check One)<br>Vaginal: <input type="checkbox"/> Spontaneous <input type="checkbox"/> Forceps <input type="checkbox"/> Vacuum<br>OR<br>42 Cesarean: <input type="checkbox"/><br>If cesarean, was a trial of labor attempted?<br><input type="checkbox"/> Yes <input type="checkbox"/> No                                                                                                                                                                                                                                                                                                                                                                                                                                                                                                                                                                         | 63. Obstetric procedures (Check all that apply):<br>1 <input type="checkbox"/> Cervical cerclage<br>2 <input type="checkbox"/> Tocolysis<br>3 <input type="checkbox"/> External cephalic version:<br><input type="checkbox"/> Successful<br><input type="checkbox"/> Failed<br>4 <input type="checkbox"/> None of the above<br>64. Onset of Labor (Check all that apply):<br>1 <input type="checkbox"/> Premature rupture of the membranes<br>(Prolonged, ≥ 12hr)<br>2 <input type="checkbox"/> Precipitous Labor (< 3hr)<br>3 <input type="checkbox"/> Prolonged Labor (≥ 20hr)<br>4 <input type="checkbox"/> None of the above | 65. Characteristics of Labor and Delivery (Check all that apply):<br>1 <input type="checkbox"/> Induction of labor<br>2 <input type="checkbox"/> Augmentation of labor<br>3 <input type="checkbox"/> Non-vertex presentation<br>4 <input type="checkbox"/> Epidural or spinal anesthesia during labor<br>5 <input type="checkbox"/> Steroids (glucocorticoids) for fetal lung maturation<br>received by the mother prior to delivery<br>6 <input type="checkbox"/> Antibiotics received by the mother during labor<br>7 <input type="checkbox"/> Clinical chorioamnionitis diagnosed during labor or<br>maternal temperature ≥38°C (100.4°F)<br>8 <input type="checkbox"/> Moderate/heavy meconium staining of the amniotic<br>fluid<br>9 <input type="checkbox"/> Fetal intolerance of labor such that one or more of the<br>following actions was taken: in-utero resuscitation<br>measures, further fetal assessment, or operative<br>delivery<br>10 <input type="checkbox"/> None of the above |
| 45 66. Abnormal Conditions of the Newborn<br>(Occurring within 24 hours of delivery) (check all that apply):<br>1 <input type="checkbox"/> Assisted ventilation required immediately following<br>delivery<br>2 <input type="checkbox"/> Assisted ventilation required for more than six hours<br>3 <input type="checkbox"/> NICU admission<br>4 <input type="checkbox"/> Newborn given surfactant replacement therapy<br>5 <input type="checkbox"/> Antibiotics received by the newborn for<br>suspected neonatal sepsis<br>6 <input type="checkbox"/> Seizure or serious neurologic dysfunction<br>7 <input type="checkbox"/> Significant birth injury (skeletal fracture(s),<br>peripheral nerve injury, soft tissue or solid organ<br>hemorrhage which requires intervention)<br>8 <input type="checkbox"/> None of the above                                                                                                                                                                                                                                                                                                                                                                                                                                                                                                      | 67. Congenital Anomalies of the Newborn<br>(Observed within 24 hours of delivery) (Check all that apply)<br>1 <input type="checkbox"/> Anencephaly<br>2 <input type="checkbox"/> Meningocele / Spina bifida<br>3 <input type="checkbox"/> Cyanotic congenital heart disease<br>4 <input type="checkbox"/> Congenital diaphragmatic hernia<br>5 <input type="checkbox"/> Omphalocele<br>6 <input type="checkbox"/> Gastroschisis<br>7 <input type="checkbox"/> Limb reduction defect (excluding congenital<br>amputation and dwarfing syndrome)                                                                                   | 8 <input type="checkbox"/> Cleft Lip with or without Cleft Palate<br>9 <input type="checkbox"/> Cleft Palate alone<br>10 Down Syndrome<br><input type="checkbox"/> Karyotype confirmed<br><input type="checkbox"/> Karyotype pending<br>11 Chromosomal disorder<br><input type="checkbox"/> Karyotype confirmed<br><input type="checkbox"/> Suspected, Karyotype pending<br>12 <input type="checkbox"/> Hypospadias<br>13 <input type="checkbox"/> None of the above                                                                                                                                                                                                                                                                                                                                                                                                                                                                                                                               |
| Attendant and Certifier Information                                                                                                                                                                                                                                                                                                                                                                                                                                                                                                                                                                                                                                                                                                                                                                                                                                                                                                                                                                                                                                                                                                                                                                                                                                                                                                    |                                                                                                                                                                                                                                                                                                                                                                                                                                                                                                                                                                                                                                  |                                                                                                                                                                                                                                                                                                                                                                                                                                                                                                                                                                                                                                                                                                                                                                                                                                                                                                                                                                                                    |
| 68. Certifier – Name and Title                                                                                                                                                                                                                                                                                                                                                                                                                                                                                                                                                                                                                                                                                                                                                                                                                                                                                                                                                                                                                                                                                                                                                                                                                                                                                                         |                                                                                                                                                                                                                                                                                                                                                                                                                                                                                                                                                                                                                                  | 69. Date Certified (MM/DD/YYYY)<br>/ /                                                                                                                                                                                                                                                                                                                                                                                                                                                                                                                                                                                                                                                                                                                                                                                                                                                                                                                                                             |
| 70. Attendant – Name and Title (If other than Certifier)                                                                                                                                                                                                                                                                                                                                                                                                                                                                                                                                                                                                                                                                                                                                                                                                                                                                                                                                                                                                                                                                                                                                                                                                                                                                               |                                                                                                                                                                                                                                                                                                                                                                                                                                                                                                                                                                                                                                  | 71. NPI of person delivering the baby:                                                                                                                                                                                                                                                                                                                                                                                                                                                                                                                                                                                                                                                                                                                                                                                                                                                                                                                                                             |

**Appendix Table 1.** Severe neonatal morbidity components and ICD-9-CM codes.

| Neonatal morbidity                                                                                                                                                                                                                                                                                                                                                                                                                                                                                                                                    | ICD-9-CM code            |
|-------------------------------------------------------------------------------------------------------------------------------------------------------------------------------------------------------------------------------------------------------------------------------------------------------------------------------------------------------------------------------------------------------------------------------------------------------------------------------------------------------------------------------------------------------|--------------------------|
| <b>Bronchopulmonary dysplasia</b>                                                                                                                                                                                                                                                                                                                                                                                                                                                                                                                     | 770.7                    |
| <b>Intraventricular hemorrhage</b><br>Grade III – bleeding with enlargement of ventricle<br>Grade IV – bleeding into cerebral cortex                                                                                                                                                                                                                                                                                                                                                                                                                  | 772.13<br>772.14         |
| <b>Periventricular leukomalacia</b>                                                                                                                                                                                                                                                                                                                                                                                                                                                                                                                   | 779.7                    |
| <b>Retinopathy of prematurity</b>                                                                                                                                                                                                                                                                                                                                                                                                                                                                                                                     | 362.2                    |
| <b>Necrotizing enterocolitis</b>                                                                                                                                                                                                                                                                                                                                                                                                                                                                                                                      | 777.5                    |
| <b>Sepsis</b><br>Septicemia of newborn                                                                                                                                                                                                                                                                                                                                                                                                                                                                                                                | 771.81                   |
| <b>Convulsions</b><br>Fits in newborn; seizures in newborn                                                                                                                                                                                                                                                                                                                                                                                                                                                                                            | 779.0                    |
| <b>Severe birth trauma</b><br>Subdural and cerebral hemorrhage (whether described as due to birth trauma or to intrapartum anoxia or hypoxia; subdural hematoma (localized); tentorial tear<br>Epicranial subaponeurotic hemorrhage (massive); subgaleal hemorrhage<br>Injury to spine and spinal cord including:<br>Dislocation of spine or spinal cord due to birth trauma<br>Fracture of spine or spinal cord due to birth trauma<br>Laceration of spine or spinal cord due to birth trauma<br>Rupture of spine or spinal cord due to birth trauma | 767.0<br>767.11<br>767.4 |

**Appendix Figure 1.** Study population flow chart, Washington State, U.S.A., 2004-2013.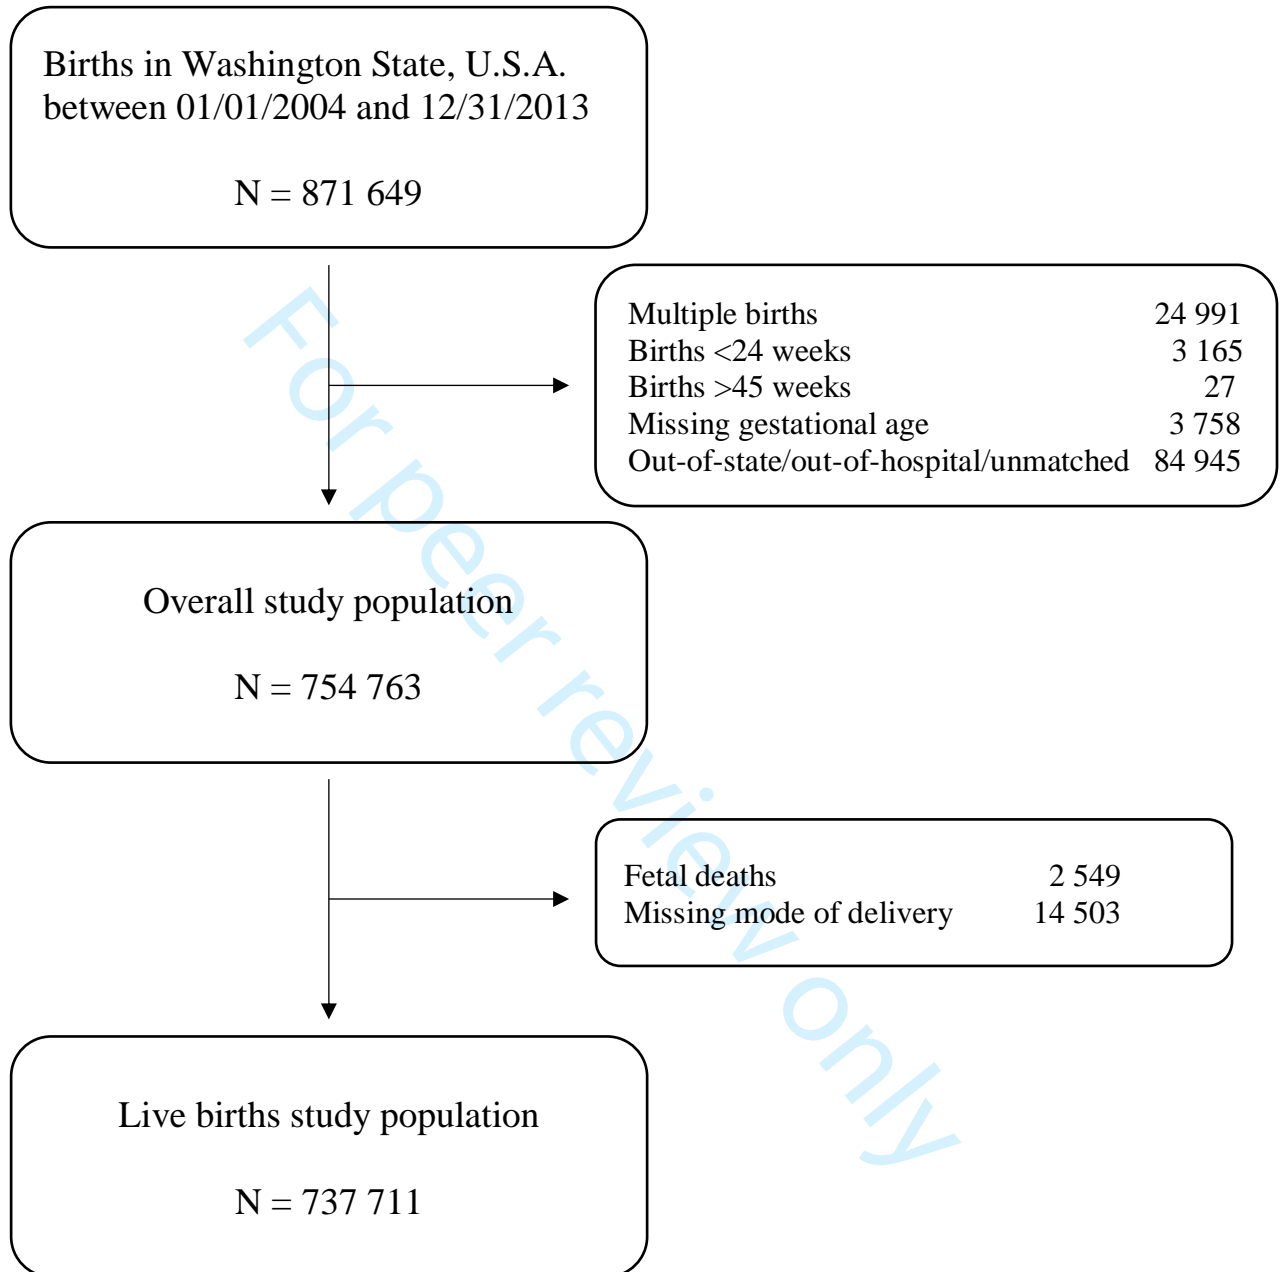

**Appendix Figure 2.** Gestational age-specific rates of stillbirths calculated using the fetuses-at-risk (FAR) approach, Washington State, U.S.A., 2004-2013.

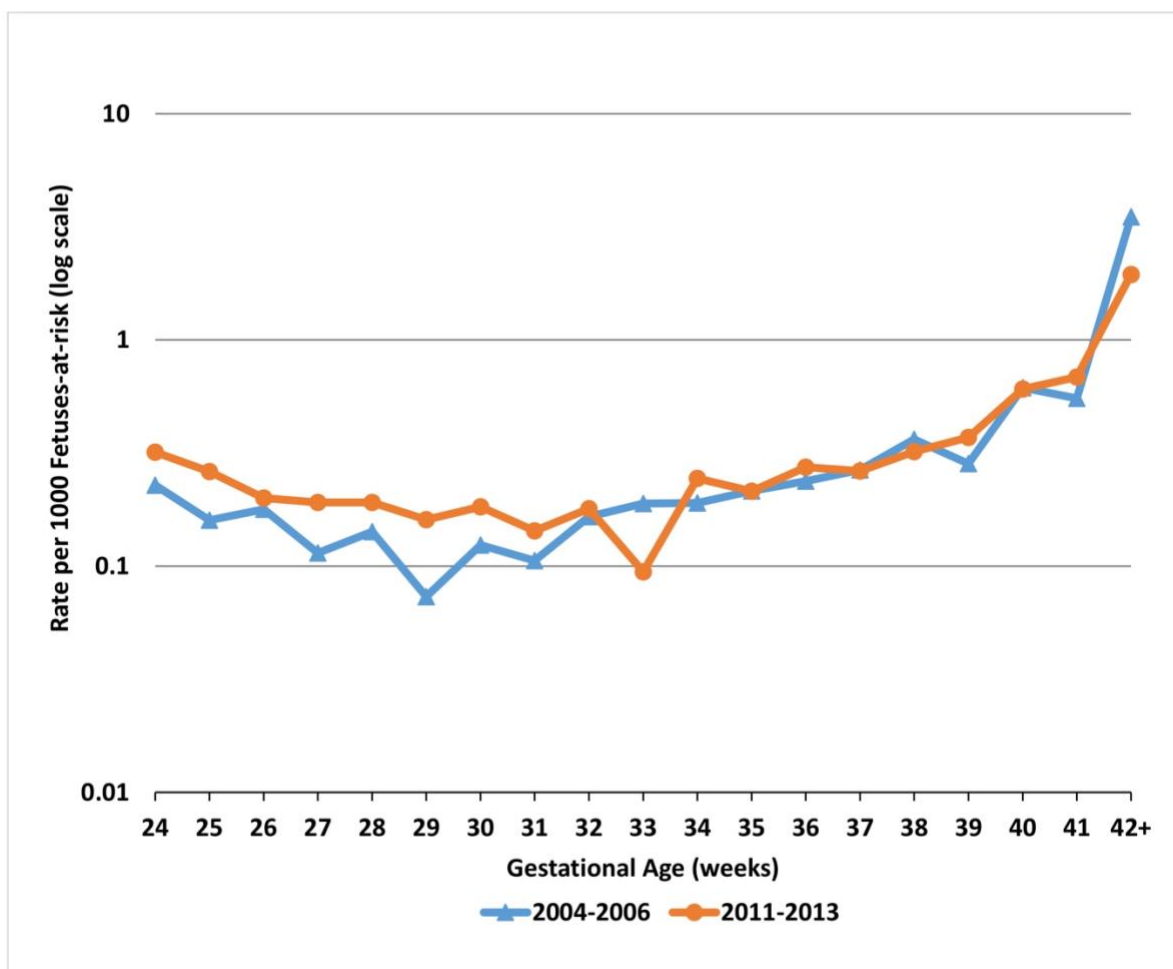



**Appendix Table 2.** Preterm live births by gestational age categories and clinical subtype, Washington State, U.S.A., 2004-2013.

| <b>Gestational age and clinical preterm birth subtype</b> | <b>All Years (2004-2013)</b> | <b>Period 1 (2004-2006)</b> | <b>Period 2 (2011-2013)</b> | <b>p-value* (Period 2 vs. Period 1)</b> |
|-----------------------------------------------------------|------------------------------|-----------------------------|-----------------------------|-----------------------------------------|
| 24-27 weeks                                               | 1 833                        | 489                         | 598                         | <0.001                                  |
| PPROM                                                     | 509 (27.8)                   | 181 (37.0)                  | 130 (21.7)                  |                                         |
| Spontaneous labor                                         | 532 (29.0)                   | 135 (27.6)                  | 189 (31.6)                  |                                         |
| Iatrogenic                                                | 792 (43.2)                   | 173 (35.4)                  | 279 (46.7)                  |                                         |
| 28-31                                                     | 4 095                        | 1 135                       | 1 357                       | <0.001                                  |
| PPROM                                                     | 909 (22.2)                   | 295 (26.0)                  | 264 (19.5)                  |                                         |
| Spontaneous labor                                         | 1 255 (30.6)                 | 357 (31.5)                  | 416 (30.7)                  |                                         |
| Iatrogenic                                                | 1 931 (47.2)                 | 483 (42.6)                  | 677 (49.9)                  |                                         |
| 32-33                                                     | 5 664                        | 1 469                       | 1 848                       | 0.006                                   |
| PPROM                                                     | 1 288 (22.7)                 | 383 (26.1)                  | 410 (22.2)                  |                                         |
| Spontaneous labor                                         | 1 988 (35.1)                 | 530 (36.1)                  | 649 (35.1)                  |                                         |
| Iatrogenic                                                | 2 388 (42.2)                 | 556 (37.8)                  | 789 (42.7)                  |                                         |
| 34-36                                                     | 40 422                       | 12 249                      | 11 821                      | 0.001                                   |
| PPROM                                                     | 5 809 (14.4)                 | 1 912 (15.6)                | 1 673 (14.2)                |                                         |
| Spontaneous labor                                         | 18 973 (46.9)                | 5 770 (47.1)                | 5 530 (46.8)                |                                         |
| Iatrogenic                                                | 15 640 (38.7)                | 4 567 (37.3)                | 4 618 (39.1)                |                                         |
| All (24-36)                                               | 52 014                       | 15 342                      | 15 624                      | <0.001                                  |
| PPROM                                                     | 8 515 (16.4)                 | 2 771 (18.1)                | 2 477 (15.9)                |                                         |
| Spontaneous labor                                         | 22 748 (43.7)                | 6 792 (44.3)                | 6 784 (43.4)                |                                         |
| Iatrogenic                                                | 20 751 (39.9)                | 5 779 (37.7)                | 6 363 (40.7)                |                                         |

PPROM, preterm premature rupture of membranes

\* p-value for Chi-square test comparing Period 1 and 2

**Appendix Table 3** Gestational age-specific rates of adverse neonatal outcomes among singleton preterm infants, Washington State, U.S.A., 2004-2013.

| Outcome and gestational age category | Rates per 100 live births |              |                          |
|--------------------------------------|---------------------------|--------------|--------------------------|
|                                      | N (Rate)                  |              | Rate difference (95% CI) |
|                                      | 2004-2006                 | 2011-2013    |                          |
| Neonatal death                       |                           |              |                          |
| 24-27 weeks                          | 76 (15.5)                 | 85 (14.2)    | -1.33 (-5.59, 2.93)      |
| 28-31                                | 55 (4.9)                  | 40 (3.0)     | -1.90 (-3.44, -0.36)     |
| 32-33                                | 23 (1.6)                  | 18 (1.0)     | -0.59 (-1.37, 0.19)      |
| 34-36                                | 43 (0.4)                  | 64 (0.5)     | +0.19 (0.02, 0.36)       |
| All (24-36)                          | 197 (1.3)                 | 207 (1.3)    | +0.04 (-0.21, 0.29)      |
| Neonatal death/<br>severe morbidity  |                           |              |                          |
| 24-27 weeks                          | 353 (72.2)                | 429 (71.7)   | -0.45 (-5.82, 4.92)      |
| 28-31                                | 383 (33.7)                | 496 (36.6)   | +2.81 (-0.95, 6.57)      |
| 32-33                                | 166 (11.3)                | 302 (16.3)   | +5.04 (2.70, 7.38)       |
| 34-36                                | 307 (2.5)                 | 639 (5.4)    | +2.90 (2.41, 3.39)       |
| All (24-36)                          | 1 209 (7.9)               | 1 866 (11.9) | +4.06 (3.40, 4.73)       |

CI, confidence interval; severe morbidity includes BPD, IVH grade $\geq$ 3, PVL, ROP, NEC, neonatal sepsis, convulsions of newborn, and severe birth trauma.

1  
2  
3  
4  
5  
6  
7  
8  
9  
10  
11  
12  
13  
14  
15  
16  
17  
18  
19  
20  
21  
22  
23  
24  
25  
26  
27  
28  
29  
30  
31  
32  
33  
34  
35  
36  
37  
38  
39  
40  
41  
42  
43  
44  
45  
46  
47  
48  
49  
50  
51  
52  
53  
54  
55  
56  
57  
58  
59  
60

**Appendix Table 4.** Temporal trends in gestational-specific rates of severe neonatal morbidity components, Washington State, U.S.A., 2004-2013.

For peer review only

| Neonatal Morbidity            | Rates of Outcome by Period<br>[N (per 100 live births)] |             | Adjusted Odds<br>Ratio†<br>(95% CI) |
|-------------------------------|---------------------------------------------------------|-------------|-------------------------------------|
|                               | 2004-2006                                               | 2011-2013   |                                     |
| <b>All PTB (24-36 weeks)</b>  |                                                         |             |                                     |
| BPD                           | 306 (2.0)                                               | 269 (1.7)   | <b>0.95 (0.93-0.98)</b>             |
| IVH (grade $\geq 3$ )         | 72 (0.5)                                                | 61 (0.4)    | <b>0.95 (0.90-1.00)</b>             |
| PVL                           | 13 (0.1)                                                | 27 (0.2)    | 1.10 (1.00-1.22)                    |
| ROP                           | 60 (0.4)                                                | 86 (0.6)    | 1.02 (0.98-1.07)                    |
| NEC                           | 129 (0.8)                                               | 173 (1.1)   | 1.02 (0.99-1.06)                    |
| Sepsis                        | 686 (4.5)                                               | 1 331 (8.5) | <b>1.09 (1.08-1.11)</b>             |
| Convulsions                   | 53 (0.4)                                                | 62 (0.4)    | 1.00 (0.94-1.04)                    |
| Severe birth trauma           | 29 (0.2)                                                | 26 (0.2)    | 0.96 (0.89-1.04)                    |
| <b>Late PTB (34-36 weeks)</b> |                                                         |             |                                     |
| BPD                           | 6 (0.1)                                                 | 4 (0.0)     | 0.96 (0.81-1.12)                    |
| IVH (grade $\geq 3$ )         | 3 (0.0)                                                 | 3 (0.0)     | 0.97 (0.78-1.21)                    |
| PVL                           | 0 (0.0)                                                 | 0 (0.0)     | 1.05 (0.64-1.72)                    |
| ROP                           | 0 (0.0)                                                 | 2 (0.0)     | 1.56 (0.85-2.87)                    |
| NEC                           | 16 (0.1)                                                | 21 (0.2)    | 1.04 (0.95-1.14)                    |
| Sepsis                        | 211 (1.7)                                               | 530 (4.5)   | <b>1.12 (1.10-1.14)</b>             |
| Convulsions                   | 26 (0.2)                                                | 28 (0.2)    | 1.01 (0.93-1.09)                    |
| Severe birth trauma           | 16 (0.1)                                                | 14 (0.1)    | 0.97 (0.87-1.08)                    |
| <b>PTB at 28-33 weeks</b>     |                                                         |             |                                     |
| BPD                           | 121 (4.7)                                               | 95 (3.0)    | <b>0.93 (0.89-0.97)</b>             |
| IVH (grade $\geq 3$ )         | 24 (0.9)                                                | 19 (0.6)    | 0.92 (0.84-1.01)                    |
| PVL                           | 8 (0.3)                                                 | 15 (0.5)    | 1.06 (0.93-1.21)                    |
| ROP                           | 35 (1.3)                                                | 63 (2.0)    | 1.05 (0.99-1.11)                    |
| NEC                           | 76 (2.9)                                                | 89 (2.8)    | 1.00 (0.95-1.05)                    |
| Sepsis                        | 306 (11.8)                                              | 554 (17.3)  | <b>1.07 (1.05-1.10)</b>             |
| Convulsions                   | 19 (0.7)                                                | 20 (0.6)    | 0.96 (0.87-1.05)                    |
| Severe birth trauma           | 9 (0.4)                                                 | 9 (0.3)     | 0.95 (0.82-1.11)                    |
| <b>PTB at 24-27 weeks</b>     |                                                         |             |                                     |

|                       |            |            |                         |
|-----------------------|------------|------------|-------------------------|
| BPD                   | 179 (36.6) | 170 (28.4) | 0.97 (0.94-1.01)        |
| IVH (grade $\geq 3$ ) | 45 (9.2)   | 39 (6.5)   | 0.95 (0.88-1.01)        |
| PVL                   | 5 (1.0)    | 12 (2.0)   | 1.13 (0.96-1.32)        |
| ROP                   | 25 (5.1)   | 21 (3.5)   | 0.95 (0.87-1.02)        |
| NEC                   | 37 (7.6)   | 63 (10.5)  | 1.04 (0.98-1.10)        |
| Sepsis                | 169 (34.6) | 247 (41.3) | <b>1.05 (1.01-1.09)</b> |
| Convulsions           | 8 (1.6)    | 14 (2.3)   | 1.02 (0.91-1.14)        |
| Severe birth trauma   | 4 (0.8)    | 3 (0.5)    | 0.94 (0.76-1.15)        |

CI, confidence interval; PTB, preterm birth; BPD, bronchopulmonary dysplasia; IVH, intraventricular hemorrhage; PVL, periventricular leukomalacia; ROP, retinopathy of prematurity; NEC, necrotizing enterocolitis.

Adjusted odds ratios express the average annual change in the odds for each morbidity.

Bolded value indicates statistical significance at  $p < 0.05$

†Calendar year was modelled as a continuous variable; adjusted for temporal changes in maternal age, BMI, race, education, smoking, marital status, parity, chronic hypertension, pre-pregnancy diabetes, assisted conception, health insurance provider, gestational age, SGA infant, sex, and congenital anomalies. NOTE: some covariates were excluded from the regression models due to collinearity.

## STROBE Statement—checklist of items that should be included in reports of observational studies

|                              | Item No | Recommendation                                                                                                                                                                                                                                                                                                                                                                                                                                                                                                                                                                                                                                                                                                                                                                                    |
|------------------------------|---------|---------------------------------------------------------------------------------------------------------------------------------------------------------------------------------------------------------------------------------------------------------------------------------------------------------------------------------------------------------------------------------------------------------------------------------------------------------------------------------------------------------------------------------------------------------------------------------------------------------------------------------------------------------------------------------------------------------------------------------------------------------------------------------------------------|
| <b>Title and abstract</b>    | 1       | Indicate the study's design with a commonly used term in the title or the abstract<br><b>This was done, title page; "a population-based study"</b><br>(b) Provide in the abstract an informative and balanced summary of what was done and what was found<br><b>This was done, abstract, page 2; "We described concomitant changes in..."</b>                                                                                                                                                                                                                                                                                                                                                                                                                                                     |
| <b>Introduction</b>          |         |                                                                                                                                                                                                                                                                                                                                                                                                                                                                                                                                                                                                                                                                                                                                                                                                   |
| Background/rationale         | 2       | Explain the scientific background and rationale for the investigation being reported<br><b>This was done, page 4-5; "However, it is unknown whether the temporal decline in preterm birth is associated with..."</b>                                                                                                                                                                                                                                                                                                                                                                                                                                                                                                                                                                              |
| Objectives                   | 3       | State specific objectives, including any prespecified hypotheses<br><b>This was done, page 5; "Our aim was to describe temporal trends in ..."</b>                                                                                                                                                                                                                                                                                                                                                                                                                                                                                                                                                                                                                                                |
| <b>Methods</b>               |         |                                                                                                                                                                                                                                                                                                                                                                                                                                                                                                                                                                                                                                                                                                                                                                                                   |
| Study design                 | 4       | Present key elements of study design early in the paper<br><b>This was done, page 5; "We carried out a population-based study including..."</b>                                                                                                                                                                                                                                                                                                                                                                                                                                                                                                                                                                                                                                                   |
| Setting                      | 5       | Describe the setting, locations, and relevant dates, including periods of recruitment, exposure, follow-up, and data collection<br><b>This was done, page 5; "... all singleton hospital births to mothers aged 15 to 60 in Washington State, U.S.A., between January 1, 2004, and..."</b>                                                                                                                                                                                                                                                                                                                                                                                                                                                                                                        |
| Participants                 | 6       | (a) <i>Cohort study</i> —Give the eligibility criteria, and the sources and methods of selection of participants. Describe methods of follow-up<br><i>Case-control study</i> —Give the eligibility criteria, and the sources and methods of case ascertainment and control selection. Give the rationale for the choice of cases and controls<br><i>Cross-sectional study</i> —Give the eligibility criteria, and the sources and methods of selection of participants<br><b>This was done, page 5-6; "We used information from two linked population databases..."</b><br>(b) <i>Cohort study</i> —For matched studies, give matching criteria and number of exposed and unexposed<br><i>Case-control study</i> —For matched studies, give matching criteria and the number of controls per case |
| Variables                    | 7       | Clearly define all outcomes, exposures, predictors, potential confounders, and effect modifiers. Give diagnostic criteria, if applicable<br><b>This was done, page 6-7; "The primary outcomes were neonatal mortality and a composite adverse outcome including..."</b>                                                                                                                                                                                                                                                                                                                                                                                                                                                                                                                           |
| Data sources/<br>measurement | 8*      | For each variable of interest, give sources of data and details of methods of assessment (measurement). Describe comparability of assessment methods if there is more than one group<br><b>This was done, page 5-6; "...diagnosis and procedure codes related to each hospitalization episode coded by the International Classification of..."</b>                                                                                                                                                                                                                                                                                                                                                                                                                                                |
| Bias                         | 9       | Describe any efforts to address potential sources of bias<br><b>This was done, page 6-7; inclusion/exclusion criteria, consistent use of case ascertainment by ICD-9-CM codes from administrative data to avoid recall bias</b>                                                                                                                                                                                                                                                                                                                                                                                                                                                                                                                                                                   |

1  
2  
3  
4  
5  
6  
7  
8  
9  
10  
11  
12  
13  
14  
15  
16  
17  
18  
19  
20  
21  
22  
23  
24  
25  
26  
27  
28  
29  
30  
31  
32  
33

**or diagnostic bias**

---

|                        |    |                                                                                                                                                                                                                                                                                                                                                                                                                                                                                                                                                                                                                                                                                                                                                                                                                                                                                                                                                                                                                                                                                                                                                                         |
|------------------------|----|-------------------------------------------------------------------------------------------------------------------------------------------------------------------------------------------------------------------------------------------------------------------------------------------------------------------------------------------------------------------------------------------------------------------------------------------------------------------------------------------------------------------------------------------------------------------------------------------------------------------------------------------------------------------------------------------------------------------------------------------------------------------------------------------------------------------------------------------------------------------------------------------------------------------------------------------------------------------------------------------------------------------------------------------------------------------------------------------------------------------------------------------------------------------------|
| Study size             | 10 | Explain how the study size was arrived at<br><b>This was done, page 5; population-based; "... all singleton hospital births to mothers aged 15 to 60 in Washington State, U.S.A., between January 1, 2004, and..."</b>                                                                                                                                                                                                                                                                                                                                                                                                                                                                                                                                                                                                                                                                                                                                                                                                                                                                                                                                                  |
| Quantitative variables | 11 | Explain how quantitative variables were handled in the analyses. If applicable, describe which groupings were chosen and why<br><b>This was done, page 8-9; "The preterm birth rate was calculated as a proportion of live births..."</b>                                                                                                                                                                                                                                                                                                                                                                                                                                                                                                                                                                                                                                                                                                                                                                                                                                                                                                                               |
| Statistical methods    | 12 | <p>(a) Describe all statistical methods, including those used to control for confounding<br/><b>This was done, page 8; "Logistic regression was used to assess temporal trends...adjusted for temporal changes in risk factors..."</b></p> <p>(b) Describe any methods used to examine subgroups and interactions<br/><b>This was done, page 8-9; "Temporal trends in the individual components of the composite outcome were examined... using logistic regression models..."</b></p> <p>(c) Explain how missing data were addressed <b>This was done; page 9; "Missing values for BMI... were imputed using multiple imputation... other missing values were &lt;3% of the total, and the complete case multivariable analysis included 93% of preterm births..."</b></p> <p>(d) <i>Cohort study</i>—If applicable, explain how loss to follow-up was addressed<br/><i>Case-control study</i>—If applicable, explain how matching of cases and controls was addressed<br/><i>Cross-sectional study</i>—If applicable, describe analytical methods taking account of sampling strategy <b>n/a</b></p> <p>(e) Describe any sensitivity analyses <b>not included</b></p> |

---

34  
35  
36  
37  
38  
39  
40  
41  
42  
43  
44  
45  
46  
47  
48  
49  
50  
51  
52  
53  
54  
55  
56  
57  
58  
59  
60

Continued on next page

**Results**

|                          |     |                                                                                                                                                                                                                                                                                                                                                                                                                                                                                                                                                                                                                                                                     |
|--------------------------|-----|---------------------------------------------------------------------------------------------------------------------------------------------------------------------------------------------------------------------------------------------------------------------------------------------------------------------------------------------------------------------------------------------------------------------------------------------------------------------------------------------------------------------------------------------------------------------------------------------------------------------------------------------------------------------|
| Participants             | 13* | (a) Report numbers of individuals at each stage of study—eg numbers potentially eligible, examined for eligibility, confirmed eligible, included in the study, completing follow-up, and analysed<br><b>This was done, page 10; “Overall, 871 649 singleton births occurred...the study population included 754 763 singleton infants born in hospital...”</b><br>(b) Give reasons for non-participation at each stage <b>This was done, page 10; “We excluded births at &lt;24 or &gt;45 weeks’ gestation, multiple births, births that occurred outside of Washington State...”</b><br>(c) Consider use of a flow diagram <b>This was done, Appendix Figure 2</b> |
| Descriptive data         | 14* | (a) Give characteristics of study participants (eg demographic, clinical, social) and information on exposures and potential confounders <b>This was done, Table 1</b><br>(b) Indicate number of participants with missing data for each variable of interest <b>This was done, Table 1</b><br>(c) <i>Cohort study</i> —Summarise follow-up time (eg, average and total amount)                                                                                                                                                                                                                                                                                     |
| Outcome data             | 15* | <i>Cohort study</i> —Report numbers of outcome events or summary measures over time<br><i>Case-control study</i> —Report numbers in each exposure category, or summary measures of exposure<br><i>Cross-sectional study</i> —Report numbers of outcome events or summary measures <b>This was done; Table 2, Table 3, Table 4, Figure 1, Figure 2</b>                                                                                                                                                                                                                                                                                                               |
| Main results             | 16  | (a) Give unadjusted estimates and, if applicable, confounder-adjusted estimates and their precision (eg, 95% confidence interval). Make clear which confounders were adjusted for and why they were included <b>This was done; Table 2, Table 3, Table 4</b><br>(b) Report category boundaries when continuous variables were categorized <b>This was done, Table 1</b><br>(c) If relevant, consider translating estimates of relative risk into absolute risk for a meaningful time period                                                                                                                                                                         |
| Other analyses           | 17  | Report other analyses done—eg analyses of subgroups and interactions, and sensitivity analyses <b>This was done, page 16, Appendix Table 4</b>                                                                                                                                                                                                                                                                                                                                                                                                                                                                                                                      |
| <b>Discussion</b>        |     |                                                                                                                                                                                                                                                                                                                                                                                                                                                                                                                                                                                                                                                                     |
| Key results              | 18  | Summarise key results with reference to study objectives <b>This was done, page 17; “Our findings show a decline in the preterm birth rate...”</b>                                                                                                                                                                                                                                                                                                                                                                                                                                                                                                                  |
| Limitations              | 19  | Discuss limitations of the study, taking into account sources of potential bias or imprecision. Discuss both direction and magnitude of any potential bias <b>This was done, page 20; “This study has a few limitations. First, clinical details on the severity of some...”</b>                                                                                                                                                                                                                                                                                                                                                                                    |
| Interpretation           | 20  | Give a cautious overall interpretation of results considering objectives, limitations, multiplicity of analyses, results from similar studies, and other relevant evidence <b>This was done, page 22; “The small decline in the preterm birth rate...was predominately due to...”</b>                                                                                                                                                                                                                                                                                                                                                                               |
| Generalisability         | 21  | Discuss the generalisability (external validity) of the study results <b>This was done, page 21; “We adjusted for a number of these indices thus our results are fairly generalizable to other states...or high-income countries...”</b>                                                                                                                                                                                                                                                                                                                                                                                                                            |
| <b>Other information</b> |     |                                                                                                                                                                                                                                                                                                                                                                                                                                                                                                                                                                                                                                                                     |
| Funding                  | 22  | Give the source of funding and the role of the funders for the present study and, if applicable, for the original study on which the present article is based <b>This was done, title page; “This work was supported by...”</b>                                                                                                                                                                                                                                                                                                                                                                                                                                     |



1  
2 \*Give information separately for cases and controls in case-control studies and, if applicable, for exposed and  
3 unexposed groups in cohort and cross-sectional studies.  
4

5 **Note:** An Explanation and Elaboration article discusses each checklist item and gives methodological background and  
6 published examples of transparent reporting. The STROBE checklist is best used in conjunction with this article (freely  
7 available on the Web sites of PLoS Medicine at <http://www.plosmedicine.org/>, Annals of Internal Medicine at  
8 <http://www.annals.org/>, and Epidemiology at <http://www.epidem.com/>). Information on the STROBE Initiative is  
9 available at [www.strobe-statement.org](http://www.strobe-statement.org).  
10  
11  
12  
13  
14  
15  
16  
17  
18  
19  
20  
21  
22  
23  
24  
25  
26  
27  
28  
29  
30  
31  
32  
33  
34  
35  
36  
37  
38  
39  
40  
41  
42  
43  
44  
45  
46  
47  
48  
49  
50  
51  
52  
53  
54  
55  
56  
57  
58  
59  
60
