# Supplementary material for: Temporal trends in neonatal mortality and morbidity following spontaneous and clinician-initiated preterm birth in Washington State, USA: a population-based study
Source: PubMed Central journal article supplement — BMJ Open. 2019 Feb 1;9(1):e023004. doi: 10.1136/bmjopen-2018-023004 (PMC6361413; doi:10.1136/bmjopen-2018-023004), 2019-02-01
Supplement: bmjopen-2018-023004supp001.pdf [file bmjopen-2018-023004supp001.pdf]

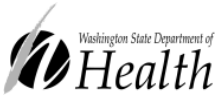

# Washington State Birth Filing Form

### For Hospital Use Only

|                                                                                                                                                                                                      |                           |
|------------------------------------------------------------------------------------------------------------------------------------------------------------------------------------------------------|---------------------------|
| Mother's Medical Record #:                                                                                                                                                                           | Child's Medical Record #: |
| Plurality: <input type="checkbox"/> 1- single birth <input type="checkbox"/> 2- twin <input type="checkbox"/> 3- triplet <input type="checkbox"/> Other _____                                        |                           |
| If multiple, this worksheet is for child: <input type="checkbox"/> 1- first born <input type="checkbox"/> 2- second born <input type="checkbox"/> 3- third born <input type="checkbox"/> Other _____ |                           |

### Child's Information

|                                                                                  |                                                                                                                                                                                                                                                           |                                                                                         |
|----------------------------------------------------------------------------------|-----------------------------------------------------------------------------------------------------------------------------------------------------------------------------------------------------------------------------------------------------------|-----------------------------------------------------------------------------------------|
| <b>*1. Child's Name</b>                                                          | <b>*3. Time of Birth</b>                                                                                                                                                                                                                                  | <b>*4. Child's Sex</b><br><input type="checkbox"/> Male <input type="checkbox"/> Female |
| First _____ Middle _____ Last _____                                              | _____ / _____ / _____                                                                                                                                                                                                                                     |                                                                                         |
| <b>*2. Child's Date of Birth</b> (MM/DD/YYYY)                                    | <b>6. Planned Birth Place, if different (specify):</b>                                                                                                                                                                                                    |                                                                                         |
| / /                                                                              | <input type="checkbox"/> Hospital <input type="checkbox"/> Home<br><input type="checkbox"/> Enroute <input type="checkbox"/> Clinic/Doctor's Office<br><input type="checkbox"/> Freestanding Birth Center <input type="checkbox"/> Other (specify): _____ |                                                                                         |
| <b>*7. Name of Facility</b> (If not a facility, enter name of place and address) | <b>*8. County of Birth</b>                                                                                                                                                                                                                                | <b>*9. City of Birth</b>                                                                |

### Mother's Information

|                                                                                                                                                                                                                                                                                                                                                                                                                                                                                                                                                                                                                    |                                                                                                                                                                                                                                                                                                             |                                                                                                                                                                                                                                                                                                                                                                                                                                                                                                                                                                                                                                                                                                                                                                                              |
|--------------------------------------------------------------------------------------------------------------------------------------------------------------------------------------------------------------------------------------------------------------------------------------------------------------------------------------------------------------------------------------------------------------------------------------------------------------------------------------------------------------------------------------------------------------------------------------------------------------------|-------------------------------------------------------------------------------------------------------------------------------------------------------------------------------------------------------------------------------------------------------------------------------------------------------------|----------------------------------------------------------------------------------------------------------------------------------------------------------------------------------------------------------------------------------------------------------------------------------------------------------------------------------------------------------------------------------------------------------------------------------------------------------------------------------------------------------------------------------------------------------------------------------------------------------------------------------------------------------------------------------------------------------------------------------------------------------------------------------------------|
| <b>10. Mother's Current Legal Name</b>                                                                                                                                                                                                                                                                                                                                                                                                                                                                                                                                                                             | <b>11. Mother's Name on her Birth Certificate</b>                                                                                                                                                                                                                                                           | <b>14. Social Security Number</b>                                                                                                                                                                                                                                                                                                                                                                                                                                                                                                                                                                                                                                                                                                                                                            |
| First _____ Middle _____ Last _____                                                                                                                                                                                                                                                                                                                                                                                                                                                                                                                                                                                | First _____ Middle _____ Last/Maiden _____                                                                                                                                                                                                                                                                  | _____ - _____ - _____                                                                                                                                                                                                                                                                                                                                                                                                                                                                                                                                                                                                                                                                                                                                                                        |
| <b>*12. Date of Birth</b> (MM/DD/YYYY)                                                                                                                                                                                                                                                                                                                                                                                                                                                                                                                                                                             | <b>*13. Birthplace</b> (State, Territory, or Foreign Country)                                                                                                                                                                                                                                               |                                                                                                                                                                                                                                                                                                                                                                                                                                                                                                                                                                                                                                                                                                                                                                                              |
| / /                                                                                                                                                                                                                                                                                                                                                                                                                                                                                                                                                                                                                |                                                                                                                                                                                                                                                                                                             |                                                                                                                                                                                                                                                                                                                                                                                                                                                                                                                                                                                                                                                                                                                                                                                              |
| <b>15. Do you want to get a Social Security Number for your child?</b> <input type="checkbox"/> Yes <input type="checkbox"/> No                                                                                                                                                                                                                                                                                                                                                                                                                                                                                    |                                                                                                                                                                                                                                                                                                             |                                                                                                                                                                                                                                                                                                                                                                                                                                                                                                                                                                                                                                                                                                                                                                                              |
| <b>16a. Residence: Number and Street</b> (e.g., 624 SE 5 <sup>th</sup> St.)                                                                                                                                                                                                                                                                                                                                                                                                                                                                                                                                        |                                                                                                                                                                                                                                                                                                             | Apt No. _____                                                                                                                                                                                                                                                                                                                                                                                                                                                                                                                                                                                                                                                                                                                                                                                |
| <b>16b. If not U.S.: Country</b>                                                                                                                                                                                                                                                                                                                                                                                                                                                                                                                                                                                   | <b>16c. State</b>                                                                                                                                                                                                                                                                                           | <b>16d. County</b>                                                                                                                                                                                                                                                                                                                                                                                                                                                                                                                                                                                                                                                                                                                                                                           |
| <b>16e. If you live on Tribal Reservation, give name</b>                                                                                                                                                                                                                                                                                                                                                                                                                                                                                                                                                           | <b>16f. City or Town</b>                                                                                                                                                                                                                                                                                    | <b>16g. Zip Code + 4</b>                                                                                                                                                                                                                                                                                                                                                                                                                                                                                                                                                                                                                                                                                                                                                                     |
| <b>16h. Inside City Limits?</b><br><input type="checkbox"/> Yes <input type="checkbox"/> No <input type="checkbox"/> Unknown                                                                                                                                                                                                                                                                                                                                                                                                                                                                                       | <b>17. How Long at Current Residence?</b><br>Years: _____ Months: _____                                                                                                                                                                                                                                     | <b>18. Telephone Number</b><br>( ) _____                                                                                                                                                                                                                                                                                                                                                                                                                                                                                                                                                                                                                                                                                                                                                     |
| <b>19a. Mailing Address, if different: Number and Street, or PO Box</b>                                                                                                                                                                                                                                                                                                                                                                                                                                                                                                                                            |                                                                                                                                                                                                                                                                                                             | Apt No. _____                                                                                                                                                                                                                                                                                                                                                                                                                                                                                                                                                                                                                                                                                                                                                                                |
| <b>19b. If not U.S.; Country</b>                                                                                                                                                                                                                                                                                                                                                                                                                                                                                                                                                                                   | <b>19c. State</b>                                                                                                                                                                                                                                                                                           | <b>19d. City</b>                                                                                                                                                                                                                                                                                                                                                                                                                                                                                                                                                                                                                                                                                                                                                                             |
|                                                                                                                                                                                                                                                                                                                                                                                                                                                                                                                                                                                                                    |                                                                                                                                                                                                                                                                                                             | <b>19e. Zip Code + 4</b>                                                                                                                                                                                                                                                                                                                                                                                                                                                                                                                                                                                                                                                                                                                                                                     |
| <b>20. Occupation</b> (type of work done during last year)                                                                                                                                                                                                                                                                                                                                                                                                                                                                                                                                                         |                                                                                                                                                                                                                                                                                                             | <b>21. Kind of Business/Industry</b> (do not use company name)                                                                                                                                                                                                                                                                                                                                                                                                                                                                                                                                                                                                                                                                                                                               |
| <b>22. Mother's Education</b><br>(Check the box that best describes the highest degree or level of school completed at the time of delivery.)                                                                                                                                                                                                                                                                                                                                                                                                                                                                      | <b>23. Mother of Hispanic Origin?</b><br>(Check the box that best describes whether the mother is Spanish/Hispanic/Latina or check "No" box if not Spanish/Hispanic/Latina.)                                                                                                                                | <b>24. Mother's Race</b> (check one or more)                                                                                                                                                                                                                                                                                                                                                                                                                                                                                                                                                                                                                                                                                                                                                 |
| 1 <input type="checkbox"/> 8 <sup>th</sup> grade or less (specify): _____<br>2 <input type="checkbox"/> 9 <sup>th</sup> - 12 <sup>th</sup> grade; no diploma<br>3 <input type="checkbox"/> High school graduate or GED<br>4 <input type="checkbox"/> Some college credit, but no degree<br>5 <input type="checkbox"/> Associate degree (AA, AS, etc.)<br>6 <input type="checkbox"/> Bachelor's degree (BA, AB, BS, etc.)<br>7 <input type="checkbox"/> Master's degree (MA, MS, MEd, MSW, MBA, etc.)<br>8 <input type="checkbox"/> Doctorate (PhD, EdD, etc.) or professional degree (MD, DDS, DVM, LLB, JD, etc.) | 1 <input type="checkbox"/> No, not Spanish/Hispanic/Latina<br>2 <input type="checkbox"/> Yes, Mexican, Mexican American, Chicana<br>3 <input type="checkbox"/> Yes, Puerto Rican<br>4 <input type="checkbox"/> Yes, Cuban<br>5 <input type="checkbox"/> Yes, Other Spanish/Hispanic/Latina (specify): _____ | 1 <input type="checkbox"/> White<br>2 <input type="checkbox"/> Black or African American<br>3 <input type="checkbox"/> American Indian or Alaska Native<br>(Name of enrolled or principal tribe) _____<br>4 <input type="checkbox"/> Asian Indian      5 <input type="checkbox"/> Chinese<br>6 <input type="checkbox"/> Filipino      7 <input type="checkbox"/> Japanese<br>8 <input type="checkbox"/> Korean      9 <input type="checkbox"/> Vietnamese<br>10 <input type="checkbox"/> Other Asian (specify): _____<br>11 <input type="checkbox"/> Native Hawaiian    12 <input type="checkbox"/> Guamanian or Chamorro<br>13 <input type="checkbox"/> Samoan<br>14 <input type="checkbox"/> Other Pacific Islander (specify): _____<br>15 <input type="checkbox"/> Other (specify): _____ |

Continue on next page

|                      |                                                                                                               |                                                                              |                                                                                                                       |
|----------------------|---------------------------------------------------------------------------------------------------------------|------------------------------------------------------------------------------|-----------------------------------------------------------------------------------------------------------------------|
| Mother's Information | 25. Mother's Height<br>Feet: _____ Inches: _____                                                              | 26. Mother's Pre-Pregnancy Weight (pounds)                                   | 27. Did Mother get WIC food for herself during pregnancy?<br><input type="checkbox"/> Yes <input type="checkbox"/> No |
|                      | 28. Cigarette Smoking Before and During Pregnancy<br><input type="checkbox"/> Yes <input type="checkbox"/> No | Average number of cigarettes or packs per day:<br># of cigarettes # of packs |                                                                                                                       |
|                      |                                                                                                               | Three months before pregnancy                                                | _____ or _____                                                                                                        |
|                      |                                                                                                               | First three months of pregnancy                                              | _____ or _____                                                                                                        |
|                      |                                                                                                               | Second three months of pregnancy                                             | _____ or _____                                                                                                        |
|                      |                                                                                                               | Last three months of pregnancy                                               | _____ or _____                                                                                                        |

**Mother's Marital Status**

29. Is mother married? (Check only one box)

**Important - Read before responding to marital status question:**  
*If you were married at any time during your pregnancy, your spouse or partner is considered the other legal parent unless he or she completes a denial of paternity and another man acknowledges that he is the father (chapter 26.26 RCW). To add someone other than your spouse or partner to the birth certificate, an acknowledgment and denial of paternity needs to be completed by all parties (DOH form 422-032). Under Washington State law, a state-registered domestic partnership is considered the same as a marriage (chapter 26.60 RCW).*

*If you were not married at any time during the pregnancy, an acknowledgment of paternity needs to be completed to add the father to the birth certificate.*

|                                                                                                              |                                                                                                                                                         |                                                                                                                                                         |                                                                                                                                                                                                                                                            |
|--------------------------------------------------------------------------------------------------------------|---------------------------------------------------------------------------------------------------------------------------------------------------------|---------------------------------------------------------------------------------------------------------------------------------------------------------|------------------------------------------------------------------------------------------------------------------------------------------------------------------------------------------------------------------------------------------------------------|
| <b>Married - Yes</b>                                                                                         |                                                                                                                                                         | <b>Married - No</b>                                                                                                                                     |                                                                                                                                                                                                                                                            |
| 29a. <input type="checkbox"/> Yes, I am married to the other parent identified in box #30.                   |                                                                                                                                                         | 29d. <input type="checkbox"/> No, I am not married and I am providing information about the father in box #30.                                          | <i>Ask hospital staff for a Paternity Acknowledgment form (#DOH 422-032). If you were married any time during the pregnancy and your previous spouse is not the parent identified in box #30, the spouse's Denial of Paternity must also be completed.</i> |
| 29b. <input type="checkbox"/> Yes, I am married but not to the other person identified in box #30.           | <i>Ask hospital staff for a Paternity Acknowledgment form (# DOH 422-032). You must complete this form, including the spouse's Denial of Paternity.</i> | 29e. <input type="checkbox"/> No, I am not married now, but I was married to the other parent identified in box #30 at some time during this pregnancy. |                                                                                                                                                                                                                                                            |
| 29c. <input type="checkbox"/> Yes, I am married but I refuse to provide the spouse or partner's information. |                                                                                                                                                         | 29f. <input type="checkbox"/> No, I am not married and I refuse to provide the father's information.                                                    |                                                                                                                                                                                                                                                            |
| <i>If this box is checked, the other parent will be listed on the birth certificate as "None Named".</i>     |                                                                                                                                                         | <i>If this box is checked, the other parent will be listed on the birth certificate as "None Named".</i>                                                |                                                                                                                                                                                                                                                            |

**Father/ Parent's Information**

|                                                                                                                                                                                                                                                                                                                                                                                                                                                                                                                                                                                                                    |                                                                                                                                                                                                                                                                                                             |                                                                                                                                                                                                                                                                                                                                                                                                                                                                                                                                                                                                                                                                                                                                                                                                   |
|--------------------------------------------------------------------------------------------------------------------------------------------------------------------------------------------------------------------------------------------------------------------------------------------------------------------------------------------------------------------------------------------------------------------------------------------------------------------------------------------------------------------------------------------------------------------------------------------------------------------|-------------------------------------------------------------------------------------------------------------------------------------------------------------------------------------------------------------------------------------------------------------------------------------------------------------|---------------------------------------------------------------------------------------------------------------------------------------------------------------------------------------------------------------------------------------------------------------------------------------------------------------------------------------------------------------------------------------------------------------------------------------------------------------------------------------------------------------------------------------------------------------------------------------------------------------------------------------------------------------------------------------------------------------------------------------------------------------------------------------------------|
| <b>*30. Current Legal Name</b>                                                                                                                                                                                                                                                                                                                                                                                                                                                                                                                                                                                     |                                                                                                                                                                                                                                                                                                             |                                                                                                                                                                                                                                                                                                                                                                                                                                                                                                                                                                                                                                                                                                                                                                                                   |
| First                                                                                                                                                                                                                                                                                                                                                                                                                                                                                                                                                                                                              | Middle                                                                                                                                                                                                                                                                                                      | Last                                                                                                                                                                                                                                                                                                                                                                                                                                                                                                                                                                                                                                                                                                                                                                                              |
| <b>*31. Date of Birth</b> (MM/DD/YYYY)<br>____ / ____ / ____                                                                                                                                                                                                                                                                                                                                                                                                                                                                                                                                                       |                                                                                                                                                                                                                                                                                                             | <b>*32. Birthplace</b> (State, Territory, or Foreign Country)                                                                                                                                                                                                                                                                                                                                                                                                                                                                                                                                                                                                                                                                                                                                     |
|                                                                                                                                                                                                                                                                                                                                                                                                                                                                                                                                                                                                                    |                                                                                                                                                                                                                                                                                                             | <b>33. Social Security Number</b>                                                                                                                                                                                                                                                                                                                                                                                                                                                                                                                                                                                                                                                                                                                                                                 |
| <b>34. Occupation</b> (type of work done during last year.)                                                                                                                                                                                                                                                                                                                                                                                                                                                                                                                                                        |                                                                                                                                                                                                                                                                                                             | <b>35. Kind of Business/Industry</b> (do not use Company Name)                                                                                                                                                                                                                                                                                                                                                                                                                                                                                                                                                                                                                                                                                                                                    |
| <b>36. Father/Parent Education</b><br>(Check the box that best describes the highest degree or level of school completed at the time of delivery.)                                                                                                                                                                                                                                                                                                                                                                                                                                                                 | <b>37. Father/Parent of Hispanic Origin?</b><br>(Check the box that best describes whether the father/parent is Spanish/Hispanic/Latino or check "No" box if not Spanish/Hispanic/Latino.)                                                                                                                  | <b>38. Father/Parent Race</b> (check one or more)                                                                                                                                                                                                                                                                                                                                                                                                                                                                                                                                                                                                                                                                                                                                                 |
| 1 <input type="checkbox"/> 8 <sup>th</sup> grade or less (specify): _____<br>2 <input type="checkbox"/> 9 <sup>th</sup> - 12 <sup>th</sup> grade; no diploma<br>3 <input type="checkbox"/> High school graduate or GED<br>4 <input type="checkbox"/> Some college credit, but no degree<br>5 <input type="checkbox"/> Associate degree (AA, AS, etc.)<br>6 <input type="checkbox"/> Bachelor's degree (BA, AB, BS, etc.)<br>7 <input type="checkbox"/> Master's degree (MA, MS, MEd, MSW, MBA, etc.)<br>8 <input type="checkbox"/> Doctorate (PhD, EdD, etc.) or professional degree (MD, DDS, DVM, LLB, JD, etc.) | 1 <input type="checkbox"/> No, not Spanish/Hispanic/Latino<br>2 <input type="checkbox"/> Yes, Mexican, Mexican American, Chicano<br>3 <input type="checkbox"/> Yes, Puerto Rican<br>4 <input type="checkbox"/> Yes, Cuban<br>5 <input type="checkbox"/> Yes, other Spanish/Hispanic/Latino (specify): _____ | 1 <input type="checkbox"/> White<br>2 <input type="checkbox"/> Black or African American<br>3 <input type="checkbox"/> American Indian or Alaska Native<br>(Name of enrolled or principal tribe)<br>4 <input type="checkbox"/> Asian Indian      5 <input type="checkbox"/> Chinese<br>6 <input type="checkbox"/> Filipino          7 <input type="checkbox"/> Japanese<br>8 <input type="checkbox"/> Korean             9 <input type="checkbox"/> Vietnamese<br>10 <input type="checkbox"/> Other Asian (specify): _____<br>11 <input type="checkbox"/> Native Hawaiian    12 <input type="checkbox"/> Guamanian or Chamorro<br>13 <input type="checkbox"/> Samoan<br>14 <input type="checkbox"/> Other Pacific Islander (specify): _____<br>15 <input type="checkbox"/> Other (specify): _____ |

**For Hospital Use Only**

**Mother's Statistical Information**

|                                                                                                                                                                                                                           |                                                                          |                                                                                                                                                                                                                                                                                                                                                                   |
|---------------------------------------------------------------------------------------------------------------------------------------------------------------------------------------------------------------------------|--------------------------------------------------------------------------|-------------------------------------------------------------------------------------------------------------------------------------------------------------------------------------------------------------------------------------------------------------------------------------------------------------------------------------------------------------------|
| 39. Date of <u>First</u> Prenatal Care Visit (MM/DD/YYYY)<br>/ / <input type="checkbox"/> No Prenatal Care                                                                                                                | 40. Date of <u>Last</u> Prenatal Care Visit (MM/DD/YYYY)<br>/ /          | 41. Total Number of Prenatal Visits for this Pregnancy<br>(If none, enter '0')                                                                                                                                                                                                                                                                                    |
| 42. Number of Previous Live Births (Do not include this child)<br>Number Now Living <input type="checkbox"/> None<br>Number Now Dead <input type="checkbox"/> None                                                        | 43. Date of Last Live Birth (MM/YYYY) (Do not include this child)<br>/ / | 44. Number of Other Pregnancy Outcomes<br>(Spontaneous or induced losses or ectopic pregnancies)<br>Number of Other Outcomes <input type="checkbox"/> None                                                                                                                                                                                                        |
| 45. Date of Last Other Pregnancy Outcome (MM/YYYY)<br>/ /                                                                                                                                                                 | 46. Date Last Normal Menses Began (MM/DD/YYYY)<br>/ /                    | 47. Mother's Weight at Delivery(pounds)                                                                                                                                                                                                                                                                                                                           |
| 48. Was mother transferred to higher level care for maternal medical or fetal indications for delivery? <input type="checkbox"/> Yes <input type="checkbox"/> No<br>If yes, name of facility mother was transferred from: |                                                                          | 49. Principal Source of Payment for this Delivery<br><input type="checkbox"/> Medicaid <input type="checkbox"/> Self-Pay <input type="checkbox"/> Private Insurance<br><input type="checkbox"/> Other Gov't <input type="checkbox"/> Tricare <input type="checkbox"/> Indian Health<br><input type="checkbox"/> Charity Care <input type="checkbox"/> Other _____ |

**Child's Statistical Information**

|                                                                                                                                                                         |                                             |                                                                                                                                                                          |
|-------------------------------------------------------------------------------------------------------------------------------------------------------------------------|---------------------------------------------|--------------------------------------------------------------------------------------------------------------------------------------------------------------------------|
| 50. Birth Weight<br>lbs:          ozs:          or grams:                                                                                                               | 51. Infant Head Circumference (cm)<br>_____ | 52. Obstetric Estimate of Gestation (completed weeks)                                                                                                                    |
| 53. Apgar score at 5 minutes _____ If score is less than 6, score at 10 minutes _____                                                                                   |                                             |                                                                                                                                                                          |
| 54. Plurality: <input type="checkbox"/> Single <input type="checkbox"/> twins <input type="checkbox"/> triplets <input type="checkbox"/> other _____                    |                                             | 55. If not single birth; birth order: <input type="checkbox"/> first <input type="checkbox"/> second <input type="checkbox"/> third <input type="checkbox"/> other _____ |
| 56. Was infant transferred within 24 hours of delivery? <input type="checkbox"/> Yes <input type="checkbox"/> No<br>If yes, name of facility infant was transferred to: |                                             | 57. Is infant living at the time of report? <input type="checkbox"/> Yes <input type="checkbox"/> No <input type="checkbox"/> Transferred, status unknown                |
|                                                                                                                                                                         |                                             | 58. Is infant being breastfed? <input type="checkbox"/> Yes <input type="checkbox"/> No                                                                                  |

**Medical and Health Information**

|                                                                                                                                                                                                                                                                                                                                                                                                                                                                                                                                                                                                                                                                                                                                                                                                                                                                                                                                                                                                                                                                                                                                                                                                                                                                                                                                                                                                                              |                                                                                                                                                                                                                                                                                                                                                                                                                                                                                                                                                                                                                                                                                                                                                                                                                                                                                                                                                                                                                                                                                                                                                    |                                                                                                                                                                                                                                                                                                                                                                                                                                                                                                                                                                                                                                                                                                                                                                                                                                                                                                                                                                                                                                                                                              |
|------------------------------------------------------------------------------------------------------------------------------------------------------------------------------------------------------------------------------------------------------------------------------------------------------------------------------------------------------------------------------------------------------------------------------------------------------------------------------------------------------------------------------------------------------------------------------------------------------------------------------------------------------------------------------------------------------------------------------------------------------------------------------------------------------------------------------------------------------------------------------------------------------------------------------------------------------------------------------------------------------------------------------------------------------------------------------------------------------------------------------------------------------------------------------------------------------------------------------------------------------------------------------------------------------------------------------------------------------------------------------------------------------------------------------|----------------------------------------------------------------------------------------------------------------------------------------------------------------------------------------------------------------------------------------------------------------------------------------------------------------------------------------------------------------------------------------------------------------------------------------------------------------------------------------------------------------------------------------------------------------------------------------------------------------------------------------------------------------------------------------------------------------------------------------------------------------------------------------------------------------------------------------------------------------------------------------------------------------------------------------------------------------------------------------------------------------------------------------------------------------------------------------------------------------------------------------------------|----------------------------------------------------------------------------------------------------------------------------------------------------------------------------------------------------------------------------------------------------------------------------------------------------------------------------------------------------------------------------------------------------------------------------------------------------------------------------------------------------------------------------------------------------------------------------------------------------------------------------------------------------------------------------------------------------------------------------------------------------------------------------------------------------------------------------------------------------------------------------------------------------------------------------------------------------------------------------------------------------------------------------------------------------------------------------------------------|
| <p>59. Risk Factors in this Pregnancy (check all that apply):</p> <ol style="list-style-type: none"> <li>1 Diabetes<br/><input type="checkbox"/> Prepregnancy (Diagnosis prior to this pregnancy)<br/><input type="checkbox"/> Gestational (Diagnosis in this pregnancy)</li> <li>2 Hypertension<br/><input type="checkbox"/> Prepregnancy (Chronic)<br/><input type="checkbox"/> Gestational (PIH, preeclampsia)<br/><input type="checkbox"/> Eclampsia</li> <li>3 <input type="checkbox"/> Previous preterm births</li> <li>4 <input type="checkbox"/> Other previous poor pregnancy outcome (includes perinatal death, small-for-gestational age/intrauterine growth restricted birth)</li> <li>5 <input type="checkbox"/> Vaginal bleeding during this pregnancy prior to the onset of labor</li> <li>6 <input type="checkbox"/> Pregnancy resulted from infertility treatment - If yes-check all that apply:<br/><input type="checkbox"/> Fertility-enhancing drugs, artificial insemination or intrauterine insemination<br/><input type="checkbox"/> Assisted reproductive technology [e.g., in vitro fertilization (IVF), gamete intrafallopian transfer (GIFT)]</li> <li>7 <input type="checkbox"/> Mother had a previous cesarean delivery?<br/>If Yes, how many _____</li> <li>8 <input type="checkbox"/> Group B Streptococcus culture positive</li> <li>9 <input type="checkbox"/> None of the above</li> </ol> | <p>60. Infections Present and/or Treated During this Pregnancy (check all that apply):</p> <ol style="list-style-type: none"> <li>1 <input type="checkbox"/> Gonorrhea</li> <li>2 <input type="checkbox"/> Syphilis</li> <li>3 <input type="checkbox"/> Herpes Simplex Virus (HSV)</li> <li>4 <input type="checkbox"/> Chlamydia</li> <li>5 <input type="checkbox"/> Hepatitis B</li> <li>6 <input type="checkbox"/> Hepatitis C</li> <li>7 <input type="checkbox"/> HIV Infection</li> <li>8 <input type="checkbox"/> Other _____<br/>Specify: _____</li> <li>9 <input type="checkbox"/> None of the above</li> </ol>                                                                                                                                                                                                                                                                                                                                                                                                                                                                                                                             | <p>61. Maternal Morbidity (complications associated with labor and delivery) (Check all that apply):</p> <ol style="list-style-type: none"> <li>1 <input type="checkbox"/> Maternal transfusion</li> <li>2 <input type="checkbox"/> Third or fourth degree perineal laceration</li> <li>3 <input type="checkbox"/> Ruptured uterus</li> <li>4 <input type="checkbox"/> Unplanned hysterectomy</li> <li>5 <input type="checkbox"/> Admission to intensive care unit</li> <li>6 <input type="checkbox"/> Unplanned operating room procedure following delivery</li> <li>7 <input type="checkbox"/> None of the above</li> </ol>                                                                                                                                                                                                                                                                                                                                                                                                                                                                |
| <p>62. Method of Delivery</p> <p>A. Was delivery with forceps attempted but unsuccessful?<br/><input type="checkbox"/> Yes <input type="checkbox"/> No</p> <p>B. Was delivery with vacuum extraction attempted but unsuccessful?<br/><input type="checkbox"/> Yes <input type="checkbox"/> No</p> <p>C. Fetal presentation at birth<br/><input type="checkbox"/> Cephalic <input type="checkbox"/> Breech <input type="checkbox"/> Other</p> <p>D. Final route and method of delivery (Check One)<br/>Vaginal: <input type="checkbox"/> Spontaneous <input type="checkbox"/> Forceps <input type="checkbox"/> Vacuum<br/>OR<br/>Cesarean: <input type="checkbox"/><br/>If cesarean, was a trial of labor attempted?<br/><input type="checkbox"/> Yes <input type="checkbox"/> No</p>                                                                                                                                                                                                                                                                                                                                                                                                                                                                                                                                                                                                                                         | <p>63. Obstetric procedures (Check all that apply):</p> <ol style="list-style-type: none"> <li>1 <input type="checkbox"/> Cervical cerclage</li> <li>2 <input type="checkbox"/> Tocolysis</li> <li>3 <input type="checkbox"/> External cephalic version:<br/><input type="checkbox"/> Successful<br/><input type="checkbox"/> Failed</li> <li>4 <input type="checkbox"/> None of the above</li> </ol> <p>64. Onset of Labor (Check all that apply):</p> <ol style="list-style-type: none"> <li>1 <input type="checkbox"/> Premature rupture of the membranes (Prolonged, ≥ 12hr)</li> <li>2 <input type="checkbox"/> Precipitous Labor (&lt; 3hr)</li> <li>3 <input type="checkbox"/> Prolonged Labor (≥ 20hr)</li> <li>4 <input type="checkbox"/> None of the above</li> </ol>                                                                                                                                                                                                                                                                                                                                                                    | <p>65. Characteristics of Labor and Delivery (Check all that apply):</p> <ol style="list-style-type: none"> <li>1 <input type="checkbox"/> Induction of labor</li> <li>2 <input type="checkbox"/> Augmentation of labor</li> <li>3 <input type="checkbox"/> Non-vertex presentation</li> <li>4 <input type="checkbox"/> Epidural or spinal anesthesia during labor</li> <li>5 <input type="checkbox"/> Steroids (glucocorticoids) for fetal lung maturation received by the mother prior to delivery</li> <li>6 <input type="checkbox"/> Antibiotics received by the mother during labor</li> <li>7 <input type="checkbox"/> Clinical chorioamnionitis diagnosed during labor or maternal temperature ≥38°C (100.4°F)</li> <li>8 <input type="checkbox"/> Moderate/heavy meconium staining of the amniotic fluid</li> <li>9 <input type="checkbox"/> Fetal intolerance of labor such that one or more of the following actions was taken: in-utero resuscitation measures, further fetal assessment, or operative delivery</li> <li>10 <input type="checkbox"/> None of the above</li> </ol> |
| <p>66. Abnormal Conditions of the Newborn (Occurring within 24 hours of delivery) (check all that apply):</p> <ol style="list-style-type: none"> <li>1 <input type="checkbox"/> Assisted ventilation required immediately following delivery</li> <li>2 <input type="checkbox"/> Assisted ventilation required for more than six hours</li> <li>3 <input type="checkbox"/> NICU admission</li> <li>4 <input type="checkbox"/> Newborn given surfactant replacement therapy</li> <li>5 <input type="checkbox"/> Antibiotics received by the newborn for suspected neonatal sepsis</li> <li>6 <input type="checkbox"/> Seizure or serious neurologic dysfunction</li> <li>7 <input type="checkbox"/> Significant birth injury (skeletal fracture(s), peripheral nerve injury, soft tissue or solid organ hemorrhage which requires intervention)</li> <li>8 <input type="checkbox"/> None of the above</li> </ol>                                                                                                                                                                                                                                                                                                                                                                                                                                                                                                              | <p>67. Congenital Anomalies of the Newborn (Observed within 24 hours of delivery) (Check all that apply)</p> <ol style="list-style-type: none"> <li>1 <input type="checkbox"/> Anencephaly</li> <li>2 <input type="checkbox"/> Meningocele / Spina bifida</li> <li>3 <input type="checkbox"/> Cyanotic congenital heart disease</li> <li>4 <input type="checkbox"/> Congenital diaphragmatic hernia</li> <li>5 <input type="checkbox"/> Omphalocele</li> <li>6 <input type="checkbox"/> Gastroschisis</li> <li>7 <input type="checkbox"/> Limb reduction defect (excluding congenital amputation and dwarfing syndrome)</li> <li>8 <input type="checkbox"/> Cleft Lip with or without Cleft Palate</li> <li>9 <input type="checkbox"/> Cleft Palate alone</li> <li>10 Down Syndrome<br/><input type="checkbox"/> Karyotype confirmed<br/><input type="checkbox"/> Karyotype pending</li> <li>11 Chromosomal disorder<br/><input type="checkbox"/> Karyotype confirmed<br/><input type="checkbox"/> Suspected, Karyotype pending</li> <li>12 <input type="checkbox"/> Hypospadias</li> <li>13 <input type="checkbox"/> None of the above</li> </ol> |                                                                                                                                                                                                                                                                                                                                                                                                                                                                                                                                                                                                                                                                                                                                                                                                                                                                                                                                                                                                                                                                                              |

**Attendant and Certifier Information**

|                                                          |                                        |
|----------------------------------------------------------|----------------------------------------|
| 68. Certifier – Name and Title                           | 69. Date Certified (MM/DD/YYYY)<br>/ / |
| 70. Attendant – Name and Title (If other than Certifier) | 71. NPI of person delivering the baby: |
